# Supplementary material for: How many fish? Comparison of two underwater visual sampling methods for monitoring fish communities
Source: PeerJ. 2018 Jun 20;6:e5066. doi: 10.7717/peerj.5066 (PMC6015482; doi:10.7717/peerj.5066)
Supplement: Supplemental Information 1 [file peerj-06-5066-s001.xlsx]

## Sheet: Distance sampling
Date	Lat	Lon	Island/Prefecture	Site	Species	Cluster size	Average fish length (cm)	Vertical distance (m)
2016-07-27	26.1677	39.0048	Lesvos	Ag. Fokas	Diplodus annularis	1	13	0.6
2016-07-27	26.1677	39.0048	Lesvos	Ag. Fokas	Diplodus sargus	3	9	6.7
2016-07-27	26.1677	39.0048	Lesvos	Ag. Fokas	Diplodus sargus	2	13	3.3
2016-07-27	26.1677	39.0048	Lesvos	Ag. Fokas	Diplodus sargus	1	16	4.8
2016-07-27	26.1677	39.0048	Lesvos	Ag. Fokas	Diplodus vulgaris	4	11	5.2
2016-07-27	26.1677	39.0048	Lesvos	Ag. Fokas	Diplodus vulgaris	4	9	4.2
2016-07-27	26.1677	39.0048	Lesvos	Ag. Fokas	Diplodus vulgaris	1	14	7
2016-07-27	26.1677	39.0048	Lesvos	Ag. Fokas	Oblada melanura	5	9	4.9
2016-07-27	26.1677	39.0048	Lesvos	Ag. Fokas	Sparisoma cretense	1	12	3.5
2016-07-27	26.1677	39.0048	Lesvos	Ag. Fokas	Sparisoma cretense	1	13	6.7
2016-07-27	26.1677	39.0048	Lesvos	Ag. Fokas	Serranus scriba	1	14	3.5
2016-07-27	26.1677	39.0048	Lesvos	Ag. Fokas	Serranus scriba	1	15	7.4
2016-07-27	26.1677	39.0048	Lesvos	Ag. Fokas	Diplodus vulgaris	3	9	4.6
2016-07-27	26.1677	39.0048	Lesvos	Ag. Fokas	Sparisoma cretense	6	14	2.6
2016-07-27	26.1677	39.0048	Lesvos	Ag. Fokas	Sparisoma cretense	2	8	4.4
2016-07-27	26.1677	39.0048	Lesvos	Ag. Fokas	Serranus scriba	1	11	2.7
2016-07-27	26.1677	39.0048	Lesvos	Ag. Fokas	Serranus scriba	1	15	1.8
2016-07-27	26.1677	39.0048	Lesvos	Ag. Fokas	Diplodus sargus	1	16	2.8
2016-07-27	26.1677	39.0048	Lesvos	Ag. Fokas	Diplodus vulgaris	1	13	7.8
2016-07-27	26.1677	39.0048	Lesvos	Ag. Fokas	Sparisoma cretense	3	14	2.7
2016-07-27	26.1677	39.0048	Lesvos	Ag. Fokas	Sparisoma cretense	2	10	4.3
2016-07-27	26.1677	39.0048	Lesvos	Ag. Fokas	Diplodus vulgaris	5	9	6
2016-07-27	26.1677	39.0048	Lesvos	Ag. Fokas	Salpa salpa	45	15	11.6
2016-07-27	26.1677	39.0048	Lesvos	Ag. Fokas	Serranus cabrilla	1	12	2.35
2016-07-27	26.1677	39.0048	Lesvos	Ag. Fokas	Serranus cabrilla	1	9	1.9
2016-07-27	26.1677	39.0048	Lesvos	Ag. Fokas	Serranus cabrilla	1	11	0.4
2016-07-27	26.1677	39.0048	Lesvos	Ag. Fokas	Epinephelus marginatus	1	42	1.3
2016-07-27	26.1677	39.0048	Lesvos	Ag. Fokas	Muraena helena	1	100	1.9
2016-07-27	26.1677	39.0048	Lesvos	Ag. Fokas	Serranus cabrilla	1	10	1.1
2016-07-27	26.1677	39.0048	Lesvos	Ag. Fokas	Serranus cabrilla	1	8	2.9
2016-07-27	26.1677	39.0048	Lesvos	Ag. Fokas	Diplodus annularis	7	11	3.7
2016-07-27	26.1677	39.0048	Lesvos	Ag. Fokas	Diplodus annularis	1	11	1.2
2016-07-27	26.1677	39.0048	Lesvos	Ag. Fokas	Salpa salpa	50	17	9.3
2016-07-27	26.1677	39.0048	Lesvos	Ag. Fokas	Serranus scriba	1	16	2.6
2016-07-27	26.1677	39.0048	Lesvos	Ag. Fokas	Serranus scriba	1	13	1.8
2016-07-27	26.1677	39.0048	Lesvos	Ag. Fokas	Scarpaena notata	1	9	2
2016-07-28	26.543	38.9978	Lesvos	Villa	Diplodus annularis	3	8	4.1
2016-07-28	26.543	38.9978	Lesvos	Villa	Diplodus sargus	1	13	2.1
2016-07-28	26.543	38.9978	Lesvos	Villa	Diplodus sargus	1	8	1.9
2016-07-28	26.543	38.9978	Lesvos	Villa	Diplodus vulgaris	1	6	1.3
2016-07-28	26.543	38.9978	Lesvos	Villa	Diplodus vulgaris	4	7	0.3
2016-07-28	26.543	38.9978	Lesvos	Villa	Diplodus vulgaris	4	12	2.4
2016-07-28	26.543	38.9978	Lesvos	Villa	Oblada melanura	7	10	4.3
2016-07-28	26.543	38.9978	Lesvos	Villa	Oblada melanura	3	11	2.6
2016-07-28	26.543	38.9978	Lesvos	Villa	Oblada melanura	5	12	3.1
2016-07-28	26.543	38.9978	Lesvos	Villa	Salpa salpa	15	8	1.5
2016-07-28	26.543	38.9978	Lesvos	Villa	Serranus scriba	1	13	1.7
2016-07-28	26.543	38.9978	Lesvos	Villa	Diplodus annularis	4	11	5.2
2016-07-28	26.543	38.9978	Lesvos	Villa	Diplodus sargus	1	10	3.1
2016-07-28	26.543	38.9978	Lesvos	Villa	Diplodus vulgaris	3	12	1.6
2016-07-28	26.543	38.9978	Lesvos	Villa	Diplodus vulgaris	2	10	1.9
2016-07-28	26.543	38.9978	Lesvos	Villa	Diplodus vulgaris	1	14	2.3
2016-07-28	26.543	38.9978	Lesvos	Villa	Diplodus vulgaris	1	6	3.2
2016-07-28	26.543	38.9978	Lesvos	Villa	Diplodus vulgaris	1	8	0.4
2016-07-28	26.543	38.9978	Lesvos	Villa	Oblada melanura	9	12	5.8
2016-07-28	26.543	38.9978	Lesvos	Villa	Sparisoma cretense	3	13	1.7
2016-07-28	26.543	38.9978	Lesvos	Villa	Serranus scriba	1	15	3.4
2016-07-28	26.543	38.9978	Lesvos	Villa	Serranus scriba	1	13	2.8
2016-07-28	26.543	38.9978	Lesvos	Villa	Mullus surmuletus	4	10	3.3
2016-07-28	26.543	38.9978	Lesvos	Villa	Diplodus annularis	4	8	2.7
2016-07-28	26.543	38.9978	Lesvos	Villa	Diplodus sargus	2	13	1.7
2016-07-28	26.543	38.9978	Lesvos	Villa	Diplodus sargus	3	10	0.8
2016-07-28	26.543	38.9978	Lesvos	Villa	Diplodus vulgaris	3	10	1.4
2016-07-28	26.543	38.9978	Lesvos	Villa	Diplodus vulgaris	7	11	2.3
2016-07-28	26.543	38.9978	Lesvos	Villa	Oblada melanura	9	14	3.1
2016-07-28	26.543	38.9978	Lesvos	Villa	Oblada melanura	15	10	2.4
2016-07-28	26.543	38.9978	Lesvos	Villa	Oblada melanura	1	11	2.7
2016-07-28	26.543	38.9978	Lesvos	Villa	Oblada melanura	16	13	3.6
2016-07-28	26.543	38.9978	Lesvos	Villa	Salpa salpa	6	10	3.7
2016-07-28	26.543	38.9978	Lesvos	Villa	Salpa salpa	50	14	7.1
2016-07-28	26.543	38.9978	Lesvos	Villa	Sparisoma cretense	4	9	4.1
2016-07-28	26.543	38.9978	Lesvos	Villa	Sparisoma cretense	10	13	1.9
2016-07-28	26.543	38.9978	Lesvos	Villa	Sparisoma cretense	3	11	0.7
2016-07-28	26.543	38.9978	Lesvos	Villa	Serranus cabrilla	1	10	3.1
2016-07-28	26.543	38.9978	Lesvos	Villa	Serranus scriba	1	12	2.6
2016-07-28	26.543	38.9978	Lesvos	Villa	Serranus scriba	1	13	3.3
2016-07-28	26.543	38.9978	Lesvos	Villa	Scorpaena porcus	1	8	0.2
2016-07-28	26.543	38.9978	Lesvos	Villa	Diplodus annularis	1	12	3.1
2016-07-28	26.543	38.9978	Lesvos	Villa	Diplodus sargus	4	10	3.7
2016-07-28	26.543	38.9978	Lesvos	Villa	Diplodus sargus	1	19	6.1
2016-07-28	26.543	38.9978	Lesvos	Villa	Diplodus vulgaris	6	11	5.3
2016-07-28	26.543	38.9978	Lesvos	Villa	Diplodus vulgaris	1	7	0.9
2016-07-28	26.543	38.9978	Lesvos	Villa	Diplodus vulgaris	1	7	3.6
2016-07-28	26.543	38.9978	Lesvos	Villa	Diplodus vulgaris	11	8	2.7
2016-07-28	26.543	38.9978	Lesvos	Villa	Oblada melanura	4	8	4
2016-07-28	26.543	38.9978	Lesvos	Villa	Oblada melanura	15	10	7.6
2016-07-28	26.543	38.9978	Lesvos	Villa	Salpa salpa	2	13	3.2
2016-07-28	26.543	38.9978	Lesvos	Villa	Salpa salpa	40	15	3.2
2016-07-28	26.543	38.9978	Lesvos	Villa	Sparisoma cretense	3	12	5.4
2016-07-28	26.543	38.9978	Lesvos	Villa	Sparisoma cretense	1	16	1.3
2016-07-28	26.543	38.9978	Lesvos	Villa	Sparisoma cretense	4	10	3.7
2016-07-28	26.543	38.9978	Lesvos	Villa	Serranus scriba	1	13	2.7
2016-07-28	26.543	38.9978	Lesvos	Villa	Mullus surmuletus	3	9	2.3
2016-07-28	26.543	38.9978	Lesvos	Villa	Diplodus sargus	2	13	1.7
2016-07-28	26.543	38.9978	Lesvos	Villa	Diplodus sargus	5	12	2.3
2016-07-28	26.543	38.9978	Lesvos	Villa	Diplodus sargus	2	10	2.6
2016-07-28	26.543	38.9978	Lesvos	Villa	Diplodus vulgaris	1	14	4.6
2016-07-28	26.543	38.9978	Lesvos	Villa	Diplodus vulgaris	12	9	7.2
2016-07-28	26.543	38.9978	Lesvos	Villa	Diplodus vulgaris	3	8	1.6
2016-07-28	26.543	38.9978	Lesvos	Villa	Diplodus puntazzo	2	16	1.3
2016-07-28	26.543	38.9978	Lesvos	Villa	Salpa salpa	30	11	0
2016-07-28	26.543	38.9978	Lesvos	Villa	Salpa salpa	50	10	4.2
2016-07-28	26.543	38.9978	Lesvos	Villa	Sparisoma cretense	4	9	3.2
2016-07-28	26.543	38.9978	Lesvos	Villa	Serranus cabrilla	1	9	3.7
2016-07-28	26.543	38.9978	Lesvos	Villa	Serranus scriba	2	13	4.1
2016-07-28	26.543	38.9978	Lesvos	Villa	Diplodus sargus	4	14	5.2
2016-07-28	26.543	38.9978	Lesvos	Villa	Diplodus vulgaris	4	12	2.3
2016-07-28	26.543	38.9978	Lesvos	Villa	Diplodus vulgaris	16	13	1.3
2016-07-28	26.543	38.9978	Lesvos	Villa	Diplodus vulgaris	1	10	1.1
2016-07-28	26.543	38.9978	Lesvos	Villa	Diplodus vulgaris	20	12	6.3
2016-07-28	26.543	38.9978	Lesvos	Villa	Oblada melanura	9	14	1.8
2016-07-28	26.543	38.9978	Lesvos	Villa	Serranus cabrilla	1	10	1.4
2016-07-28	26.543	38.9978	Lesvos	Villa	Serranus cabrilla	1	13	6.7
2016-07-28	26.543	38.9978	Lesvos	Villa	Serranus cabrilla	1	12	0.7
2016-07-28	26.543	38.9978	Lesvos	Villa	Serranus scriba	1	12	0.9
2016-07-28	26.543	38.9978	Lesvos	Villa	Serranus scriba	2	13	1.4
2016-07-28	26.543	38.9978	Lesvos	Villa	Mullus surmuletus	4	10	1.9
2016-09-11	23.116	39.087	Pelion	Agia Vaso, Riho	Diplodus annularis	2	12	1.9
2016-09-11	23.116	39.087	Pelion	Agia Vaso, Riho	Diplodus annularis	1	10	1.4
2016-09-11	23.116	39.087	Pelion	Agia Vaso, Riho	Diplodus puntazzo	1	10	5.1
2016-09-11	23.116	39.087	Pelion	Agia Vaso, Riho	Diplodus puntazzo	1	13	0.9
2016-09-11	23.116	39.087	Pelion	Agia Vaso, Riho	Diplodus puntazzo	1	11	6.9
2016-09-11	23.116	39.087	Pelion	Agia Vaso, Riho	Diplodus sargus	2	12	2.1
2016-09-11	23.116	39.087	Pelion	Agia Vaso, Riho	Diplodus sargus	4	9	0.9
2016-09-11	23.116	39.087	Pelion	Agia Vaso, Riho	Diplodus sargus	5	8	3.4
2016-09-11	23.116	39.087	Pelion	Agia Vaso, Riho	Diplodus sargus	1	5	0.2
2016-09-11	23.116	39.087	Pelion	Agia Vaso, Riho	Diplodus vulgaris	1	4	1.2
2016-09-11	23.116	39.087	Pelion	Agia Vaso, Riho	Diplodus vulgaris	2	5	0.3
2016-09-11	23.116	39.087	Pelion	Agia Vaso, Riho	Diplodus vulgaris	2	9	1.1
2016-09-11	23.116	39.087	Pelion	Agia Vaso, Riho	Diplodus vulgaris	3	11	2.7
2016-09-11	23.116	39.087	Pelion	Agia Vaso, Riho	Diplodus vulgaris	3	8	2.4
2016-09-11	23.116	39.087	Pelion	Agia Vaso, Riho	Diplodus vulgaris	4	9	1.3
2016-09-11	23.116	39.087	Pelion	Agia Vaso, Riho	Diplodus vulgaris	7	10	0.8
2016-09-11	23.116	39.087	Pelion	Agia Vaso, Riho	Diplodus vulgaris	5	11	2.3
2016-09-11	23.116	39.087	Pelion	Agia Vaso, Riho	Sarpa salpa	19	13	5.7
2016-09-11	23.116	39.087	Pelion	Agia Vaso, Riho	Serranus scriba	1	4	0.1
2016-09-11	23.116	39.087	Pelion	Agia Vaso, Riho	Serranus scriba	1	14	3.1
2016-09-11	23.116	39.087	Pelion	Agia Vaso, Riho	Serranus scriba	2	12	4.3
2016-09-11	23.116	39.087	Pelion	Agia Vaso, Riho	Diplodus puntazzo	1	12	2.4
2016-09-11	23.116	39.087	Pelion	Agia Vaso, Riho	Diplodus puntazzo	2	10	3.6
2016-09-11	23.116	39.087	Pelion	Agia Vaso, Riho	Diplodus sargus	4	10	1.7
2016-09-11	23.116	39.087	Pelion	Agia Vaso, Riho	Diplodus sargus	1	13	4.2
2016-09-11	23.116	39.087	Pelion	Agia Vaso, Riho	Diplodus vulgaris	2	8	4.2
2016-09-11	23.116	39.087	Pelion	Agia Vaso, Riho	Diplodus vulgaris	3	12	2.1
2016-09-11	23.116	39.087	Pelion	Agia Vaso, Riho	Diplodus vulgaris	2	12	7.1
2016-09-11	23.116	39.087	Pelion	Agia Vaso, Riho	Diplodus vulgaris	5	10	1.4
2016-09-11	23.116	39.087	Pelion	Agia Vaso, Riho	Mullus surmuletus	3	14	10.7
2016-09-11	23.116	39.087	Pelion	Agia Vaso, Riho	Serranus scriba	2	13	3.5
2016-09-11	23.116	39.087	Pelion	Agia Vaso, Riho	Serranus scriba	1	11	1.7
2016-09-11	23.116	39.087	Pelion	Agia Vaso, Riho	Serranus scriba	1	9	3.1
2016-09-11	23.116	39.087	Pelion	Agia Vaso, Riho	Diplodus puntazzo	2	13	2.1
2016-09-11	23.116	39.087	Pelion	Agia Vaso, Riho	Diplodus sargus	1	12	2.4
2016-09-11	23.116	39.087	Pelion	Agia Vaso, Riho	Diplodus vulgaris	6	11	4.3
2016-09-11	23.116	39.087	Pelion	Agia Vaso, Riho	Diplodus vulgaris	7	12	3.2
2016-09-11	23.116	39.087	Pelion	Agia Vaso, Riho	Diplodus vulgaris	5	10	3.2
2016-09-11	23.116	39.087	Pelion	Agia Vaso, Riho	Diplodus vulgaris	1	13	1.4
2016-09-11	23.116	39.087	Pelion	Agia Vaso, Riho	Mullus surmuletus	2	13	4.1
2016-09-11	23.116	39.087	Pelion	Agia Vaso, Riho	Mullus surmuletus	2	11	3.2
2016-09-11	23.116	39.087	Pelion	Agia Vaso, Riho	Oblada melanura	3	6	3.1
2016-09-11	23.116	39.087	Pelion	Agia Vaso, Riho	Oblada melanura	10	7	2.3
2016-09-11	23.116	39.087	Pelion	Agia Vaso, Riho	Oblada melanura	100	5	1.3
2016-09-11	23.116	39.087	Pelion	Agia Vaso, Riho	Serranus scriba	1	13	4.3
2016-09-11	23.116	39.087	Pelion	Agia Vaso, Riho	Serranus scriba	1	12	2.6
2016-09-11	23.116	39.087	Pelion	Agia Vaso, Riho	Serranus scriba	1	6	0.3
2016-09-11	23.116	39.087	Pelion	Agia Vaso, Riho	Sarpa salpa	2	6	1.5
2016-09-11	23.116	39.087	Pelion	Agia Vaso, Riho	Diplodus sargus	1	13	3.2
2016-09-11	23.116	39.087	Pelion	Agia Vaso, Riho	Diplodus sargus	5	9	1.4
2016-09-11	23.116	39.087	Pelion	Agia Vaso, Riho	Diplodus sargus	1	14	2.3
2016-09-11	23.116	39.087	Pelion	Agia Vaso, Riho	Sarpa salpa	35	14	1.7
2016-09-11	23.116	39.087	Pelion	Agia Vaso, Riho	Serranus scriba	1	12	0.9
2016-09-11	23.116	39.087	Pelion	Agia Vaso, Riho	Serranus scriba	1	14	2.1
2016-09-11	23.116	39.087	Pelion	Agia Vaso, Riho	Diplodus vulgaris	1	15	4.3
2016-09-11	23.116	39.087	Pelion	Agia Vaso, Riho	Diplodus vulgaris	1	9	1.5
2016-09-11	23.116	39.087	Pelion	Agia Vaso, Riho	Diplodus vulgaris	3	10	6.2
2016-09-11	23.116	39.087	Pelion	Agia Vaso, Riho	Diplodus vulgaris	4	14	7.1
2016-09-11	23.116	39.087	Pelion	Agia Vaso, Riho	Mullus surmuletus	3	15	6.9
2016-09-11	23.116	39.087	Pelion	Agia Vaso, Riho	Serranus scriba	1	13	0.7
2016-09-11	23.116	39.087	Pelion	Agia Vaso, Riho	Serranus scriba	1	6	0.5
2016-09-11	23.116	39.087	Pelion	Agia Vaso, Riho	Diplodus sargus	1	11	2.6
2016-09-11	23.116	39.087	Pelion	Agia Vaso, Riho	Diplodus vulgaris	4	13	1.9
2016-09-11	23.116	39.087	Pelion	Agia Vaso, Riho	Diplodus vulgaris	1	9	2.4
2016-09-11	23.116	39.087	Pelion	Agia Vaso, Riho	Diplodus vulgaris	3	12	2.4
2016-09-11	23.116	39.087	Pelion	Agia Vaso, Riho	Diplodus vulgaris	5	13	2.1
2016-09-11	23.116	39.087	Pelion	Agia Vaso, Riho	Diplodus vulgaris	12	8	2.7
2016-09-11	23.116	39.087	Pelion	Agia Vaso, Riho	Mullus surmuletus	2	5	0.3
2016-09-11	23.116	39.087	Pelion	Agia Vaso, Riho	Oblada melanura	14	8	3.1
2016-09-11	23.116	39.087	Pelion	Agia Vaso, Riho	Scorpaena porcus	1	5	0.4
2016-09-11	23.116	39.087	Pelion	Agia Vaso, Riho	Serranus scriba	1	14	1.7
2016-09-11	23.116	39.087	Pelion	Agia Vaso, Riho	Serranus scriba	1	7	5.2
2016-09-11	23.116	39.087	Pelion	Agia Vaso, Riho	Serranus scriba	1	13	1.3
2016-09-11	23.116	39.087	Pelion	Agia Vaso, Riho	Serranus scriba	2	5	0.1
2016-09-11	23.116	39.087	Pelion	Agia Vaso, Riho	Serranus scriba	1	6	1.3
2016-09-11	23.0573	39.0952	Pelion	Geroplina	Diplodus vulgaris	11	9	1.2
2016-09-11	23.0573	39.0952	Pelion	Geroplina	Diplodus vulgaris	2	10	2.3
2016-09-11	23.0573	39.0952	Pelion	Geroplina	Diplodus vulgaris	2	11	2.2
2016-09-11	23.0573	39.0952	Pelion	Geroplina	Oblada melanura	40	10	1.1
2016-09-11	23.0573	39.0952	Pelion	Geroplina	Serranus scriba	1	10	3.1
2016-09-11	23.0573	39.0952	Pelion	Geroplina	Serranus scriba	1	5	0.4
2016-09-11	23.0573	39.0952	Pelion	Geroplina	Diplodus vulgaris	3	10	4.6
2016-09-11	23.0573	39.0952	Pelion	Geroplina	Mullus surmuletus	3	13	9.2
2016-09-11	23.0573	39.0952	Pelion	Geroplina	Mullus surmuletus	2	14	5.1
2016-09-11	23.0573	39.0952	Pelion	Geroplina	Serranus scriba	1	6	3.2
2016-09-11	23.0573	39.0952	Pelion	Geroplina	Serranus scriba	2	8	3.4
2016-09-11	23.0573	39.0952	Pelion	Geroplina	Serranus scriba	3	7	5.3
2016-09-11	23.0573	39.0952	Pelion	Geroplina	Serranus scriba	1	5	4.3
2016-09-11	23.0573	39.0952	Pelion	Geroplina	Serranus scriba	5	9	3.3
2016-09-11	23.0573	39.0952	Pelion	Geroplina	Diplodus sargus	1	16	1.3
2016-09-11	23.0573	39.0952	Pelion	Geroplina	Diplodus sargus	4	15	4.9
2016-09-11	23.0573	39.0952	Pelion	Geroplina	Diplodus vulgaris	1	13	5.1
2016-09-11	23.0573	39.0952	Pelion	Geroplina	Diplodus vulgaris	1	15	7.1
2016-09-11	23.0573	39.0952	Pelion	Geroplina	Diplodus vulgaris	7	14	6.3
2016-09-11	23.0573	39.0952	Pelion	Geroplina	Diplodus vulgaris	15	13	5.4
2016-09-11	23.0573	39.0952	Pelion	Geroplina	Diplodus vulgaris	1	10	2.4
2016-09-11	23.0573	39.0952	Pelion	Geroplina	Diplodus vulgaris	1	7	0.7
2016-09-11	23.0573	39.0952	Pelion	Geroplina	Mullus surmuletus	3	12	4.5
2016-09-11	23.0573	39.0952	Pelion	Geroplina	Serranus scriba	1	7	0.3
2016-09-11	23.0573	39.0952	Pelion	Geroplina	Serranus scriba	1	9	1.4
2016-09-11	23.0573	39.0952	Pelion	Geroplina	Serranus scriba	3	11	4.9
2016-09-11	23.0573	39.0952	Pelion	Geroplina	Serranus scriba	1	14	0.3
2016-09-11	23.0573	39.0952	Pelion	Geroplina	Diplodus vulgaris	1	12	5.2
2016-09-11	23.0573	39.0952	Pelion	Geroplina	Diplodus vulgaris	1	10	4.7
2016-09-11	23.0573	39.0952	Pelion	Geroplina	Spondiliosoma cantharus	5	7	2.1
2016-09-11	23.0573	39.0952	Pelion	Geroplina	Serranus scriba	1	13	1.4
2016-09-11	23.0573	39.0952	Pelion	Geroplina	Serranus scriba	2	8	0.1
2016-09-11	23.0573	39.0952	Pelion	Geroplina	Serranus scriba	1	12	2.7
2016-09-11	23.0573	39.0952	Pelion	Geroplina	Serranus scriba	1	12	3
2016-09-11	23.0573	39.0952	Pelion	Geroplina	Scorpaena porcus	1	5	0.2
2016-09-11	23.0573	39.0952	Pelion	Geroplina	Diplodus sargus	1	14	3.2
2016-09-11	23.0573	39.0952	Pelion	Geroplina	Diplodus vulgaris	2	9	1.2
2016-09-11	23.0573	39.0952	Pelion	Geroplina	Diplodus vulgaris	1	6	2.4
2016-09-11	23.0573	39.0952	Pelion	Geroplina	Diplodus vulgaris	1	14	3.5
2016-09-11	23.0573	39.0952	Pelion	Geroplina	Diplodus vulgaris	1	10	4.2
2016-09-11	23.0573	39.0952	Pelion	Geroplina	Serranus scriba	2	12	2.4
2016-09-11	23.0573	39.0952	Pelion	Geroplina	Serranus scriba	1	6	4.7
2016-09-11	23.0573	39.0952	Pelion	Geroplina	Serranus scriba	1	11	3.1
2016-09-11	23.0573	39.0952	Pelion	Geroplina	Serranus scriba	3	10	5.9
2016-09-11	23.0573	39.0952	Pelion	Geroplina	Serranus scriba	1	10	0.3
2016-09-11	23.0573	39.0952	Pelion	Geroplina	Serranus scriba	1	15	0.8
2016-09-11	23.0573	39.0952	Pelion	Geroplina	Serranus scriba	1	12	4.3
2016-09-11	23.0573	39.0952	Pelion	Geroplina	Serranus scriba	1	10	3.5
2016-09-11	23.0573	39.0952	Pelion	Geroplina	Serranus scriba	1	6	3.3
2016-09-11	23.0573	39.0952	Pelion	Geroplina	Diplodus vulgaris	1	11	2.2
2016-09-11	23.0573	39.0952	Pelion	Geroplina	Diplodus vulgaris	1	10	3.1
2016-09-11	23.0573	39.0952	Pelion	Geroplina	Serranus scriba	1	5	4.1
2016-09-11	23.0573	39.0952	Pelion	Geroplina	Serranus scriba	4	10	3.7
2016-09-11	23.0573	39.0952	Pelion	Geroplina	Serranus scriba	1	10	3.6
2016-09-11	23.0573	39.0952	Pelion	Geroplina	Serranus scriba	1	11	2.4
2016-09-11	23.0573	39.0952	Pelion	Geroplina	Serranus scriba	1	13	3.2
2016-09-12	23.0684	39.1287	Pelion	Bora	Diplodus annularis	1	11	1.3
2016-09-12	23.0684	39.1287	Pelion	Bora	Diplodus annularis	1	12	0.4
2016-09-12	23.0684	39.1287	Pelion	Bora	Diplodus puntazzo	1	8	1.1
2016-09-12	23.0684	39.1287	Pelion	Bora	Diplodus puntazzo	3	10	4.2
2016-09-12	23.0684	39.1287	Pelion	Bora	Diplodus sargus	2	14	3.4
2016-09-12	23.0684	39.1287	Pelion	Bora	Diplodus vulgaris	1	8	1.9
2016-09-12	23.0684	39.1287	Pelion	Bora	Diplodus vulgaris	3	7	0.3
2016-09-12	23.0684	39.1287	Pelion	Bora	Diplodus vulgaris	4	6	0.5
2016-09-12	23.0684	39.1287	Pelion	Bora	Diplodus vulgaris	3	5	1.2
2016-09-12	23.0684	39.1287	Pelion	Bora	Diplodus vulgaris	2	12	2.4
2016-09-12	23.0684	39.1287	Pelion	Bora	Diplodus vulgaris	3	9	1.2
2016-09-12	23.0684	39.1287	Pelion	Bora	Diplodus vulgaris	5	8	1.1
2016-09-12	23.0684	39.1287	Pelion	Bora	Diplodus vulgaris	3	11	1.6
2016-09-12	23.0684	39.1287	Pelion	Bora	Sarpa salpa	14	15	5.6
2016-09-12	23.0684	39.1287	Pelion	Bora	Serranus scriba	1	10	0.4
2016-09-12	23.0684	39.1287	Pelion	Bora	Serranus scriba	1	8	1.3
2016-09-12	23.0684	39.1287	Pelion	Bora	Serranus scriba	1	11	2.7
2016-09-12	23.0684	39.1287	Pelion	Bora	Serranus scriba	1	9	0.7
2016-09-12	23.0684	39.1287	Pelion	Bora	Serranus scriba	1	12	1.9
2016-09-12	23.0684	39.1287	Pelion	Bora	Diplodus puntazzo	2	10	0.4
2016-09-12	23.0684	39.1287	Pelion	Bora	Diplodus puntazzo	3	9	1.3
2016-09-12	23.0684	39.1287	Pelion	Bora	Diplodus vulgaris	3	10	1.6
2016-09-12	23.0684	39.1287	Pelion	Bora	Diplodus vulgaris	4	11	3.2
2016-09-12	23.0684	39.1287	Pelion	Bora	Diplodus vulgaris	4	9	1.3
2016-09-12	23.0684	39.1287	Pelion	Bora	Diplodus vulgaris	3	12	1.4
2016-09-12	23.0684	39.1287	Pelion	Bora	Diplodus vulgaris	3	14	4.2
2016-09-12	23.0684	39.1287	Pelion	Bora	Diplodus vulgaris	2	9	1.1
2016-09-12	23.0684	39.1287	Pelion	Bora	Diplodus vulgaris	4	10	2.1
2016-09-12	23.0684	39.1287	Pelion	Bora	Diplodus vulgaris	7	5	1.2
2016-09-12	23.0684	39.1287	Pelion	Bora	Diplodus vulgaris	3	15	3.1
2016-09-12	23.0684	39.1287	Pelion	Bora	Diplodus vulgaris	2	16	5.3
2016-09-12	23.0684	39.1287	Pelion	Bora	Diplodus vulgaris	5	10	1.4
2016-09-12	23.0684	39.1287	Pelion	Bora	Oblada melanura	8	5	1.21
2016-09-12	23.0684	39.1287	Pelion	Bora	Oblada melanura	4	14	6.1
2016-09-12	23.0684	39.1287	Pelion	Bora	Oblada melanura	40	12	3.9
2016-09-12	23.0684	39.1287	Pelion	Bora	Sarpa salpa	16	18	0.7
2016-09-12	23.0684	39.1287	Pelion	Bora	Serranus scriba	2	11	0.9
2016-09-12	23.0684	39.1287	Pelion	Bora	Serranus scriba	1	17	4.2
2016-09-12	23.0684	39.1287	Pelion	Bora	Serranus scriba	1	12	0.1
2016-09-12	23.0684	39.1287	Pelion	Bora	Serranus scriba	3	10	1.2
2016-09-12	23.0684	39.1287	Pelion	Bora	Serranus scriba	2	8	0.2
2016-09-12	23.0684	39.1287	Pelion	Bora	Diplodus vulgaris	3	10	2.1
2016-09-12	23.0684	39.1287	Pelion	Bora	Diplodus vulgaris	2	8	0.6
2016-09-12	23.0684	39.1287	Pelion	Bora	Diplodus vulgaris	2	10	0.1
2016-09-12	23.0684	39.1287	Pelion	Bora	Diplodus vulgaris	2	11	3
2016-09-12	23.0684	39.1287	Pelion	Bora	Oblada melanura	11	7	3.1
2016-09-12	23.0684	39.1287	Pelion	Bora	Serranus scriba	2	10	1.1
2016-09-12	23.0684	39.1287	Pelion	Bora	Serranus scriba	1	11	0.3
2016-09-12	23.0684	39.1287	Pelion	Bora	Serranus scriba	1	13	5.6
2016-09-12	23.0684	39.1287	Pelion	Bora	Serranus scriba	2	10	1.4
2016-09-12	23.0684	39.1287	Pelion	Bora	Serranus scriba	1	14	1.1
2016-09-12	23.0684	39.1287	Pelion	Bora	Serranus scriba	1	12	0.3
2016-09-12	23.0684	39.1287	Pelion	Bora	Serranus scriba	2	10	0.9
2016-09-12	23.0684	39.1287	Pelion	Bora	Diplodus vulgaris	1	8	2.3
2016-09-12	23.0684	39.1287	Pelion	Bora	Serranus scriba	1	14	1.5
2016-09-12	23.0684	39.1287	Pelion	Bora	Serranus scriba	1	16	3.1
2016-09-12	23.0684	39.1287	Pelion	Bora	Serranus scriba	1	13	1.9
2016-09-12	23.0684	39.1287	Pelion	Bora	Serranus scriba	1	14	3.2
2016-09-12	23.0684	39.1287	Pelion	Bora	Serranus scriba	1	14	2.7
2016-09-12	23.0684	39.1287	Pelion	Bora	Diplodus vulgaris	1	10	3.7
2016-09-12	23.0684	39.1287	Pelion	Bora	Diplodus vulgaris	5	11	1.1
2016-09-12	23.0684	39.1287	Pelion	Bora	Diplodus vulgaris	3	12	4.1
2016-09-12	23.0684	39.1287	Pelion	Bora	Diplodus vulgaris	1	8	1.3
2016-09-12	23.0684	39.1287	Pelion	Bora	Diplodus vulgaris	5	10	3.3
2016-09-12	23.0684	39.1287	Pelion	Bora	Oblada melanura	20	12	1.7
2016-09-12	23.0684	39.1287	Pelion	Bora	Serranus scriba	1	10	3.3
2016-09-12	23.0684	39.1287	Pelion	Bora	Serranus scriba	1	13	2.5
2016-09-12	23.0684	39.1287	Pelion	Bora	Serranus scriba	2	12	2.6
2016-09-12	23.0684	39.1287	Pelion	Bora	Serranus scriba	2	11	1.2
2016-09-12	23.0684	39.1287	Pelion	Bora	Serranus scriba	1	10	4.1
2016-09-12	23.0684	39.1287	Pelion	Bora	Serranus scriba	1	13	5.2
2016-09-12	23.0684	39.1287	Pelion	Bora	Diplodus vulgaris	4	14	7.8
2016-09-12	23.0684	39.1287	Pelion	Bora	Diplodus vulgaris	1	15	1
2016-09-12	23.0684	39.1287	Pelion	Bora	Diplodus vulgaris	2	13	5.1
2016-09-12	23.0684	39.1287	Pelion	Bora	Diplodus vulgaris	1	10	7.2
2016-09-12	23.0684	39.1287	Pelion	Bora	Diplodus vulgaris	3	8	0.3
2016-09-12	23.0684	39.1287	Pelion	Bora	Diplodus vulgaris	2	9	1.2
2016-09-12	23.0684	39.1287	Pelion	Bora	Sarpa salpa	12	12	2.6
2016-09-12	23.0684	39.1287	Pelion	Bora	Sarpa salpa	10	16	6.1
2016-09-12	23.0684	39.1287	Pelion	Bora	Sarpa salpa	10	14	3.1
2016-09-12	23.0684	39.1287	Pelion	Bora	Sarpa salpa	6	11	1.2
2016-09-12	23.0684	39.1287	Pelion	Bora	Serranus scriba	2	12	6.6
2016-09-12	23.0684	39.1287	Pelion	Bora	Serranus scriba	1	11	5.4
2016-09-12	23.0684	39.1287	Pelion	Bora	Serranus scriba	1	10	0.7
2016-09-12	23.0684	39.1287	Pelion	Bora	Serranus scriba	4	13	6.2
2016-09-12	23.0505	39.0979	Pelion	Faros Kavoulia	Diplodus vulgaris	3	10	1.3
2016-09-12	23.0505	39.0979	Pelion	Faros Kavoulia	Diplodus vulgaris	5	12	2.1
2016-09-12	23.0505	39.0979	Pelion	Faros Kavoulia	Diplodus vulgaris	2	12	5.1
2016-09-12	23.0505	39.0979	Pelion	Faros Kavoulia	Diplodus vulgaris	2	9	3.2
2016-09-12	23.0505	39.0979	Pelion	Faros Kavoulia	Diplodus vulgaris	3	11	4.2
2016-09-12	23.0505	39.0979	Pelion	Faros Kavoulia	Diplodus vulgaris	4	9	3
2016-09-12	23.0505	39.0979	Pelion	Faros Kavoulia	Diplodus vulgaris	5	9	4.6
2016-09-12	23.0505	39.0979	Pelion	Faros Kavoulia	Mullus surmuletus	2	14	5.2
2016-09-12	23.0505	39.0979	Pelion	Faros Kavoulia	Oblada melanura	100	9	0.1
2016-09-12	23.0505	39.0979	Pelion	Faros Kavoulia	Serranus scriba	2	11	1.5
2016-09-12	23.0505	39.0979	Pelion	Faros Kavoulia	Serranus scriba	2	13	0.4
2016-09-12	23.0505	39.0979	Pelion	Faros Kavoulia	Serranus scriba	1	14	3.4
2016-09-12	23.0505	39.0979	Pelion	Faros Kavoulia	Serranus scriba	3	13	5.5
2016-09-12	23.0505	39.0979	Pelion	Faros Kavoulia	Serranus scriba	3	10	2.1
2016-09-12	23.0505	39.0979	Pelion	Faros Kavoulia	Serranus scriba	2	7	3.9
2016-09-12	23.0505	39.0979	Pelion	Faros Kavoulia	Diplodus annularis	1	6	0.2
2016-09-12	23.0505	39.0979	Pelion	Faros Kavoulia	Diplodus annularis	4	10	1.3
2016-09-12	23.0505	39.0979	Pelion	Faros Kavoulia	Diplodus annularis	5	8	1.9
2016-09-12	23.0505	39.0979	Pelion	Faros Kavoulia	Diplodus vulgaris	3	9	3.2
2016-09-12	23.0505	39.0979	Pelion	Faros Kavoulia	Diplodus vulgaris	21	10	1.2
2016-09-12	23.0505	39.0979	Pelion	Faros Kavoulia	Diplodus vulgaris	3	12	2.3
2016-09-12	23.0505	39.0979	Pelion	Faros Kavoulia	Diplodus vulgaris	4	9	2.5
2016-09-12	23.0505	39.0979	Pelion	Faros Kavoulia	Mullus surmuletus	2	8	2.5
2016-09-12	23.0505	39.0979	Pelion	Faros Kavoulia	Mullus surmuletus	2	10	3.6
2016-09-12	23.0505	39.0979	Pelion	Faros Kavoulia	Mullus surmuletus	3	11	3.1
2016-09-12	23.0505	39.0979	Pelion	Faros Kavoulia	Mullus surmuletus	3	12	7.5
2016-09-12	23.0505	39.0979	Pelion	Faros Kavoulia	Oblada melanura	100	10	2.1
2016-09-12	23.0505	39.0979	Pelion	Faros Kavoulia	Sarpa salpa	10	12	2.1
2016-09-12	23.0505	39.0979	Pelion	Faros Kavoulia	Serranus scriba	2	7	2.1
2016-09-12	23.0505	39.0979	Pelion	Faros Kavoulia	Serranus scriba	2	5	0.3
2016-09-12	23.0505	39.0979	Pelion	Faros Kavoulia	Serranus scriba	4	12	3.1
2016-09-12	23.0505	39.0979	Pelion	Faros Kavoulia	Serranus scriba	2	10	5.6
2016-09-12	23.0505	39.0979	Pelion	Faros Kavoulia	Serranus scriba	5	10	2.1
2016-09-12	23.0505	39.0979	Pelion	Faros Kavoulia	Serranus scriba	3	9	1.7
2016-09-12	23.0505	39.0979	Pelion	Faros Kavoulia	Serranus scriba	3	7	1.4
2016-09-12	23.0505	39.0979	Pelion	Faros Kavoulia	Diplodus puntazzo	2	13	3.2
2016-09-12	23.0505	39.0979	Pelion	Faros Kavoulia	Diplodus vulgaris	4	10	2.3
2016-09-12	23.0505	39.0979	Pelion	Faros Kavoulia	Diplodus vulgaris	3	8	0.7
2016-09-12	23.0505	39.0979	Pelion	Faros Kavoulia	Diplodus vulgaris	4	9	1.5
2016-09-12	23.0505	39.0979	Pelion	Faros Kavoulia	Diplodus vulgaris	5	10	3.1
2016-09-12	23.0505	39.0979	Pelion	Faros Kavoulia	Diplodus vulgaris	2	10	1.3
2016-09-12	23.0505	39.0979	Pelion	Faros Kavoulia	Diplodus vulgaris	3	9	0.4
2016-09-12	23.0505	39.0979	Pelion	Faros Kavoulia	Diplodus vulgaris	2	7	0.4
2016-09-12	23.0505	39.0979	Pelion	Faros Kavoulia	Diplodus vulgaris	5	11	1.4
2016-09-12	23.0505	39.0979	Pelion	Faros Kavoulia	Oblada melanura	3	7	1.3
2016-09-12	23.0505	39.0979	Pelion	Faros Kavoulia	Sarpa salpa	5	13	7.1
2016-09-12	23.0505	39.0979	Pelion	Faros Kavoulia	Serranus scriba	3	10	1.4
2016-09-12	23.0505	39.0979	Pelion	Faros Kavoulia	Serranus scriba	12	13	2.4
2016-09-12	23.0505	39.0979	Pelion	Faros Kavoulia	Diplodus vulgaris	10	18	5.6
2016-09-12	23.0505	39.0979	Pelion	Faros Kavoulia	Diplodus vulgaris	4	15	4.7
2016-09-12	23.0505	39.0979	Pelion	Faros Kavoulia	Diplodus vulgaris	3	7	1.3
2016-09-12	23.0505	39.0979	Pelion	Faros Kavoulia	Diplodus vulgaris	4	9	2.4
2016-09-12	23.0505	39.0979	Pelion	Faros Kavoulia	Diplodus vulgaris	5	16	2.3
2016-09-12	23.0505	39.0979	Pelion	Faros Kavoulia	Diplodus vulgaris	2	11	1.3
2016-09-12	23.0505	39.0979	Pelion	Faros Kavoulia	Serranus scriba	3	14	1.7
2016-09-12	23.0505	39.0979	Pelion	Faros Kavoulia	Serranus scriba	2	12	0.8
2016-09-12	23.0505	39.0979	Pelion	Faros Kavoulia	Serranus scriba	3	10	0.5
2016-09-12	23.0505	39.0979	Pelion	Faros Kavoulia	Serranus scriba	4	13	2.1
2016-09-12	23.0505	39.0979	Pelion	Faros Kavoulia	Serranus scriba	7	12	3.5
2016-09-12	23.0505	39.0979	Pelion	Faros Kavoulia	Diplodus vulgaris	1	15	5.4
2016-09-12	23.0505	39.0979	Pelion	Faros Kavoulia	Diplodus vulgaris	3	10	3.6
2016-09-12	23.0505	39.0979	Pelion	Faros Kavoulia	Diplodus vulgaris	4	13	5.9
2016-09-12	23.0505	39.0979	Pelion	Faros Kavoulia	Diplodus vulgaris	7	16	3.3
2016-09-12	23.0505	39.0979	Pelion	Faros Kavoulia	Diplodus vulgaris	3	14	4.1
2016-09-12	23.0505	39.0979	Pelion	Faros Kavoulia	Diplodus vulgaris	4	13	5.7
2016-09-12	23.0505	39.0979	Pelion	Faros Kavoulia	Serranus scriba	1	12	0.3
2016-09-12	23.0505	39.0979	Pelion	Faros Kavoulia	Serranus scriba	1	14	5.9
2016-09-12	23.0505	39.0979	Pelion	Faros Kavoulia	Serranus scriba	3	11	2.1
2016-09-12	23.0505	39.0979	Pelion	Faros Kavoulia	Serranus scriba	2	13	3.4
2016-09-12	23.0505	39.0979	Pelion	Faros Kavoulia	Serranus scriba	2	9	1.4
2016-09-12	23.0505	39.0979	Pelion	Faros Kavoulia	Serranus scriba	1	15	2.2
2016-09-12	23.0505	39.0979	Pelion	Faros Kavoulia	Serranus scriba	2	7	0.2
2016-09-12	23.0505	39.0979	Pelion	Faros Kavoulia	Serranus scriba	1	8	0.6
2016-09-12	23.0505	39.0979	Pelion	Faros Kavoulia	Serranus scriba	3	10	1.2
2016-09-12	23.0505	39.0979	Pelion	Faros Kavoulia	Diplodus vulgaris	3	14	4.3
2016-09-12	23.0505	39.0979	Pelion	Faros Kavoulia	Diplodus vulgaris	2	15	5.8
2016-09-12	23.0505	39.0979	Pelion	Faros Kavoulia	Diplodus vulgaris	2	11	2.2
2016-09-12	23.0505	39.0979	Pelion	Faros Kavoulia	Diplodus vulgaris	4	10	5.1
2016-09-12	23.0505	39.0979	Pelion	Faros Kavoulia	Diplodus vulgaris	2	13	6.1
2016-09-12	23.0505	39.0979	Pelion	Faros Kavoulia	Diplodus vulgaris	3	10	4.2
2016-09-12	23.0505	39.0979	Pelion	Faros Kavoulia	Serranus scriba	2	13	0.1
2016-09-12	23.0505	39.0979	Pelion	Faros Kavoulia	Serranus scriba	3	12	2.3
2016-09-12	23.0505	39.0979	Pelion	Faros Kavoulia	Serranus scriba	2	14	4.9
2016-09-12	23.0505	39.0979	Pelion	Faros Kavoulia	Serranus scriba	2	16	3.1
2016-09-14	23.7136	40.1755	Chalkidiki	Akti Kalogrias	Diplodus annularis	2	7	1.1
2016-09-14	23.7136	40.1755	Chalkidiki	Akti Kalogrias	Diplodus annularis	1	13	2.4
2016-09-14	23.7136	40.1755	Chalkidiki	Akti Kalogrias	Diplodus annularis	1	11	0.4
2016-09-14	23.7136	40.1755	Chalkidiki	Akti Kalogrias	Diplodus annularis	1	12	2.4
2016-09-14	23.7136	40.1755	Chalkidiki	Akti Kalogrias	Diplodus annularis	2	12	1.1
2016-09-14	23.7136	40.1755	Chalkidiki	Akti Kalogrias	Diplodus annularis	3	13	4.2
2016-09-14	23.7136	40.1755	Chalkidiki	Akti Kalogrias	Diplodus puntazzo	1	18	5.2
2016-09-14	23.7136	40.1755	Chalkidiki	Akti Kalogrias	Diplodus puntazzo	1	12	2.2
2016-09-14	23.7136	40.1755	Chalkidiki	Akti Kalogrias	Diplodus puntazzo	3	14	3.9
2016-09-14	23.7136	40.1755	Chalkidiki	Akti Kalogrias	Diplodus puntazzo	1	20	3.1
2016-09-14	23.7136	40.1755	Chalkidiki	Akti Kalogrias	Diplodus puntazzo	1	27	6.3
2016-09-14	23.7136	40.1755	Chalkidiki	Akti Kalogrias	Diplodus sargus	2	16	0.3
2016-09-14	23.7136	40.1755	Chalkidiki	Akti Kalogrias	Diplodus sargus	1	12	2.3
2016-09-14	23.7136	40.1755	Chalkidiki	Akti Kalogrias	Diplodus sargus	1	10	1.8
2016-09-14	23.7136	40.1755	Chalkidiki	Akti Kalogrias	Diplodus sargus	3	15	3.1
2016-09-14	23.7136	40.1755	Chalkidiki	Akti Kalogrias	Diplodus vulgaris	2	12	3.3
2016-09-14	23.7136	40.1755	Chalkidiki	Akti Kalogrias	Diplodus vulgaris	4	10	5.1
2016-09-14	23.7136	40.1755	Chalkidiki	Akti Kalogrias	Diplodus vulgaris	1	8	3.4
2016-09-14	23.7136	40.1755	Chalkidiki	Akti Kalogrias	Diplodus vulgaris	3	11	2.1
2016-09-14	23.7136	40.1755	Chalkidiki	Akti Kalogrias	Diplodus vulgaris	4	10	0.5
2016-09-14	23.7136	40.1755	Chalkidiki	Akti Kalogrias	Diplodus vulgaris	4	13	3.2
2016-09-14	23.7136	40.1755	Chalkidiki	Akti Kalogrias	Diplodus vulgaris	7	13	2.2
2016-09-14	23.7136	40.1755	Chalkidiki	Akti Kalogrias	Diplodus vulgaris	3	9	1.2
2016-09-14	23.7136	40.1755	Chalkidiki	Akti Kalogrias	Dentex dentex	4	13	3.1
2016-09-14	23.7136	40.1755	Chalkidiki	Akti Kalogrias	Epinephelus costae	1	7	0.5
2016-09-14	23.7136	40.1755	Chalkidiki	Akti Kalogrias	Epinephelus costae	1	9	0.1
2016-09-14	23.7136	40.1755	Chalkidiki	Akti Kalogrias	Epinephelus costae	1	13	1.2
2016-09-14	23.7136	40.1755	Chalkidiki	Akti Kalogrias	Epinephelus marginatus	1	15	0.1
2016-09-14	23.7136	40.1755	Chalkidiki	Akti Kalogrias	Mullus surmuletus	2	13	0.9
2016-09-14	23.7136	40.1755	Chalkidiki	Akti Kalogrias	Sarpa salpa	9	11	0.4
2016-09-14	23.7136	40.1755	Chalkidiki	Akti Kalogrias	Sarpa salpa	3	7	2.1
2016-09-14	23.7136	40.1755	Chalkidiki	Akti Kalogrias	Sarpa salpa	22	15	2.4
2016-09-14	23.7136	40.1755	Chalkidiki	Akti Kalogrias	Sarpa salpa	7	10	1.9
2016-09-14	23.7136	40.1755	Chalkidiki	Akti Kalogrias	Serranus scriba	1	9	4.2
2016-09-14	23.7136	40.1755	Chalkidiki	Akti Kalogrias	Serranus scriba	1	13	0.3
2016-09-14	23.7136	40.1755	Chalkidiki	Akti Kalogrias	Serranus scriba	1	10	0.5
2016-09-14	23.7136	40.1755	Chalkidiki	Akti Kalogrias	Serranus scriba	2	14	0.9
2016-09-14	23.7136	40.1755	Chalkidiki	Akti Kalogrias	Serranus scriba	3	12	1.4
2016-09-14	23.7136	40.1755	Chalkidiki	Akti Kalogrias	Serranus scriba	2	16	1.7
2016-09-14	23.7136	40.1755	Chalkidiki	Akti Kalogrias	Serranus scriba	4	10	3.1
2016-09-14	23.7136	40.1755	Chalkidiki	Akti Kalogrias	Diplodus annularis	3	10	0.4
2016-09-14	23.7136	40.1755	Chalkidiki	Akti Kalogrias	Diplodus annularis	2	12	1.1
2016-09-14	23.7136	40.1755	Chalkidiki	Akti Kalogrias	Diplodus annularis	3	10	2.7
2016-09-14	23.7136	40.1755	Chalkidiki	Akti Kalogrias	Diplodus annularis	5	11	6.9
2016-09-14	23.7136	40.1755	Chalkidiki	Akti Kalogrias	Diplodus puntazzo	3	14	1.4
2016-09-14	23.7136	40.1755	Chalkidiki	Akti Kalogrias	Diplodus puntazzo	1	18	0.3
2016-09-14	23.7136	40.1755	Chalkidiki	Akti Kalogrias	Diplodus puntazzo	4	12	0.3
2016-09-14	23.7136	40.1755	Chalkidiki	Akti Kalogrias	Diplodus puntazzo	2	19	0.9
2016-09-14	23.7136	40.1755	Chalkidiki	Akti Kalogrias	Diplodus sargus	3	15	0.2
2016-09-14	23.7136	40.1755	Chalkidiki	Akti Kalogrias	Diplodus vulgaris	1	8	3.5
2016-09-14	23.7136	40.1755	Chalkidiki	Akti Kalogrias	Diplodus vulgaris	4	10	1
2016-09-14	23.7136	40.1755	Chalkidiki	Akti Kalogrias	Diplodus vulgaris	18	15	4.3
2016-09-14	23.7136	40.1755	Chalkidiki	Akti Kalogrias	Diplodus vulgaris	12	14	1.2
2016-09-14	23.7136	40.1755	Chalkidiki	Akti Kalogrias	Diplodus vulgaris	10	17	1.2
2016-09-14	23.7136	40.1755	Chalkidiki	Akti Kalogrias	Diplodus vulgaris	14	11	0.8
2016-09-14	23.7136	40.1755	Chalkidiki	Akti Kalogrias	Diplodus vulgaris	15	14	0.4
2016-09-14	23.7136	40.1755	Chalkidiki	Akti Kalogrias	Diplodus vulgaris	10	10	1.4
2016-09-14	23.7136	40.1755	Chalkidiki	Akti Kalogrias	Diplodus vulgaris	5	11	4.1
2016-09-14	23.7136	40.1755	Chalkidiki	Akti Kalogrias	Epinephelus costae	1	7	0.2
2016-09-14	23.7136	40.1755	Chalkidiki	Akti Kalogrias	Epinephelus costae	1	11	0.2
2016-09-14	23.7136	40.1755	Chalkidiki	Akti Kalogrias	Mullus surmuletus	1	10	0.6
2016-09-14	23.7136	40.1755	Chalkidiki	Akti Kalogrias	Mullus surmuletus	1	12	1.6
2016-09-14	23.7136	40.1755	Chalkidiki	Akti Kalogrias	Mullus surmuletus	3	10	1.2
2016-09-14	23.7136	40.1755	Chalkidiki	Akti Kalogrias	Mullus surmuletus	2	13	0.4
2016-09-14	23.7136	40.1755	Chalkidiki	Akti Kalogrias	Oblada melanura	5	9	1.3
2016-09-14	23.7136	40.1755	Chalkidiki	Akti Kalogrias	Sarpa salpa	5	8	0.8
2016-09-14	23.7136	40.1755	Chalkidiki	Akti Kalogrias	Sarpa salpa	15	12	1.3
2016-09-14	23.7136	40.1755	Chalkidiki	Akti Kalogrias	Sarpa salpa	18	14	3.2
2016-09-14	23.7136	40.1755	Chalkidiki	Akti Kalogrias	Serranus scriba	1	15	1.8
2016-09-14	23.7136	40.1755	Chalkidiki	Akti Kalogrias	Serranus scriba	2	10	0.8
2016-09-14	23.7136	40.1755	Chalkidiki	Akti Kalogrias	Serranus scriba	1	12	1.5
2016-09-14	23.7136	40.1755	Chalkidiki	Akti Kalogrias	Serranus scriba	2	12	0.8
2016-09-14	23.7136	40.1755	Chalkidiki	Akti Kalogrias	Serranus scriba	4	10	1.3
2016-09-14	23.7136	40.1755	Chalkidiki	Akti Kalogrias	Serranus scriba	3	11	1.7
2016-09-14	23.7136	40.1755	Chalkidiki	Akti Kalogrias	Serranus scriba	4	15	4.2
2016-09-14	23.7136	40.1755	Chalkidiki	Akti Kalogrias	Serranus scriba	2	13	2.4
2016-09-14	23.7136	40.1755	Chalkidiki	Akti Kalogrias	Serranus scriba	1	15	0.1
2016-09-14	23.7136	40.1755	Chalkidiki	Akti Kalogrias	Serranus scriba	2	10	1.2
2016-09-14	23.7136	40.1755	Chalkidiki	Akti Kalogrias	Spondiliosoma cantharus	1	8	0.6
2016-09-14	23.7136	40.1755	Chalkidiki	Akti Kalogrias	Diplodus annularis	2	5	0.4
2016-09-14	23.7136	40.1755	Chalkidiki	Akti Kalogrias	Diplodus annularis	3	10	2.3
2016-09-14	23.7136	40.1755	Chalkidiki	Akti Kalogrias	Diplodus annularis	3	8	1.3
2016-09-14	23.7136	40.1755	Chalkidiki	Akti Kalogrias	Diplodus annularis	2	6	0.1
2016-09-14	23.7136	40.1755	Chalkidiki	Akti Kalogrias	Diplodus puntazzo	2	8	0.9
2016-09-14	23.7136	40.1755	Chalkidiki	Akti Kalogrias	Diplodus puntazzo	2	10	1.4
2016-09-14	23.7136	40.1755	Chalkidiki	Akti Kalogrias	Diplodus sargus	2	11	0.5
2016-09-14	23.7136	40.1755	Chalkidiki	Akti Kalogrias	Diplodus vulgaris	2	12	2.7
2016-09-14	23.7136	40.1755	Chalkidiki	Akti Kalogrias	Diplodus vulgaris	4	13	0.9
2016-09-14	23.7136	40.1755	Chalkidiki	Akti Kalogrias	Diplodus vulgaris	4	9	2.3
2016-09-14	23.7136	40.1755	Chalkidiki	Akti Kalogrias	Diplodus vulgaris	4	8	1.5
2016-09-14	23.7136	40.1755	Chalkidiki	Akti Kalogrias	Diplodus vulgaris	2	10	2.4
2016-09-14	23.7136	40.1755	Chalkidiki	Akti Kalogrias	Epinephelus costae	1	9	0.2
2016-09-14	23.7136	40.1755	Chalkidiki	Akti Kalogrias	Epinephelus costae	1	8	1.2
2016-09-14	23.7136	40.1755	Chalkidiki	Akti Kalogrias	Epinephelus costae	2	10	0.5
2016-09-14	23.7136	40.1755	Chalkidiki	Akti Kalogrias	Mullus surmuletus	17	15	7.2
2016-09-14	23.7136	40.1755	Chalkidiki	Akti Kalogrias	Mullus surmuletus	2	12	5.6
2016-09-14	23.7136	40.1755	Chalkidiki	Akti Kalogrias	Sarpa salpa	3	10	1.2
2016-09-14	23.7136	40.1755	Chalkidiki	Akti Kalogrias	Sarpa salpa	7	16	2.1
2016-09-14	23.7136	40.1755	Chalkidiki	Akti Kalogrias	Sarpa salpa	5	10	2.5
2016-09-14	23.7136	40.1755	Chalkidiki	Akti Kalogrias	Sarpa salpa	1	5	0.9
2016-09-14	23.7136	40.1755	Chalkidiki	Akti Kalogrias	Serranus scriba	2	11	0.4
2016-09-14	23.7136	40.1755	Chalkidiki	Akti Kalogrias	Serranus scriba	3	9	4.1
2016-09-14	23.7136	40.1755	Chalkidiki	Akti Kalogrias	Serranus scriba	2	11	5.1
2016-09-14	23.7136	40.1755	Chalkidiki	Akti Kalogrias	Serranus scriba	2	10	3.1
2016-09-14	23.7136	40.1755	Chalkidiki	Akti Kalogrias	Serranus scriba	2	13	1.1
2016-09-14	23.7136	40.1755	Chalkidiki	Akti Kalogrias	Serranus scriba	1	15	0.3
2016-09-14	23.7136	40.1755	Chalkidiki	Akti Kalogrias	Serranus scriba	3	14	2.6
2016-09-14	23.7136	40.1755	Chalkidiki	Akti Kalogrias	Serranus scriba	1	10	3.1
2016-09-14	23.7136	40.1755	Chalkidiki	Akti Kalogrias	Serranus scriba	2	12	1.4
2016-09-14	23.7136	40.1755	Chalkidiki	Akti Kalogrias	Serranus scriba	5	10	0.9
2016-09-14	23.7136	40.1755	Chalkidiki	Akti Kalogrias	Diplodus annularis	2	5	0.2
2016-09-14	23.7136	40.1755	Chalkidiki	Akti Kalogrias	Diplodus annularis	1	9	1.3
2016-09-14	23.7136	40.1755	Chalkidiki	Akti Kalogrias	Diplodus puntazzo	1	16	3.9
2016-09-14	23.7136	40.1755	Chalkidiki	Akti Kalogrias	Diplodus puntazzo	1	14	3.2
2016-09-14	23.7136	40.1755	Chalkidiki	Akti Kalogrias	Diplodus puntazzo	2	14	5.1
2016-09-14	23.7136	40.1755	Chalkidiki	Akti Kalogrias	Diplodus sargus	2	12	4.2
2016-09-14	23.7136	40.1755	Chalkidiki	Akti Kalogrias	Diplodus vulgaris	3	8	1.2
2016-09-14	23.7136	40.1755	Chalkidiki	Akti Kalogrias	Diplodus vulgaris	1	7	0.2
2016-09-14	23.7136	40.1755	Chalkidiki	Akti Kalogrias	Diplodus vulgaris	1	8	1.8
2016-09-14	23.7136	40.1755	Chalkidiki	Akti Kalogrias	Diplodus vulgaris	1	16	4.1
2016-09-14	23.7136	40.1755	Chalkidiki	Akti Kalogrias	Diplodus vulgaris	1	17	5
2016-09-14	23.7136	40.1755	Chalkidiki	Akti Kalogrias	Diplodus vulgaris	3	16	7.9
2016-09-14	23.7136	40.1755	Chalkidiki	Akti Kalogrias	Diplodus vulgaris	2	18	6.2
2016-09-14	23.7136	40.1755	Chalkidiki	Akti Kalogrias	Diplodus vulgaris	2	10	5.3
2016-09-14	23.7136	40.1755	Chalkidiki	Akti Kalogrias	Diplodus vulgaris	1	12	3.4
2016-09-14	23.7136	40.1755	Chalkidiki	Akti Kalogrias	Diplodus vulgaris	4	9	2.3
2016-09-14	23.7136	40.1755	Chalkidiki	Akti Kalogrias	Diplodus vulgaris	2	12	4.1
2016-09-14	23.7136	40.1755	Chalkidiki	Akti Kalogrias	Dentex dentex	1	15	1.1
2016-09-14	23.7136	40.1755	Chalkidiki	Akti Kalogrias	Dentex dentex	1	17	5.2
2016-09-14	23.7136	40.1755	Chalkidiki	Akti Kalogrias	Epinephelus costae	1	20	2.7
2016-09-14	23.7136	40.1755	Chalkidiki	Akti Kalogrias	Epinephelus costae	1	52	10
2016-09-14	23.7136	40.1755	Chalkidiki	Akti Kalogrias	Epinephelus costae	1	29	3.7
2016-09-14	23.7136	40.1755	Chalkidiki	Akti Kalogrias	Epinephelus costae	1	25	5.2
2016-09-14	23.7136	40.1755	Chalkidiki	Akti Kalogrias	Epinephelus costae	1	23	6.1
2016-09-14	23.7136	40.1755	Chalkidiki	Akti Kalogrias	Epinephelus costae	1	28	4.3
2016-09-14	23.7136	40.1755	Chalkidiki	Akti Kalogrias	Epinephelus marginatus	1	48	10.3
2016-09-14	23.7136	40.1755	Chalkidiki	Akti Kalogrias	Mullus surmuletus	2	16	5.6
2016-09-14	23.7136	40.1755	Chalkidiki	Akti Kalogrias	Oblada melanura	50	10	3.4
2016-09-14	23.7136	40.1755	Chalkidiki	Akti Kalogrias	Sarpa salpa	4	12	1.3
2016-09-14	23.7136	40.1755	Chalkidiki	Akti Kalogrias	Sarpa salpa	30	15	2.1
2016-09-14	23.7136	40.1755	Chalkidiki	Akti Kalogrias	Sarpa salpa	14	10	2.3
2016-09-14	23.7136	40.1755	Chalkidiki	Akti Kalogrias	Serranus scriba	2	11	1.8
2016-09-14	23.7136	40.1755	Chalkidiki	Akti Kalogrias	Serranus scriba	1	10	2.3
2016-09-14	23.7136	40.1755	Chalkidiki	Akti Kalogrias	Serranus scriba	1	8	0.5
2016-09-14	23.7136	40.1755	Chalkidiki	Akti Kalogrias	Serranus scriba	1	10	0.3
2016-09-14	23.7136	40.1755	Chalkidiki	Akti Kalogrias	Serranus scriba	2	12	6.1
2016-09-14	23.7136	40.1755	Chalkidiki	Akti Kalogrias	Serranus scriba	2	10	3.2
2016-09-14	23.7136	40.1755	Chalkidiki	Akti Kalogrias	Serranus scriba	2	10	3.1
2016-09-14	23.7136	40.1755	Chalkidiki	Akti Kalogrias	Serranus scriba	1	14	2.5
2016-09-14	23.7136	40.1755	Chalkidiki	Akti Kalogrias	Serranus scriba	3	12	2.9
2016-09-14	23.7136	40.1755	Chalkidiki	Akti Kalogrias	Serranus scriba	1	15	1.3
2016-09-14	23.7136	40.1755	Chalkidiki	Akti Kalogrias	Serranus scriba	1	13	3.4
2016-09-14	23.7136	40.1755	Chalkidiki	Akti Kalogrias	Serranus scriba	1	12	2.7
2016-09-14	23.7136	40.1755	Chalkidiki	Akti Kalogrias	Diplodus puntazzo	1	15	0.3
2016-09-14	23.7136	40.1755	Chalkidiki	Akti Kalogrias	Diplodus puntazzo	1	24	6.3
2016-09-14	23.7136	40.1755	Chalkidiki	Akti Kalogrias	Diplodus puntazzo	2	17	4.3
2016-09-14	23.7136	40.1755	Chalkidiki	Akti Kalogrias	Diplodus puntazzo	2	19	3.1
2016-09-14	23.7136	40.1755	Chalkidiki	Akti Kalogrias	Diplodus sargus	1	13	0.9
2016-09-14	23.7136	40.1755	Chalkidiki	Akti Kalogrias	Diplodus vulgaris	3	16	0.5
2016-09-14	23.7136	40.1755	Chalkidiki	Akti Kalogrias	Diplodus vulgaris	1	19	3.1
2016-09-14	23.7136	40.1755	Chalkidiki	Akti Kalogrias	Diplodus vulgaris	3	12	1.9
2016-09-14	23.7136	40.1755	Chalkidiki	Akti Kalogrias	Diplodus vulgaris	2	14	0.3
2016-09-14	23.7136	40.1755	Chalkidiki	Akti Kalogrias	Diplodus vulgaris	2	17	4.2
2016-09-14	23.7136	40.1755	Chalkidiki	Akti Kalogrias	Diplodus vulgaris	2	14	5.2
2016-09-14	23.7136	40.1755	Chalkidiki	Akti Kalogrias	Diplodus vulgaris	4	16	5.3
2016-09-14	23.7136	40.1755	Chalkidiki	Akti Kalogrias	Epinephelus costae	1	18	2.4
2016-09-14	23.7136	40.1755	Chalkidiki	Akti Kalogrias	Epinephelus costae	1	9	2.1
2016-09-14	23.7136	40.1755	Chalkidiki	Akti Kalogrias	Epinephelus costae	1	20	3.2
2016-09-14	23.7136	40.1755	Chalkidiki	Akti Kalogrias	Mullus surmuletus	3	15	2.3
2016-09-14	23.7136	40.1755	Chalkidiki	Akti Kalogrias	Mullus surmuletus	1	17	3.2
2016-09-14	23.7136	40.1755	Chalkidiki	Akti Kalogrias	Mullus surmuletus	2	10	0.8
2016-09-14	23.7136	40.1755	Chalkidiki	Akti Kalogrias	Sarpa salpa	12	13	5.7
2016-09-14	23.7136	40.1755	Chalkidiki	Akti Kalogrias	Serranus scriba	1	12	0.5
2016-09-14	23.7136	40.1755	Chalkidiki	Akti Kalogrias	Serranus scriba	1	15	2.3
2016-09-14	23.7136	40.1755	Chalkidiki	Akti Kalogrias	Serranus scriba	1	19	3.4
2016-09-14	23.7136	40.1755	Chalkidiki	Akti Kalogrias	Serranus scriba	1	18	0.1
2016-09-14	23.7136	40.1755	Chalkidiki	Akti Kalogrias	Serranus scriba	2	15	1.2
2016-09-14	23.7136	40.1755	Chalkidiki	Akti Kalogrias	Diplodus puntazzo	2	14	3.7
2016-09-14	23.7136	40.1755	Chalkidiki	Akti Kalogrias	Diplodus puntazzo	3	12	1.7
2016-09-14	23.7136	40.1755	Chalkidiki	Akti Kalogrias	Diplodus puntazzo	1	19	3.2
2016-09-14	23.7136	40.1755	Chalkidiki	Akti Kalogrias	Diplodus sargus	1	15	5.1
2016-09-14	23.7136	40.1755	Chalkidiki	Akti Kalogrias	Diplodus vulgaris	3	15	4.1
2016-09-14	23.7136	40.1755	Chalkidiki	Akti Kalogrias	Diplodus vulgaris	2	18	4.3
2016-09-14	23.7136	40.1755	Chalkidiki	Akti Kalogrias	Diplodus vulgaris	2	14	4.2
2016-09-14	23.7136	40.1755	Chalkidiki	Akti Kalogrias	Diplodus vulgaris	3	12	0.7
2016-09-14	23.7136	40.1755	Chalkidiki	Akti Kalogrias	Epinephelus marginatus	1	22	3.4
2016-09-14	23.7136	40.1755	Chalkidiki	Akti Kalogrias	Sarpa salpa	7	10	0.3
2016-09-14	23.7136	40.1755	Chalkidiki	Akti Kalogrias	Sarpa salpa	13	12	3.2
2016-09-14	23.7136	40.1755	Chalkidiki	Akti Kalogrias	Serranus scriba	1	18	0.4
2016-09-14	23.7136	40.1755	Chalkidiki	Akti Kalogrias	Serranus scriba	1	10	0.5
2016-09-14	23.7136	40.1755	Chalkidiki	Akti Kalogrias	Serranus scriba	4	18	3.2
2016-09-14	23.7136	40.1755	Chalkidiki	Akti Kalogrias	Serranus scriba	3	13	1.2
2016-09-14	23.7136	40.1755	Chalkidiki	Akti Kalogrias	Serranus scriba	2	16	3.1
2016-09-14	23.7136	40.1755	Chalkidiki	Akti Kalogrias	Serranus scriba	1	14	0.7
2016-09-14	23.7136	40.1755	Chalkidiki	Akti Kalogrias	Serranus scriba	2	10	3.1
2016-09-14	23.7136	40.1755	Chalkidiki	Akti Kalogrias	Serranus scriba	1	13	2.3
2016-09-15	23.8998	39.9625	Chalkidiki	Peristeronisi	Diplodus annularis	1	13	4.1
2016-09-15	23.8998	39.9625	Chalkidiki	Peristeronisi	Diplodus annularis	2	15	3.2
2016-09-15	23.8998	39.9625	Chalkidiki	Peristeronisi	Diplodus annularis	2	13	4.1
2016-09-15	23.8998	39.9625	Chalkidiki	Peristeronisi	Diplodus annularis	3	9	5.1
2016-09-15	23.8998	39.9625	Chalkidiki	Peristeronisi	Diplodus annularis	4	10	2.1
2016-09-15	23.8998	39.9625	Chalkidiki	Peristeronisi	Diplodus annularis	5	11	4.1
2016-09-15	23.8998	39.9625	Chalkidiki	Peristeronisi	Diplodus annularis	1	5	0.2
2016-09-15	23.8998	39.9625	Chalkidiki	Peristeronisi	Diplodus puntazzo	1	10	1.4
2016-09-15	23.8998	39.9625	Chalkidiki	Peristeronisi	Diplodus sargus	2	11	1.2
2016-09-15	23.8998	39.9625	Chalkidiki	Peristeronisi	Diplodus vulgaris	1	14	0.8
2016-09-15	23.8998	39.9625	Chalkidiki	Peristeronisi	Diplodus vulgaris	1	8	0.3
2016-09-15	23.8998	39.9625	Chalkidiki	Peristeronisi	Diplodus vulgaris	4	12	1.9
2016-09-15	23.8998	39.9625	Chalkidiki	Peristeronisi	Diplodus vulgaris	3	10	2.3
2016-09-15	23.8998	39.9625	Chalkidiki	Peristeronisi	Diplodus vulgaris	9	12	3.4
2016-09-15	23.8998	39.9625	Chalkidiki	Peristeronisi	Diplodus vulgaris	4	15	6.2
2016-09-15	23.8998	39.9625	Chalkidiki	Peristeronisi	Mullus surmuletus	2	13	3.2
2016-09-15	23.8998	39.9625	Chalkidiki	Peristeronisi	Mullus surmuletus	2	12	0.4
2016-09-15	23.8998	39.9625	Chalkidiki	Peristeronisi	Mullus surmuletus	2	10	1.3
2016-09-15	23.8998	39.9625	Chalkidiki	Peristeronisi	Oblada melanura	40	5	1.1
2016-09-15	23.8998	39.9625	Chalkidiki	Peristeronisi	Oblada melanura	5	5	2.1
2016-09-15	23.8998	39.9625	Chalkidiki	Peristeronisi	Sparisoma cretense	2	16	1.2
2016-09-15	23.8998	39.9625	Chalkidiki	Peristeronisi	Sarpa salpa	8	12	3.4
2016-09-15	23.8998	39.9625	Chalkidiki	Peristeronisi	Sarpa salpa	2	14	2.5
2016-09-15	23.8998	39.9625	Chalkidiki	Peristeronisi	Scorpaena porcus	1	8	0.7
2016-09-15	23.8998	39.9625	Chalkidiki	Peristeronisi	Serranus scriba	2	11	1.2
2016-09-15	23.8998	39.9625	Chalkidiki	Peristeronisi	Serranus scriba	3	13	2.6
2016-09-15	23.8998	39.9625	Chalkidiki	Peristeronisi	Serranus scriba	2	15	0.2
2016-09-15	23.8998	39.9625	Chalkidiki	Peristeronisi	Serranus scriba	4	13	1.4
2016-09-15	23.8998	39.9625	Chalkidiki	Peristeronisi	Diplodus annularis	4	11	0.2
2016-09-15	23.8998	39.9625	Chalkidiki	Peristeronisi	Diplodus annularis	5	9	1.4
2016-09-15	23.8998	39.9625	Chalkidiki	Peristeronisi	Diplodus annularis	2	9	1.4
2016-09-15	23.8998	39.9625	Chalkidiki	Peristeronisi	Diplodus annularis	3	7	2.3
2016-09-15	23.8998	39.9625	Chalkidiki	Peristeronisi	Diplodus annularis	1	6	0.4
2016-09-15	23.8998	39.9625	Chalkidiki	Peristeronisi	Diplodus sargus	2	13	4.8
2016-09-15	23.8998	39.9625	Chalkidiki	Peristeronisi	Diplodus sargus	3	12	2.3
2016-09-15	23.8998	39.9625	Chalkidiki	Peristeronisi	Diplodus sargus	3	10	2
2016-09-15	23.8998	39.9625	Chalkidiki	Peristeronisi	Diplodus sargus	2	12	2.3
2016-09-15	23.8998	39.9625	Chalkidiki	Peristeronisi	Diplodus vulgaris	5	12	0.4
2016-09-15	23.8998	39.9625	Chalkidiki	Peristeronisi	Diplodus vulgaris	13	11	2
2016-09-15	23.8998	39.9625	Chalkidiki	Peristeronisi	Diplodus vulgaris	3	14	0.3
2016-09-15	23.8998	39.9625	Chalkidiki	Peristeronisi	Mullus surmuletus	3	12	1.2
2016-09-15	23.8998	39.9625	Chalkidiki	Peristeronisi	Mullus surmuletus	2	10	0.9
2016-09-15	23.8998	39.9625	Chalkidiki	Peristeronisi	Oblada melanura	8	12	1.5
2016-09-15	23.8998	39.9625	Chalkidiki	Peristeronisi	Sparisoma cretense	1	15	1.5
2016-09-15	23.8998	39.9625	Chalkidiki	Peristeronisi	Sparisoma cretense	1	13	0.9
2016-09-15	23.8998	39.9625	Chalkidiki	Peristeronisi	Sparisoma cretense	2	12	4.1
2016-09-15	23.8998	39.9625	Chalkidiki	Peristeronisi	Sarpa salpa	5	16	3.9
2016-09-15	23.8998	39.9625	Chalkidiki	Peristeronisi	Sarpa salpa	7	8	1.2
2016-09-15	23.8998	39.9625	Chalkidiki	Peristeronisi	Sarpa salpa	1	10	2.2
2016-09-15	23.8998	39.9625	Chalkidiki	Peristeronisi	Sarpa salpa	3	8	0.4
2016-09-15	23.8998	39.9625	Chalkidiki	Peristeronisi	Scorpaena porcus	1	4	0.3
2016-09-15	23.8998	39.9625	Chalkidiki	Peristeronisi	Serranus scriba	2	12	0.9
2016-09-15	23.8998	39.9625	Chalkidiki	Peristeronisi	Serranus scriba	3	10	2.1
2016-09-15	23.8998	39.9625	Chalkidiki	Peristeronisi	Serranus scriba	2	10	0.2
2016-09-15	23.8998	39.9625	Chalkidiki	Peristeronisi	Serranus scriba	4	13	3.6
2016-09-15	23.8998	39.9625	Chalkidiki	Peristeronisi	Serranus scriba	3	9	4.1
2016-09-15	23.8998	39.9625	Chalkidiki	Peristeronisi	Serranus scriba	2	12	0.8
2016-09-15	23.8998	39.9625	Chalkidiki	Peristeronisi	Serranus scriba	1	8	0.4
2016-09-15	23.8998	39.9625	Chalkidiki	Peristeronisi	Serranus scriba	1	10	0.5
2016-09-15	23.8998	39.9625	Chalkidiki	Peristeronisi	Diplodus annularis	4	10	2.1
2016-09-15	23.8998	39.9625	Chalkidiki	Peristeronisi	Diplodus annularis	2	14	5.1
2016-09-15	23.8998	39.9625	Chalkidiki	Peristeronisi	Diplodus annularis	3	11	3.2
2016-09-15	23.8998	39.9625	Chalkidiki	Peristeronisi	Diplodus puntazzo	1	13	0.9
2016-09-15	23.8998	39.9625	Chalkidiki	Peristeronisi	Diplodus puntazzo	4	14	2.6
2016-09-15	23.8998	39.9625	Chalkidiki	Peristeronisi	Diplodus sargus	1	15	0.9
2016-09-15	23.8998	39.9625	Chalkidiki	Peristeronisi	Diplodus sargus	2	15	2.4
2016-09-15	23.8998	39.9625	Chalkidiki	Peristeronisi	Diplodus sargus	3	19	6.3
2016-09-15	23.8998	39.9625	Chalkidiki	Peristeronisi	Diplodus sargus	3	13	1.9
2016-09-15	23.8998	39.9625	Chalkidiki	Peristeronisi	Diplodus vulgaris	65	11	4.6
2016-09-15	23.8998	39.9625	Chalkidiki	Peristeronisi	Diplodus vulgaris	1	18	1.3
2016-09-15	23.8998	39.9625	Chalkidiki	Peristeronisi	Diplodus vulgaris	3	14	1.6
2016-09-15	23.8998	39.9625	Chalkidiki	Peristeronisi	Diplodus vulgaris	2	10	0.8
2016-09-15	23.8998	39.9625	Chalkidiki	Peristeronisi	Diplodus vulgaris	70	12	5.9
2016-09-15	23.8998	39.9625	Chalkidiki	Peristeronisi	Diplodus vulgaris	5	14	3.2
2016-09-15	23.8998	39.9625	Chalkidiki	Peristeronisi	Mullus surmuletus	2	14	1.2
2016-09-15	23.8998	39.9625	Chalkidiki	Peristeronisi	Oblada melanura	20	9	0.8
2016-09-15	23.8998	39.9625	Chalkidiki	Peristeronisi	Oblada melanura	6	13	4.2
2016-09-15	23.8998	39.9625	Chalkidiki	Peristeronisi	Sarpa salpa	5	13	2.4
2016-09-15	23.8998	39.9625	Chalkidiki	Peristeronisi	Serranus scriba	3	12	1.7
2016-09-15	23.8998	39.9625	Chalkidiki	Peristeronisi	Serranus scriba	1	15	0.4
2016-09-15	23.8998	39.9625	Chalkidiki	Peristeronisi	Serranus scriba	2	13	1.4
2016-09-15	23.8998	39.9625	Chalkidiki	Peristeronisi	Serranus scriba	4	12	2.3
2016-09-15	23.8998	39.9625	Chalkidiki	Peristeronisi	Diplodus annularis	1	12	3.1
2016-09-15	23.8998	39.9625	Chalkidiki	Peristeronisi	Diplodus annularis	2	9	2.7
2016-09-15	23.8998	39.9625	Chalkidiki	Peristeronisi	Diplodus annularis	1	10	1.9
2016-09-15	23.8998	39.9625	Chalkidiki	Peristeronisi	Diplodus vulgaris	2	13	3.2
2016-09-15	23.8998	39.9625	Chalkidiki	Peristeronisi	Diplodus vulgaris	1	12	2.4
2016-09-15	23.8998	39.9625	Chalkidiki	Peristeronisi	Diplodus vulgaris	50	13	6.2
2016-09-15	23.8998	39.9625	Chalkidiki	Peristeronisi	Diplodus vulgaris	2	14	4.8
2016-09-15	23.8998	39.9625	Chalkidiki	Peristeronisi	Epinephelus costae	1	18	4.8
2016-09-15	23.8998	39.9625	Chalkidiki	Peristeronisi	Mullus surmuletus	2	13	0.8
2016-09-15	23.8998	39.9625	Chalkidiki	Peristeronisi	Oblada melanura	6	15	4.2
2016-09-15	23.8998	39.9625	Chalkidiki	Peristeronisi	Sparisoma cretense	1	17	1.4
2016-09-15	23.8998	39.9625	Chalkidiki	Peristeronisi	Serranus scriba	3	11	2.1
2016-09-15	23.8998	39.9625	Chalkidiki	Peristeronisi	Serranus scriba	2	10	1.4
2016-09-15	23.8998	39.9625	Chalkidiki	Peristeronisi	Serranus scriba	1	13	0.8
2016-09-15	23.8998	39.9625	Chalkidiki	Peristeronisi	Serranus scriba	2	10	3.1
2016-09-15	23.8998	39.9625	Chalkidiki	Peristeronisi	Diplodus annularis	3	10	0.4
2016-09-15	23.8998	39.9625	Chalkidiki	Peristeronisi	Diplodus annularis	2	14	0.7
2016-09-15	23.8998	39.9625	Chalkidiki	Peristeronisi	Diplodus puntazzo	1	18	3.5
2016-09-15	23.8998	39.9625	Chalkidiki	Peristeronisi	Diplodus puntazzo	1	12	5.2
2016-09-15	23.8998	39.9625	Chalkidiki	Peristeronisi	Diplodus puntazzo	1	11	1.8
2016-09-15	23.8998	39.9625	Chalkidiki	Peristeronisi	Diplodus vulgaris	1	8	0.4
2016-09-15	23.8998	39.9625	Chalkidiki	Peristeronisi	Diplodus vulgaris	1	7	0.3
2016-09-15	23.8998	39.9625	Chalkidiki	Peristeronisi	Diplodus vulgaris	2	9	2.5
2016-09-15	23.8998	39.9625	Chalkidiki	Peristeronisi	Diplodus vulgaris	1	10	0.8
2016-09-15	23.8998	39.9625	Chalkidiki	Peristeronisi	Diplodus vulgaris	7	14	1.9
2016-09-15	23.8998	39.9625	Chalkidiki	Peristeronisi	Diplodus vulgaris	1	8	0.4
2016-09-15	23.8998	39.9625	Chalkidiki	Peristeronisi	Diplodus vulgaris	2	10	4.2
2016-09-15	23.8998	39.9625	Chalkidiki	Peristeronisi	Diplodus vulgaris	8	13	5.1
2016-09-15	23.8998	39.9625	Chalkidiki	Peristeronisi	Diplodus vulgaris	23	14	0.3
2016-09-15	23.8998	39.9625	Chalkidiki	Peristeronisi	Epinephelus costae	2	19	2.4
2016-09-15	23.8998	39.9625	Chalkidiki	Peristeronisi	Serranus scriba	1	9	1.3
2016-09-15	23.8998	39.9625	Chalkidiki	Peristeronisi	Serranus scriba	2	10	1.2
2016-09-15	23.8998	39.9625	Chalkidiki	Peristeronisi	Serranus scriba	1	14	3.6
2016-09-15	23.8998	39.9625	Chalkidiki	Peristeronisi	Serranus scriba	1	16	1.1
2016-09-15	23.8998	39.9625	Chalkidiki	Peristeronisi	Serranus scriba	1	13	0.4
2016-09-15	23.8998	39.9625	Chalkidiki	Peristeronisi	Serranus scriba	2	11	4.2
2016-09-15	23.8998	39.9625	Chalkidiki	Peristeronisi	Serranus scriba	2	14	0.6
2016-09-15	23.8998	39.9625	Chalkidiki	Peristeronisi	Serranus scriba	3	12	3.1
2016-09-15	23.8998	39.9625	Chalkidiki	Peristeronisi	Serranus scriba	2	10	1.7
2016-09-15	23.8998	39.9625	Chalkidiki	Peristeronisi	Serranus scriba	3	13	0.9
2016-09-15	23.8998	39.9625	Chalkidiki	Peristeronisi	Diplodus annularis	1	14	2.4
2016-09-15	23.8998	39.9625	Chalkidiki	Peristeronisi	Diplodus annularis	2	10	3.2
2016-09-15	23.8998	39.9625	Chalkidiki	Peristeronisi	Diplodus puntazzo	2	15	5.2
2016-09-15	23.8998	39.9625	Chalkidiki	Peristeronisi	Diplodus puntazzo	1	13	0.3
2016-09-15	23.8998	39.9625	Chalkidiki	Peristeronisi	Diplodus puntazzo	1	12	1.3
2016-09-15	23.8998	39.9625	Chalkidiki	Peristeronisi	Diplodus sargus	3	13	1.4
2016-09-15	23.8998	39.9625	Chalkidiki	Peristeronisi	Diplodus vulgaris	5	10	0.7
2016-09-15	23.8998	39.9625	Chalkidiki	Peristeronisi	Diplodus vulgaris	6	12	1.3
2016-09-15	23.8998	39.9625	Chalkidiki	Peristeronisi	Diplodus vulgaris	2	13	1.4
2016-09-15	23.8998	39.9625	Chalkidiki	Peristeronisi	Diplodus vulgaris	75	14	4.7
2016-09-15	23.8998	39.9625	Chalkidiki	Peristeronisi	Diplodus vulgaris	10	7	0.2
2016-09-15	23.8998	39.9625	Chalkidiki	Peristeronisi	Mullus surmuletus	1	15	0.8
2016-09-15	23.8998	39.9625	Chalkidiki	Peristeronisi	Mullus surmuletus	3	13	1.3
2016-09-15	23.8998	39.9625	Chalkidiki	Peristeronisi	Sarpa salpa	6	12	4.3
2016-09-15	23.8998	39.9625	Chalkidiki	Peristeronisi	Serranus scriba	3	11	1.8
2016-09-15	23.8998	39.9625	Chalkidiki	Peristeronisi	Serranus scriba	2	10	2.6
2016-09-15	23.8998	39.9625	Chalkidiki	Peristeronisi	Serranus scriba	3	10	4.2
2016-09-15	23.8998	39.9625	Chalkidiki	Peristeronisi	Serranus scriba	2	14	5.1
2016-09-15	23.8998	39.9625	Chalkidiki	Peristeronisi	Serranus scriba	2	13	0.6
2016-09-15	23.8998	39.9625	Chalkidiki	Peristeronisi	Serranus scriba	3	14	4.1
2016-09-15	23.8998	39.9625	Chalkidiki	Peristeronisi	Serranus scriba	2	10	3.2
2016-09-15	23.8998	39.9625	Chalkidiki	Peristeronisi	Serranus scriba	3	12	0.5
2016-09-15	23.8998	39.9625	Chalkidiki	Peristeronisi	Serranus scriba	2	11	1.4
2016-09-16	23.9552	40.3069	Chalkidiki	Drenia	Diplodus annularis	2	10	1.4
2016-09-16	23.9552	40.3069	Chalkidiki	Drenia	Diplodus annularis	1	13	4.1
2016-09-16	23.9552	40.3069	Chalkidiki	Drenia	Diplodus puntazzo	1	14	0.6
2016-09-16	23.9552	40.3069	Chalkidiki	Drenia	Diplodus puntazzo	1	10	1.1
2016-09-16	23.9552	40.3069	Chalkidiki	Drenia	Diplodus vulgaris	2	11	1.2
2016-09-16	23.9552	40.3069	Chalkidiki	Drenia	Diplodus vulgaris	2	14	1.4
2016-09-16	23.9552	40.3069	Chalkidiki	Drenia	Diplodus vulgaris	2	15	0.9
2016-09-16	23.9552	40.3069	Chalkidiki	Drenia	Diplodus vulgaris	3	8	0.6
2016-09-16	23.9552	40.3069	Chalkidiki	Drenia	Diplodus vulgaris	3	9	2.2
2016-09-16	23.9552	40.3069	Chalkidiki	Drenia	Diplodus vulgaris	5	12	0.8
2016-09-16	23.9552	40.3069	Chalkidiki	Drenia	Diplodus vulgaris	2	10	1.2
2016-09-16	23.9552	40.3069	Chalkidiki	Drenia	Oblada melanura	15	13	1.2
2016-09-16	23.9552	40.3069	Chalkidiki	Drenia	Oblada melanura	13	11	0.5
2016-09-16	23.9552	40.3069	Chalkidiki	Drenia	Oblada melanura	10	15	1.5
2016-09-16	23.9552	40.3069	Chalkidiki	Drenia	Oblada melanura	18	9	2.4
2016-09-16	23.9552	40.3069	Chalkidiki	Drenia	Sarpa salpa	5	11	0.7
2016-09-16	23.9552	40.3069	Chalkidiki	Drenia	Sarpa salpa	1	5	0.4
2016-09-16	23.9552	40.3069	Chalkidiki	Drenia	Sarpa salpa	13	15	0.1
2016-09-16	23.9552	40.3069	Chalkidiki	Drenia	Serranus scriba	2	13	3.1
2016-09-16	23.9552	40.3069	Chalkidiki	Drenia	Serranus scriba	3	11	1.1
2016-09-16	23.9552	40.3069	Chalkidiki	Drenia	Serranus scriba	2	12	1.9
2016-09-16	23.9552	40.3069	Chalkidiki	Drenia	Serranus scriba	1	15	2.3
2016-09-16	23.9552	40.3069	Chalkidiki	Drenia	Serranus scriba	2	16	3
2016-09-16	23.9552	40.3069	Chalkidiki	Drenia	Diplodus annularis	1	10	2.7
2016-09-16	23.9552	40.3069	Chalkidiki	Drenia	Diplodus annularis	2	13	1.6
2016-09-16	23.9552	40.3069	Chalkidiki	Drenia	Diplodus annularis	1	13	2.4
2016-09-16	23.9552	40.3069	Chalkidiki	Drenia	Diplodus annularis	2	10	1.7
2016-09-16	23.9552	40.3069	Chalkidiki	Drenia	Diplodus annularis	1	10	2.1
2016-09-16	23.9552	40.3069	Chalkidiki	Drenia	Diplodus puntazzo	1	10	2.2
2016-09-16	23.9552	40.3069	Chalkidiki	Drenia	Diplodus puntazzo	1	11	1.4
2016-09-16	23.9552	40.3069	Chalkidiki	Drenia	Diplodus vulgaris	2	13	1.2
2016-09-16	23.9552	40.3069	Chalkidiki	Drenia	Diplodus vulgaris	3	11	0.7
2016-09-16	23.9552	40.3069	Chalkidiki	Drenia	Diplodus vulgaris	4	10	3
2016-09-16	23.9552	40.3069	Chalkidiki	Drenia	Diplodus vulgaris	3	11	1.5
2016-09-16	23.9552	40.3069	Chalkidiki	Drenia	Diplodus vulgaris	3	7	2.4
2016-09-16	23.9552	40.3069	Chalkidiki	Drenia	Diplodus vulgaris	2	14	1.9
2016-09-16	23.9552	40.3069	Chalkidiki	Drenia	Diplodus vulgaris	2	10	0.7
2016-09-16	23.9552	40.3069	Chalkidiki	Drenia	Diplodus vulgaris	2	14	0.3
2016-09-16	23.9552	40.3069	Chalkidiki	Drenia	Sarpa salpa	6	14	3.3
2016-09-16	23.9552	40.3069	Chalkidiki	Drenia	Sarpa salpa	4	9	1.5
2016-09-16	23.9552	40.3069	Chalkidiki	Drenia	Sarpa salpa	2	15	3.1
2016-09-16	23.9552	40.3069	Chalkidiki	Drenia	Sarpa salpa	2	13	1.7
2016-09-16	23.9552	40.3069	Chalkidiki	Drenia	Sarpa salpa	3	18	1.2
2016-09-16	23.9552	40.3069	Chalkidiki	Drenia	Serranus scriba	4	13	0.8
2016-09-16	23.9552	40.3069	Chalkidiki	Drenia	Serranus scriba	2	15	1.1
2016-09-16	23.9552	40.3069	Chalkidiki	Drenia	Serranus scriba	3	12	1.2
2016-09-16	23.9552	40.3069	Chalkidiki	Drenia	Serranus scriba	2	11	0.8
2016-09-16	23.9552	40.3069	Chalkidiki	Drenia	Serranus scriba	1	14	0.1
2016-09-16	23.9552	40.3069	Chalkidiki	Drenia	Diplodus annularis	1	16	2.1
2016-09-16	23.9552	40.3069	Chalkidiki	Drenia	Diplodus annularis	3	13	0.8
2016-09-16	23.9552	40.3069	Chalkidiki	Drenia	Diplodus puntazzo	1	15	0.7
2016-09-16	23.9552	40.3069	Chalkidiki	Drenia	Diplodus sargus	2	14	1.6
2016-09-16	23.9552	40.3069	Chalkidiki	Drenia	Diplodus vulgaris	6	13	0.4
2016-09-16	23.9552	40.3069	Chalkidiki	Drenia	Diplodus vulgaris	3	15	0.5
2016-09-16	23.9552	40.3069	Chalkidiki	Drenia	Diplodus vulgaris	5	10	1.3
2016-09-16	23.9552	40.3069	Chalkidiki	Drenia	Diplodus vulgaris	4	12	0.6
2016-09-16	23.9552	40.3069	Chalkidiki	Drenia	Diplodus vulgaris	3	11	0.9
2016-09-16	23.9552	40.3069	Chalkidiki	Drenia	Diplodus vulgaris	4	13	2.4
2016-09-16	23.9552	40.3069	Chalkidiki	Drenia	Diplodus vulgaris	3	13	0.2
2016-09-16	23.9552	40.3069	Chalkidiki	Drenia	Diplodus vulgaris	8	11	1.4
2016-09-16	23.9552	40.3069	Chalkidiki	Drenia	Diplodus vulgaris	2	14	2.9
2016-09-16	23.9552	40.3069	Chalkidiki	Drenia	Diplodus vulgaris	2	10	1.2
2016-09-16	23.9552	40.3069	Chalkidiki	Drenia	Diplodus vulgaris	4	12	1.3
2016-09-16	23.9552	40.3069	Chalkidiki	Drenia	Muraena helena	1	95	1.2
2016-09-16	23.9552	40.3069	Chalkidiki	Drenia	Oblada melanura	20	6	1.4
2016-09-16	23.9552	40.3069	Chalkidiki	Drenia	Sarpa salpa	3	17	1.9
2016-09-16	23.9552	40.3069	Chalkidiki	Drenia	Sarpa salpa	5	19	2.3
2016-09-16	23.9552	40.3069	Chalkidiki	Drenia	Sarpa salpa	3	18	1.5
2016-09-16	23.9552	40.3069	Chalkidiki	Drenia	Sarpa salpa	6	14	5.9
2016-09-16	23.9552	40.3069	Chalkidiki	Drenia	Serranus scriba	3	12	0.5
2016-09-16	23.9552	40.3069	Chalkidiki	Drenia	Serranus scriba	2	13	2.1
2016-09-16	23.9552	40.3069	Chalkidiki	Drenia	Serranus scriba	1	15	3.2
2016-09-16	23.9552	40.3069	Chalkidiki	Drenia	Diplodus annularis	3	7	1.1
2016-09-16	23.9552	40.3069	Chalkidiki	Drenia	Diplodus puntazzo	1	12	2.3
2016-09-16	23.9552	40.3069	Chalkidiki	Drenia	Diplodus sargus	2	14	1.2
2016-09-16	23.9552	40.3069	Chalkidiki	Drenia	Diplodus vulgaris	5	9	0.4
2016-09-16	23.9552	40.3069	Chalkidiki	Drenia	Diplodus vulgaris	3	10	1.3
2016-09-16	23.9552	40.3069	Chalkidiki	Drenia	Muraena helena	1	87	0.5
2016-09-16	23.9552	40.3069	Chalkidiki	Drenia	Sarpa salpa	6	8	2.3
2016-09-16	23.9552	40.3069	Chalkidiki	Drenia	Sarpa salpa	3	13	1.4
2016-09-16	23.9552	40.3069	Chalkidiki	Drenia	Sarpa salpa	4	11	0.4
2016-09-16	23.9552	40.3069	Chalkidiki	Drenia	Sarpa salpa	10	13	2.1
2016-09-16	23.9552	40.3069	Chalkidiki	Drenia	Serranus scriba	2	11	1.8
2016-09-16	23.9552	40.3069	Chalkidiki	Drenia	Serranus scriba	3	13	0.7
2016-09-16	23.9552	40.3069	Chalkidiki	Drenia	Serranus scriba	2	10	0.4
2016-09-16	23.9552	40.3069	Chalkidiki	Drenia	Serranus scriba	4	11	3.2
2016-09-16	23.9552	40.3069	Chalkidiki	Drenia	Serranus scriba	1	9	0.3
2016-09-16	23.9552	40.3069	Chalkidiki	Drenia	Diplodus annularis	2	11	6.9
2016-09-16	23.9552	40.3069	Chalkidiki	Drenia	Diplodus vulgaris	2	12	0.4
2016-09-16	23.9552	40.3069	Chalkidiki	Drenia	Diplodus vulgaris	3	9	1.3
2016-09-16	23.9552	40.3069	Chalkidiki	Drenia	Diplodus vulgaris	1	16	0.3
2016-09-16	23.9552	40.3069	Chalkidiki	Drenia	Diplodus vulgaris	3	12	2.4
2016-09-16	23.9552	40.3069	Chalkidiki	Drenia	Oblada melanura	1	13	5.4
2016-09-16	23.9552	40.3069	Chalkidiki	Drenia	Sarpa salpa	7	10	3.1
2016-09-16	23.9552	40.3069	Chalkidiki	Drenia	Sarpa salpa	11	14	5.2
2016-09-16	23.9552	40.3069	Chalkidiki	Drenia	Serranus scriba	2	12	1.2
2016-09-16	23.9552	40.3069	Chalkidiki	Drenia	Serranus scriba	3	11	0.4
2016-09-16	23.9552	40.3069	Chalkidiki	Drenia	Serranus scriba	3	14	4.2
2016-09-16	23.9552	40.3069	Chalkidiki	Drenia	Serranus scriba	2	13	2.4
2016-09-16	23.9552	40.3069	Chalkidiki	Drenia	Serranus scriba	2	12	0.2
2016-09-16	23.9552	40.3069	Chalkidiki	Drenia	Diplodus annularis	2	13	6.9
2016-09-16	23.9552	40.3069	Chalkidiki	Drenia	Diplodus annularis	1	8	1.2
2016-09-16	23.9552	40.3069	Chalkidiki	Drenia	Diplodus annularis	1	10	1.2
2016-09-16	23.9552	40.3069	Chalkidiki	Drenia	Diplodus annularis	1	15	4.5
2016-09-16	23.9552	40.3069	Chalkidiki	Drenia	Diplodus annularis	2	13	2.6
2016-09-16	23.9552	40.3069	Chalkidiki	Drenia	Diplodus annularis	1	17	1.2
2016-09-16	23.9552	40.3069	Chalkidiki	Drenia	Diplodus puntazzo	1	10	4.3
2016-09-16	23.9552	40.3069	Chalkidiki	Drenia	Diplodus sargus	1	13	3.4
2016-09-16	23.9552	40.3069	Chalkidiki	Drenia	Diplodus vulgaris	4	9	5.2
2016-09-16	23.9552	40.3069	Chalkidiki	Drenia	Diplodus vulgaris	3	12	3.7
2016-09-16	23.9552	40.3069	Chalkidiki	Drenia	Diplodus vulgaris	2	14	3.1
2016-09-16	23.9552	40.3069	Chalkidiki	Drenia	Diplodus vulgaris	3	9	4.2
2016-09-16	23.9552	40.3069	Chalkidiki	Drenia	Diplodus vulgaris	4	13	1.2
2016-09-16	23.9552	40.3069	Chalkidiki	Drenia	Diplodus vulgaris	2	10	3.1
2016-09-16	23.9552	40.3069	Chalkidiki	Drenia	Mullus surmuletus	2	14	2.3
2016-09-16	23.9552	40.3069	Chalkidiki	Drenia	Muraena helena	1	95	3.4
2016-09-16	23.9552	40.3069	Chalkidiki	Drenia	Muraena helena	1	130	2.2
2016-09-16	23.9552	40.3069	Chalkidiki	Drenia	Oblada melanura	2	14	6.4
2016-09-16	23.9552	40.3069	Chalkidiki	Drenia	Oblada melanura	3	13	3.2
2016-09-16	23.9552	40.3069	Chalkidiki	Drenia	Serranus scriba	1	14	1.3
2016-09-16	23.9552	40.3069	Chalkidiki	Drenia	Serranus scriba	4	13	6.2
2016-09-16	23.9552	40.3069	Chalkidiki	Drenia	Serranus scriba	3	12	1.4
2016-09-16	23.9552	40.3069	Chalkidiki	Drenia	Serranus scriba	2	10	0.4
2016-09-16	23.944	40.3078	Chalkidiki	Astakos	Diplodus annularis	3	12	0.9
2016-09-16	23.944	40.3078	Chalkidiki	Astakos	Diplodus annularis	1	14	2.3
2016-09-16	23.944	40.3078	Chalkidiki	Astakos	Diplodus annularis	4	10	2.6
2016-09-16	23.944	40.3078	Chalkidiki	Astakos	Diplodus annularis	3	9	1.7
2016-09-16	23.944	40.3078	Chalkidiki	Astakos	Diplodus puntazzo	1	14	1.4
2016-09-16	23.944	40.3078	Chalkidiki	Astakos	Diplodus puntazzo	1	12	0.9
2016-09-16	23.944	40.3078	Chalkidiki	Astakos	Diplodus vulgaris	5	14	1.2
2016-09-16	23.944	40.3078	Chalkidiki	Astakos	Diplodus vulgaris	9	12	3.5
2016-09-16	23.944	40.3078	Chalkidiki	Astakos	Diplodus vulgaris	7	11	3.1
2016-09-16	23.944	40.3078	Chalkidiki	Astakos	Diplodus vulgaris	10	12	2.9
2016-09-16	23.944	40.3078	Chalkidiki	Astakos	Diplodus vulgaris	3	16	1.2
2016-09-16	23.944	40.3078	Chalkidiki	Astakos	Diplodus vulgaris	25	14	3.1
2016-09-16	23.944	40.3078	Chalkidiki	Astakos	Oblada melanura	10	11	2.3
2016-09-16	23.944	40.3078	Chalkidiki	Astakos	Oblada melanura	60	7	1.8
2016-09-16	23.944	40.3078	Chalkidiki	Astakos	Oblada melanura	12	15	3.9
2016-09-16	23.944	40.3078	Chalkidiki	Astakos	Sarpa salpa	3	9	1.7
2016-09-16	23.944	40.3078	Chalkidiki	Astakos	Sarpa salpa	5	10	0.8
2016-09-16	23.944	40.3078	Chalkidiki	Astakos	Sarpa salpa	4	7	0.9
2016-09-16	23.944	40.3078	Chalkidiki	Astakos	Sarpa salpa	6	10	2.5
2016-09-16	23.944	40.3078	Chalkidiki	Astakos	Sarpa salpa	16	18	5.5
2016-09-16	23.944	40.3078	Chalkidiki	Astakos	Sciaena umbra	1	20	0.4
2016-09-16	23.944	40.3078	Chalkidiki	Astakos	Serranus scriba	2	15	1.6
2016-09-16	23.944	40.3078	Chalkidiki	Astakos	Serranus scriba	3	14	0.5
2016-09-16	23.944	40.3078	Chalkidiki	Astakos	Serranus scriba	2	12	1.4
2016-09-16	23.944	40.3078	Chalkidiki	Astakos	Diplodus annularis	2	10	0.6
2016-09-16	23.944	40.3078	Chalkidiki	Astakos	Diplodus annularis	4	12	1.3
2016-09-16	23.944	40.3078	Chalkidiki	Astakos	Diplodus annularis	2	9	4.1
2016-09-16	23.944	40.3078	Chalkidiki	Astakos	Diplodus annularis	2	12	3.1
2016-09-16	23.944	40.3078	Chalkidiki	Astakos	Diplodus puntazzo	2	10	2.2
2016-09-16	23.944	40.3078	Chalkidiki	Astakos	Diplodus vulgaris	4	12	2.2
2016-09-16	23.944	40.3078	Chalkidiki	Astakos	Diplodus vulgaris	3	10	0.3
2016-09-16	23.944	40.3078	Chalkidiki	Astakos	Diplodus vulgaris	9	13	1.1
2016-09-16	23.944	40.3078	Chalkidiki	Astakos	Diplodus vulgaris	10	11	2.3
2016-09-16	23.944	40.3078	Chalkidiki	Astakos	Oblada melanura	9	13	3.7
2016-09-16	23.944	40.3078	Chalkidiki	Astakos	Oblada melanura	15	6	0.3
2016-09-16	23.944	40.3078	Chalkidiki	Astakos	Sarpa salpa	5	16	4.8
2016-09-16	23.944	40.3078	Chalkidiki	Astakos	Sarpa salpa	4	13	3.1
2016-09-16	23.944	40.3078	Chalkidiki	Astakos	Serranus scriba	3	11	5.6
2016-09-16	23.944	40.3078	Chalkidiki	Astakos	Serranus scriba	2	14	4.8
2016-09-16	23.944	40.3078	Chalkidiki	Astakos	Serranus scriba	2	14	3.1
2016-09-16	23.944	40.3078	Chalkidiki	Astakos	Serranus scriba	2	10	1.4
2016-09-16	23.944	40.3078	Chalkidiki	Astakos	Serranus scriba	5	12	3.3
2016-09-16	23.944	40.3078	Chalkidiki	Astakos	Serranus scriba	4	11	2.4
2016-09-16	23.944	40.3078	Chalkidiki	Astakos	Diplodus annularis	3	11	2.4
2016-09-16	23.944	40.3078	Chalkidiki	Astakos	Diplodus annularis	4	10	1.3
2016-09-16	23.944	40.3078	Chalkidiki	Astakos	Diplodus puntazzo	3	14	4.8
2016-09-16	23.944	40.3078	Chalkidiki	Astakos	Diplodus sargus	1	13	1.7
2016-09-16	23.944	40.3078	Chalkidiki	Astakos	Diplodus sargus	2	15	6.1
2016-09-16	23.944	40.3078	Chalkidiki	Astakos	Diplodus sargus	1	14	1.6
2016-09-16	23.944	40.3078	Chalkidiki	Astakos	Diplodus sargus	3	11	2.1
2016-09-16	23.944	40.3078	Chalkidiki	Astakos	Diplodus sargus	2	13	3.6
2016-09-16	23.944	40.3078	Chalkidiki	Astakos	Diplodus sargus	17	14	5.1
2016-09-16	23.944	40.3078	Chalkidiki	Astakos	Oblada melanura	6	7	1.1
2016-09-16	23.944	40.3078	Chalkidiki	Astakos	Sarpa salpa	6	17	3.2
2016-09-16	23.944	40.3078	Chalkidiki	Astakos	Sarpa salpa	5	8	0.6
2016-09-16	23.944	40.3078	Chalkidiki	Astakos	Sarpa salpa	7	10	1.2
2016-09-16	23.944	40.3078	Chalkidiki	Astakos	Serranus scriba	4	12	1.9
2016-09-16	23.944	40.3078	Chalkidiki	Astakos	Serranus scriba	2	14	0.8
2016-09-16	23.944	40.3078	Chalkidiki	Astakos	Serranus scriba	3	11	0.7
2016-09-16	23.944	40.3078	Chalkidiki	Astakos	Diplodus annularis	1	10	1.7
2016-09-16	23.944	40.3078	Chalkidiki	Astakos	Diplodus annularis	1	12	2.3
2016-09-16	23.944	40.3078	Chalkidiki	Astakos	Diplodus puntazzo	1	18	2.1
2016-09-16	23.944	40.3078	Chalkidiki	Astakos	Diplodus sargus	2	16	0.5
2016-09-16	23.944	40.3078	Chalkidiki	Astakos	Diplodus sargus	1	12	4.4
2016-09-16	23.944	40.3078	Chalkidiki	Astakos	Diplodus vulgaris	3	16	0.6
2016-09-16	23.944	40.3078	Chalkidiki	Astakos	Diplodus vulgaris	1	13	4.7
2016-09-16	23.944	40.3078	Chalkidiki	Astakos	Diplodus vulgaris	2	22	1.5
2016-09-16	23.944	40.3078	Chalkidiki	Astakos	Diplodus vulgaris	4	11	3.9
2016-09-16	23.944	40.3078	Chalkidiki	Astakos	Diplodus vulgaris	1	25	3.2
2016-09-16	23.944	40.3078	Chalkidiki	Astakos	Diplodus vulgaris	4	9	0.9
2016-09-16	23.944	40.3078	Chalkidiki	Astakos	Diplodus vulgaris	7	14	1.5
2016-09-16	23.944	40.3078	Chalkidiki	Astakos	Muraena helena	1	120	3.8
2016-09-16	23.944	40.3078	Chalkidiki	Astakos	Mullus surmuletus	2	8	0.1
2016-09-16	23.944	40.3078	Chalkidiki	Astakos	Serranus scriba	1	8	0.1
2016-09-16	23.944	40.3078	Chalkidiki	Astakos	Serranus scriba	3	13	2.2
2016-09-16	23.944	40.3078	Chalkidiki	Astakos	Diplodus puntazzo	1	11	4.1
2016-09-16	23.944	40.3078	Chalkidiki	Astakos	Diplodus vulgaris	6	14	2.1
2016-09-16	23.944	40.3078	Chalkidiki	Astakos	Diplodus vulgaris	1	11	3.2
2016-09-16	23.944	40.3078	Chalkidiki	Astakos	Diplodus vulgaris	2	12	1.4
2016-09-16	23.944	40.3078	Chalkidiki	Astakos	Diplodus vulgaris	9	13	4.5
2016-09-16	23.944	40.3078	Chalkidiki	Astakos	Diplodus vulgaris	2	9	1.8
2016-09-16	23.944	40.3078	Chalkidiki	Astakos	Diplodus vulgaris	1	18	6.9
2016-09-16	23.944	40.3078	Chalkidiki	Astakos	Epinephelus costae	1	23	4.1
2016-09-16	23.944	40.3078	Chalkidiki	Astakos	Mullus surmuletus	1	14	1.3
2016-09-16	23.944	40.3078	Chalkidiki	Astakos	Mullus surmuletus	1	13	2.1
2016-09-16	23.944	40.3078	Chalkidiki	Astakos	Sarpa salpa	8	11	3.1
2016-09-16	23.944	40.3078	Chalkidiki	Astakos	Serranus scriba	3	12	0.4
2016-09-16	23.944	40.3078	Chalkidiki	Astakos	Serranus scriba	2	13	2
2016-09-16	23.944	40.3078	Chalkidiki	Astakos	Serranus scriba	2	18	2.4
2016-09-16	23.944	40.3078	Chalkidiki	Astakos	Serranus scriba	2	10	1.4
2016-09-16	23.944	40.3078	Chalkidiki	Astakos	Serranus scriba	1	15	0.7
2016-09-16	23.944	40.3078	Chalkidiki	Astakos	Serranus scriba	3	15	4.1
2016-09-16	23.944	40.3078	Chalkidiki	Astakos	Serranus scriba	3	12	1.7
2016-09-16	23.944	40.3078	Chalkidiki	Astakos	Serranus scriba	2	14	3.6
2016-09-16	23.944	40.3078	Chalkidiki	Astakos	Serranus scriba	1	7	0.2
2016-09-16	23.944	40.3078	Chalkidiki	Astakos	Diplodus annularis	1	11	0.2
2016-09-16	23.944	40.3078	Chalkidiki	Astakos	Diplodus annularis	1	10	1.1
2016-09-16	23.944	40.3078	Chalkidiki	Astakos	Diplodus vulgaris	2	12	1.3
2016-09-16	23.944	40.3078	Chalkidiki	Astakos	Diplodus vulgaris	6	9	0.3
2016-09-16	23.944	40.3078	Chalkidiki	Astakos	Diplodus vulgaris	2	10	1.3
2016-09-16	23.944	40.3078	Chalkidiki	Astakos	Diplodus vulgaris	1	12	0.9
2016-09-16	23.944	40.3078	Chalkidiki	Astakos	Diplodus vulgaris	6	14	1.5
2016-09-16	23.944	40.3078	Chalkidiki	Astakos	Diplodus vulgaris	3	11	2.4
2016-09-16	23.944	40.3078	Chalkidiki	Astakos	Diplodus vulgaris	14	10	2.2
2016-09-16	23.944	40.3078	Chalkidiki	Astakos	Sarpa salpa	5	21	1.7
2016-09-16	23.944	40.3078	Chalkidiki	Astakos	Sarpa salpa	3	15	1.7
2016-09-16	23.944	40.3078	Chalkidiki	Astakos	Scorpaena porcus	1	9	0.1
2016-09-16	23.944	40.3078	Chalkidiki	Astakos	Serranus scriba	3	15	2.4
2016-09-16	23.944	40.3078	Chalkidiki	Astakos	Serranus scriba	1	12	0.2
2016-09-16	23.944	40.3078	Chalkidiki	Astakos	Serranus scriba	2	11	1.9
2016-09-16	23.944	40.3078	Chalkidiki	Astakos	Serranus scriba	2	13	2.1
2016-09-16	23.944	40.3078	Chalkidiki	Astakos	Serranus scriba	3	13	0.8
2016-09-19	25.8866	38.2154	Chios	Galabakos	Diplodus puntazzo	1	16	1.4
2016-09-19	25.8866	38.2154	Chios	Galabakos	Diplodus puntazzo	1	14	3.8
2016-09-19	25.8866	38.2154	Chios	Galabakos	Diplodus sargus	1	13	0.8
2016-09-19	25.8866	38.2154	Chios	Galabakos	Diplodus sargus	1	12	1.3
2016-09-19	25.8866	38.2154	Chios	Galabakos	Diplodus vulgaris	3	14	1.2
2016-09-19	25.8866	38.2154	Chios	Galabakos	Diplodus vulgaris	2	13	2.3
2016-09-19	25.8866	38.2154	Chios	Galabakos	Diplodus vulgaris	3	15	5.1
2016-09-19	25.8866	38.2154	Chios	Galabakos	Diplodus vulgaris	6	13	2.3
2016-09-19	25.8866	38.2154	Chios	Galabakos	Mullus surmuletus	1	10	3.1
2016-09-19	25.8866	38.2154	Chios	Galabakos	Sparisoma cretense	1	19	5.9
2016-09-19	25.8866	38.2154	Chios	Galabakos	Sarpa salpa	6	15	2.3
2016-09-19	25.8866	38.2154	Chios	Galabakos	Scorpaena notata	1	9	1.8
2016-09-19	25.8866	38.2154	Chios	Galabakos	Serranus scriba	2	14	1.2
2016-09-19	25.8866	38.2154	Chios	Galabakos	Serranus scriba	2	11	2.3
2016-09-19	25.8866	38.2154	Chios	Galabakos	Serranus scriba	1	8	1.2
2016-09-19	25.8866	38.2154	Chios	Galabakos	Siganus luridus	3	19	4.9
2016-09-19	25.8866	38.2154	Chios	Galabakos	Siganus luridus	2	18	1.2
2016-09-19	25.8866	38.2154	Chios	Galabakos	Diplodus sargus	3	15	3.1
2016-09-19	25.8866	38.2154	Chios	Galabakos	Diplodus sargus	1	16	2.4
2016-09-19	25.8866	38.2154	Chios	Galabakos	Diplodus vulgaris	2	14	3.6
2016-09-19	25.8866	38.2154	Chios	Galabakos	Diplodus vulgaris	2	17	6.1
2016-09-19	25.8866	38.2154	Chios	Galabakos	Diplodus vulgaris	1	11	4.2
2016-09-19	25.8866	38.2154	Chios	Galabakos	Diplodus vulgaris	2	13	3.9
2016-09-19	25.8866	38.2154	Chios	Galabakos	Sparisoma cretense	1	16	3.2
2016-09-19	25.8866	38.2154	Chios	Galabakos	Sparisoma cretense	4	12	3.9
2016-09-19	25.8866	38.2154	Chios	Galabakos	Sarpa salpa	2	14	4.1
2016-09-19	25.8866	38.2154	Chios	Galabakos	Serranus scriba	1	10	0.1
2016-09-19	25.8866	38.2154	Chios	Galabakos	Siganus luridus	2	15	1.1
2016-09-19	25.8866	38.2154	Chios	Galabakos	Siganus luridus	3	16	2.3
2016-09-19	25.8866	38.2154	Chios	Galabakos	Siganus luridus	1	16	0.8
2016-09-19	25.8866	38.2154	Chios	Galabakos	Diplodus vulgaris	2	12	1.9
2016-09-19	25.8866	38.2154	Chios	Galabakos	Diplodus vulgaris	1	13	3.8
2016-09-19	25.8866	38.2154	Chios	Galabakos	Sparisoma cretense	3	9	4.2
2016-09-19	25.8866	38.2154	Chios	Galabakos	Sparisoma cretense	1	15	4.2
2016-09-19	25.8866	38.2154	Chios	Galabakos	Sparisoma cretense	2	14	3.6
2016-09-19	25.8866	38.2154	Chios	Galabakos	Sparisoma cretense	1	9	0.4
2016-09-19	25.8866	38.2154	Chios	Galabakos	Sparisoma cretense	2	10	2.4
2016-09-19	25.8866	38.2154	Chios	Galabakos	Sparisoma cretense	1	15	3.1
2016-09-19	25.8866	38.2154	Chios	Galabakos	Sarpa salpa	14	12	3.2
2016-09-19	25.8866	38.2154	Chios	Galabakos	Scorpaena notata	1	5	0.1
2016-09-19	25.8866	38.2154	Chios	Galabakos	Scorpaena porcus	2	9	3.9
2016-09-19	25.8866	38.2154	Chios	Galabakos	Serranus scriba	1	14	3.1
2016-09-19	25.8866	38.2154	Chios	Galabakos	Serranus scriba	2	13	4.1
2016-09-19	25.8866	38.2154	Chios	Galabakos	Serranus scriba	1	15	4.2
2016-09-19	25.8866	38.2154	Chios	Galabakos	Diplodus puntazzo	1	15	4.1
2016-09-19	25.8866	38.2154	Chios	Galabakos	Diplodus sargus	1	15	4.6
2016-09-19	25.8866	38.2154	Chios	Galabakos	Diplodus vulgaris	6	14	1.7
2016-09-19	25.8866	38.2154	Chios	Galabakos	Diplodus vulgaris	2	17	3.9
2016-09-19	25.8866	38.2154	Chios	Galabakos	Diplodus vulgaris	2	13	2.1
2016-09-19	25.8866	38.2154	Chios	Galabakos	Diplodus vulgaris	5	8	0.8
2016-09-19	25.8866	38.2154	Chios	Galabakos	Diplodus vulgaris	4	11	1.3
2016-09-19	25.8866	38.2154	Chios	Galabakos	Diplodus vulgaris	5	10	1.6
2016-09-19	25.8866	38.2154	Chios	Galabakos	Mullus surmuletus	3	13	4.7
2016-09-19	25.8866	38.2154	Chios	Galabakos	Sparisoma cretense	5	13	2.1
2016-09-19	25.8866	38.2154	Chios	Galabakos	Sparisoma cretense	4	9	1.3
2016-09-19	25.8866	38.2154	Chios	Galabakos	Sparisoma cretense	3	12	1.2
2016-09-19	25.8866	38.2154	Chios	Galabakos	Sparisoma cretense	3	19	4.1
2016-09-19	25.8866	38.2154	Chios	Galabakos	Scorpaena notata	1	8	0.3
2016-09-19	25.8866	38.2154	Chios	Galabakos	Serranus scriba	3	11	2.3
2016-09-19	25.8866	38.2154	Chios	Galabakos	Serranus scriba	2	14	6.3
2016-09-19	25.8866	38.2154	Chios	Galabakos	Serranus scriba	1	15	0.4
2016-09-19	25.8866	38.2154	Chios	Galabakos	Siganus luridus	3	18	3.6
2016-09-19	25.8866	38.2154	Chios	Galabakos	Siganus luridus	4	17	1.9
2016-09-19	25.8866	38.2154	Chios	Galabakos	Siganus luridus	4	16	3.9
2016-09-19	25.8866	38.2154	Chios	Galabakos	Diplodus vulgaris	3	10	2.6
2016-09-19	25.8866	38.2154	Chios	Galabakos	Diplodus vulgaris	2	18	5.9
2016-09-19	25.8866	38.2154	Chios	Galabakos	Diplodus vulgaris	1	13	1.2
2016-09-19	25.8866	38.2154	Chios	Galabakos	Diplodus vulgaris	2	12	2.2
2016-09-19	25.8866	38.2154	Chios	Galabakos	Sparisoma cretense	4	11	1.7
2016-09-19	25.8866	38.2154	Chios	Galabakos	Sparisoma cretense	3	19	0.6
2016-09-19	25.8866	38.2154	Chios	Galabakos	Sparisoma cretense	2	12	0.9
2016-09-19	25.8866	38.2154	Chios	Galabakos	Sparisoma cretense	1	17	1.2
2016-09-19	25.8866	38.2154	Chios	Galabakos	Sparisoma cretense	5	11	1.4
2016-09-19	25.8866	38.2154	Chios	Galabakos	Scorpaena notata	1	7	0.1
2016-09-19	25.8866	38.2154	Chios	Galabakos	Serranus scriba	1	16	1.4
2016-09-19	25.8866	38.2154	Chios	Galabakos	Serranus scriba	2	14	4.8
2016-09-19	25.8866	38.2154	Chios	Galabakos	Serranus scriba	2	12	3.2
2016-09-19	25.8866	38.2154	Chios	Galabakos	Serranus scriba	2	12	2.1
2016-09-19	25.8866	38.2154	Chios	Galabakos	Serranus scriba	2	15	3.4
2016-09-19	25.8866	38.2154	Chios	Galabakos	Siganus luridus	2	15	2.1
2016-09-19	25.8866	38.2154	Chios	Galabakos	Siganus luridus	2	17	1.3
2016-09-19	25.8866	38.2154	Chios	Galabakos	Siganus luridus	3	16	2.4
2016-09-19	25.8866	38.2154	Chios	Galabakos	Diplodus sargus	2	14	1.6
2016-09-19	25.8866	38.2154	Chios	Galabakos	Diplodus vulgaris	5	13	2.4
2016-09-19	25.8866	38.2154	Chios	Galabakos	Diplodus vulgaris	8	12	1.6
2016-09-19	25.8866	38.2154	Chios	Galabakos	Diplodus vulgaris	4	15	6.2
2016-09-19	25.8866	38.2154	Chios	Galabakos	Diplodus vulgaris	3	12	3.1
2016-09-19	25.8866	38.2154	Chios	Galabakos	Diplodus vulgaris	3	12	1.7
2016-09-19	25.8866	38.2154	Chios	Galabakos	Oblada melanura	17	14	6.8
2016-09-19	25.8866	38.2154	Chios	Galabakos	Oblada melanura	1	12	0.3
2016-09-19	25.8866	38.2154	Chios	Galabakos	Sparisoma cretense	3	11	1.3
2016-09-19	25.8866	38.2154	Chios	Galabakos	Sparisoma cretense	26	19	1.4
2016-09-19	25.8866	38.2154	Chios	Galabakos	Sparisoma cretense	4	16	4.2
2016-09-19	25.8866	38.2154	Chios	Galabakos	Sparisoma cretense	3	13	1.7
2016-09-19	25.8866	38.2154	Chios	Galabakos	Scorpaena porcus	1	9	1.2
2016-09-19	25.8866	38.2154	Chios	Galabakos	Scorpaena porcus	1	8	0.3
2016-09-19	25.8866	38.2154	Chios	Galabakos	Serranus scriba	2	13	0.3
2016-09-19	25.8866	38.2154	Chios	Galabakos	Serranus scriba	1	12	2.2
2016-09-19	25.8866	38.2154	Chios	Galabakos	Siganus luridus	6	17	2.1
2016-09-19	25.8866	38.2154	Chios	Galabakos	Siganus luridus	3	18	1.4
2016-09-19	25.8632	38.2479	Chios	Pachy nisi	Diplodus sargus	1	14	1.2
2016-09-19	25.8632	38.2479	Chios	Pachy nisi	Diplodus vulgaris	3	12	4.1
2016-09-19	25.8632	38.2479	Chios	Pachy nisi	Oblada melanura	2	9	0.1
2016-09-19	25.8632	38.2479	Chios	Pachy nisi	Sparisoma cretense	5	13	0.8
2016-09-19	25.8632	38.2479	Chios	Pachy nisi	Sparisoma cretense	3	4	0.6
2016-09-19	25.8632	38.2479	Chios	Pachy nisi	Sparisoma cretense	6	12	1.9
2016-09-19	25.8632	38.2479	Chios	Pachy nisi	Sparisoma cretense	2	15	2.6
2016-09-19	25.8632	38.2479	Chios	Pachy nisi	Sparisoma cretense	6	11	0.7
2016-09-19	25.8632	38.2479	Chios	Pachy nisi	Scorpaena notata	1	6	0.1
2016-09-19	25.8632	38.2479	Chios	Pachy nisi	Siganus luridus	2	18	1.2
2016-09-19	25.8632	38.2479	Chios	Pachy nisi	Siganus luridus	1	16	4.1
2016-09-19	25.8632	38.2479	Chios	Pachy nisi	Siganus luridus	1	15	2.5
2016-09-19	25.8632	38.2479	Chios	Pachy nisi	Diplodus sargus	3	16	0.6
2016-09-19	25.8632	38.2479	Chios	Pachy nisi	Diplodus sargus	2	14	2.3
2016-09-19	25.8632	38.2479	Chios	Pachy nisi	Diplodus sargus	3	13	5.1
2016-09-19	25.8632	38.2479	Chios	Pachy nisi	Diplodus vulgaris	9	15	1.3
2016-09-19	25.8632	38.2479	Chios	Pachy nisi	Diplodus vulgaris	9	15	4.3
2016-09-19	25.8632	38.2479	Chios	Pachy nisi	Diplodus vulgaris	8	14	4.2
2016-09-19	25.8632	38.2479	Chios	Pachy nisi	Epinephelus costae	1	27	4.6
2016-09-19	25.8632	38.2479	Chios	Pachy nisi	Epinephelus marginatus	1	31	4.2
2016-09-19	25.8632	38.2479	Chios	Pachy nisi	Oblada melanura	12	13	5.1
2016-09-19	25.8632	38.2479	Chios	Pachy nisi	Oblada melanura	3	9	1.2
2016-09-19	25.8632	38.2479	Chios	Pachy nisi	Oblada melanura	5	10	0.6
2016-09-19	25.8632	38.2479	Chios	Pachy nisi	Oblada melanura	8	12	3.9
2016-09-19	25.8632	38.2479	Chios	Pachy nisi	Sparisoma cretense	4	16	1.3
2016-09-19	25.8632	38.2479	Chios	Pachy nisi	Sparisoma cretense	3	15	3.1
2016-09-19	25.8632	38.2479	Chios	Pachy nisi	Sparisoma cretense	8	10	1.4
2016-09-19	25.8632	38.2479	Chios	Pachy nisi	Sparisoma cretense	4	16	1.2
2016-09-19	25.8632	38.2479	Chios	Pachy nisi	Scorpaena notata	1	8	0.3
2016-09-19	25.8632	38.2479	Chios	Pachy nisi	Serranus scriba	2	13	3.6
2016-09-19	25.8632	38.2479	Chios	Pachy nisi	Siganus luridus	18	19	1.2
2016-09-19	25.8632	38.2479	Chios	Pachy nisi	Siganus luridus	9	11	1.4
2016-09-19	25.8632	38.2479	Chios	Pachy nisi	Siganus luridus	6	17	1.8
2016-09-19	25.8632	38.2479	Chios	Pachy nisi	Siganus luridus	9	15	2.3
2016-09-19	25.8632	38.2479	Chios	Pachy nisi	Diplodus sargus	2	15	4.6
2016-09-19	25.8632	38.2479	Chios	Pachy nisi	Diplodus vulgaris	3	16	5.9
2016-09-19	25.8632	38.2479	Chios	Pachy nisi	Oblada melanura	18	11	3.2
2016-09-19	25.8632	38.2479	Chios	Pachy nisi	Oblada melanura	6	15	4.5
2016-09-19	25.8632	38.2479	Chios	Pachy nisi	Oblada melanura	9	8	1.8
2016-09-19	25.8632	38.2479	Chios	Pachy nisi	Sparisoma cretense	4	15	1.3
2016-09-19	25.8632	38.2479	Chios	Pachy nisi	Sparisoma cretense	3	9	0.6
2016-09-19	25.8632	38.2479	Chios	Pachy nisi	Sparisoma cretense	6	14	1.2
2016-09-19	25.8632	38.2479	Chios	Pachy nisi	Sparisoma cretense	9	7	0.9
2016-09-19	25.8632	38.2479	Chios	Pachy nisi	Sparisoma cretense	8	12	1.4
2016-09-19	25.8632	38.2479	Chios	Pachy nisi	Sparisoma cretense	3	10	1.7
2016-09-19	25.8632	38.2479	Chios	Pachy nisi	Sarpa salpa	11	16	1.9
2016-09-19	25.8632	38.2479	Chios	Pachy nisi	Sarpa salpa	5	12	4.1
2016-09-19	25.8632	38.2479	Chios	Pachy nisi	Sarpa salpa	17	13	1.1
2016-09-19	25.8632	38.2479	Chios	Pachy nisi	Sarpa salpa	5	12	2.4
2016-09-19	25.8632	38.2479	Chios	Pachy nisi	Siganus luridus	6	18	1.7
2016-09-19	25.8632	38.2479	Chios	Pachy nisi	Diplodus puntazzo	3	17	2.4
2016-09-19	25.8632	38.2479	Chios	Pachy nisi	Diplodus puntazzo	2	16	1.9
2016-09-19	25.8632	38.2479	Chios	Pachy nisi	Diplodus sargus	2	18	1.9
2016-09-19	25.8632	38.2479	Chios	Pachy nisi	Diplodus sargus	2	15	3.1
2016-09-19	25.8632	38.2479	Chios	Pachy nisi	Diplodus vulgaris	16	17	1.5
2016-09-19	25.8632	38.2479	Chios	Pachy nisi	Diplodus vulgaris	14	15	2.3
2016-09-19	25.8632	38.2479	Chios	Pachy nisi	Diplodus vulgaris	15	16	3.1
2016-09-19	25.8632	38.2479	Chios	Pachy nisi	Diplodus vulgaris	40	17	2.4
2016-09-19	25.8632	38.2479	Chios	Pachy nisi	Diplodus vulgaris	18	21	0.3
2016-09-19	25.8632	38.2479	Chios	Pachy nisi	Diplodus vulgaris	9	11	1.7
2016-09-19	25.8632	38.2479	Chios	Pachy nisi	Mullus surmuletus	7	13	0.6
2016-09-19	25.8632	38.2479	Chios	Pachy nisi	Sparisoma cretense	3	21	1.3
2016-09-19	25.8632	38.2479	Chios	Pachy nisi	Sparisoma cretense	2	15	0.6
2016-09-19	25.8632	38.2479	Chios	Pachy nisi	Sparisoma cretense	4	8	1.5
2016-09-19	25.8632	38.2479	Chios	Pachy nisi	Sparisoma cretense	3	9	0.8
2016-09-19	25.8632	38.2479	Chios	Pachy nisi	Sarpa salpa	12	19	0.7
2016-09-19	25.8632	38.2479	Chios	Pachy nisi	Scorpaena notata	1	5	0.1
2016-09-19	25.8632	38.2479	Chios	Pachy nisi	Scorpaena porcus	1	9	0.1
2016-09-19	25.8632	38.2479	Chios	Pachy nisi	Scorpaena porcus	1	11	0.7
2016-09-19	25.8632	38.2479	Chios	Pachy nisi	Scorpaena porcus	1	7	0.1
2016-09-19	25.8632	38.2479	Chios	Pachy nisi	Serranus scriba	1	19	0.1
2016-09-19	25.8632	38.2479	Chios	Pachy nisi	Serranus scriba	2	13	1.4
2016-09-19	25.8632	38.2479	Chios	Pachy nisi	Serranus scriba	2	14	2.5
2016-09-19	25.8632	38.2479	Chios	Pachy nisi	Siganus luridus	2	18	9.5
2016-09-19	25.8632	38.2479	Chios	Pachy nisi	Siganus luridus	3	16	3.1
2016-09-19	25.8632	38.2479	Chios	Pachy nisi	Siganus luridus	2	15	0.4
2016-09-19	25.8632	38.2479	Chios	Pachy nisi	Diplodus puntazzo	2	17	2.5
2016-09-19	25.8632	38.2479	Chios	Pachy nisi	Diplodus sargus	5	19	4.4
2016-09-19	25.8632	38.2479	Chios	Pachy nisi	Diplodus vulgaris	28	17	1.4
2016-09-19	25.8632	38.2479	Chios	Pachy nisi	Diplodus vulgaris	9	12	2.3
2016-09-19	25.8632	38.2479	Chios	Pachy nisi	Diplodus vulgaris	5	19	1.2
2016-09-19	25.8632	38.2479	Chios	Pachy nisi	Diplodus vulgaris	4	21	0.8
2016-09-19	25.8632	38.2479	Chios	Pachy nisi	Dentex dentex	2	28	7.3
2016-09-19	25.8632	38.2479	Chios	Pachy nisi	Epinephelus costae	1	23	4.2
2016-09-19	25.8632	38.2479	Chios	Pachy nisi	Epinephelus marginatus	1	54	3.1
2016-09-19	25.8632	38.2479	Chios	Pachy nisi	Mullus surmuletus	5	12	1.3
2016-09-19	25.8632	38.2479	Chios	Pachy nisi	Sparisoma cretense	4	9	2.1
2016-09-19	25.8632	38.2479	Chios	Pachy nisi	Sparisoma cretense	3	11	3.1
2016-09-19	25.8632	38.2479	Chios	Pachy nisi	Sarpa salpa	4	16	2.7
2016-09-19	25.8632	38.2479	Chios	Pachy nisi	Sarpa salpa	5	17	1.4
2016-09-19	25.8632	38.2479	Chios	Pachy nisi	Scorpaena notata	1	10	0.2
2016-09-19	25.8632	38.2479	Chios	Pachy nisi	Serranus scriba	2	13	0.3
2016-09-19	25.8632	38.2479	Chios	Pachy nisi	Serranus scriba	3	14	1.1
2016-09-19	25.8632	38.2479	Chios	Pachy nisi	Serranus scriba	4	11	0.7
2016-09-19	25.8632	38.2479	Chios	Pachy nisi	Siganus luridus	4	16	3.1
2016-09-19	25.8632	38.2479	Chios	Pachy nisi	Siganus luridus	3	17	0.9
2016-09-19	25.8632	38.2479	Chios	Pachy nisi	Diplodus puntazzo	1	15	2.8
2016-09-19	25.8632	38.2479	Chios	Pachy nisi	Diplodus sargus	2	14	4.5
2016-09-19	25.8632	38.2479	Chios	Pachy nisi	Diplodus sargus	2	11	2.9
2016-09-19	25.8632	38.2479	Chios	Pachy nisi	Diplodus sargus	3	15	2.2
2016-09-19	25.8632	38.2479	Chios	Pachy nisi	Diplodus vulgaris	7	15	2.3
2016-09-19	25.8632	38.2479	Chios	Pachy nisi	Diplodus vulgaris	3	14	5.6
2016-09-19	25.8632	38.2479	Chios	Pachy nisi	Diplodus vulgaris	12	15	3.9
2016-09-19	25.8632	38.2479	Chios	Pachy nisi	Diplodus vulgaris	4	13	2.1
2016-09-19	25.8632	38.2479	Chios	Pachy nisi	Diplodus vulgaris	17	15	3.1
2016-09-19	25.8632	38.2479	Chios	Pachy nisi	Epinephelus costae	1	25	3.2
2016-09-19	25.8632	38.2479	Chios	Pachy nisi	Epinephelus costae	2	27	3.4
2016-09-19	25.8632	38.2479	Chios	Pachy nisi	Mullus surmuletus	1	12	2.3
2016-09-19	25.8632	38.2479	Chios	Pachy nisi	Oblada melanura	3	16	5.1
2016-09-19	25.8632	38.2479	Chios	Pachy nisi	Sparisoma cretense	3	14	4.3
2016-09-19	25.8632	38.2479	Chios	Pachy nisi	Sparisoma cretense	2	18	3.1
2016-09-19	25.8632	38.2479	Chios	Pachy nisi	Sparisoma cretense	2	9	1.6
2016-09-19	25.8632	38.2479	Chios	Pachy nisi	Sparisoma cretense	3	16	1.9
2016-09-19	25.8632	38.2479	Chios	Pachy nisi	Sarpa salpa	24	16	4.3
2016-09-19	25.8632	38.2479	Chios	Pachy nisi	Serranus scriba	3	14	3.9
2016-09-19	25.8632	38.2479	Chios	Pachy nisi	Serranus scriba	2	11	0.3
2016-09-19	25.8632	38.2479	Chios	Pachy nisi	Serranus scriba	2	13	1.5
2016-09-19	25.8632	38.2479	Chios	Pachy nisi	Serranus scriba	3	19	2.4
2016-09-19	25.8632	38.2479	Chios	Pachy nisi	Siganus luridus	1	18	5.3
2016-09-19	25.8632	38.2479	Chios	Pachy nisi	Siganus luridus	2	16	4.9
2016-09-20	26.1456	38.4443	Chios	Glaroi	Diplodus annularis	3	11	3.1
2016-09-20	26.1456	38.4443	Chios	Glaroi	Diplodus annularis	2	13	1.1
2016-09-20	26.1456	38.4443	Chios	Glaroi	Diplodus annularis	2	9	2.1
2016-09-20	26.1456	38.4443	Chios	Glaroi	Diplodus annularis	1	6	1.1
2016-09-20	26.1456	38.4443	Chios	Glaroi	Diplodus annularis	2	11	1.2
2016-09-20	26.1456	38.4443	Chios	Glaroi	Diplodus annularis	3	12	1.7
2016-09-20	26.1456	38.4443	Chios	Glaroi	Diplodus puntazzo	2	14	3.1
2016-09-20	26.1456	38.4443	Chios	Glaroi	Diplodus puntazzo	1	10	1.4
2016-09-20	26.1456	38.4443	Chios	Glaroi	Diplodus puntazzo	1	12	3
2016-09-20	26.1456	38.4443	Chios	Glaroi	Diplodus puntazzo	1	13	2.8
2016-09-20	26.1456	38.4443	Chios	Glaroi	Diplodus sargus	1	8	0.6
2016-09-20	26.1456	38.4443	Chios	Glaroi	Diplodus sargus	1	9	1.1
2016-09-20	26.1456	38.4443	Chios	Glaroi	Diplodus sargus	2	10	0.5
2016-09-20	26.1456	38.4443	Chios	Glaroi	Diplodus sargus	2	12	0.6
2016-09-20	26.1456	38.4443	Chios	Glaroi	Diplodus sargus	4	10	1.1
2016-09-20	26.1456	38.4443	Chios	Glaroi	Diplodus sargus	3	14	2.6
2016-09-20	26.1456	38.4443	Chios	Glaroi	Diplodus sargus	4	9	0.3
2016-09-20	26.1456	38.4443	Chios	Glaroi	Diplodus vulgaris	4	10	1.1
2016-09-20	26.1456	38.4443	Chios	Glaroi	Diplodus vulgaris	2	12	1.5
2016-09-20	26.1456	38.4443	Chios	Glaroi	Diplodus vulgaris	3	10	1.8
2016-09-20	26.1456	38.4443	Chios	Glaroi	Diplodus vulgaris	2	13	3.2
2016-09-20	26.1456	38.4443	Chios	Glaroi	Diplodus vulgaris	3	12	1.3
2016-09-20	26.1456	38.4443	Chios	Glaroi	Diplodus vulgaris	2	9	0.4
2016-09-20	26.1456	38.4443	Chios	Glaroi	Diplodus vulgaris	1	9	1.6
2016-09-20	26.1456	38.4443	Chios	Glaroi	Diplodus vulgaris	2	15	3.1
2016-09-20	26.1456	38.4443	Chios	Glaroi	Diplodus vulgaris	3	10	1.2
2016-09-20	26.1456	38.4443	Chios	Glaroi	Diplodus vulgaris	7	14	3.5
2016-09-20	26.1456	38.4443	Chios	Glaroi	Diplodus vulgaris	4	13	2.3
2016-09-20	26.1456	38.4443	Chios	Glaroi	Oblada melanura	9	7	0.9
2016-09-20	26.1456	38.4443	Chios	Glaroi	Oblada melanura	1	14	1.3
2016-09-20	26.1456	38.4443	Chios	Glaroi	Sarpa salpa	80	8	0.2
2016-09-20	26.1456	38.4443	Chios	Glaroi	Sarpa salpa	12	15	1.8
2016-09-20	26.1456	38.4443	Chios	Glaroi	Scorpaena porcus	1	11	0.3
2016-09-20	26.1456	38.4443	Chios	Glaroi	Serranus scriba	2	13	4.7
2016-09-20	26.1456	38.4443	Chios	Glaroi	Serranus scriba	1	12	1.3
2016-09-20	26.1456	38.4443	Chios	Glaroi	Serranus scriba	1	14	1.2
2016-09-20	26.1456	38.4443	Chios	Glaroi	Serranus scriba	1	13	0.7
2016-09-20	26.1456	38.4443	Chios	Glaroi	Serranus scriba	1	15	1.3
2016-09-20	26.1456	38.4443	Chios	Glaroi	Diplodus annularis	1	16	2.4
2016-09-20	26.1456	38.4443	Chios	Glaroi	Diplodus annularis	1	13	1.2
2016-09-20	26.1456	38.4443	Chios	Glaroi	Diplodus annularis	3	14	2.4
2016-09-20	26.1456	38.4443	Chios	Glaroi	Diplodus annularis	1	10	2.3
2016-09-20	26.1456	38.4443	Chios	Glaroi	Diplodus annularis	4	13	2.1
2016-09-20	26.1456	38.4443	Chios	Glaroi	Diplodus puntazzo	2	16	1.5
2016-09-20	26.1456	38.4443	Chios	Glaroi	Diplodus puntazzo	3	14	2.1
2016-09-20	26.1456	38.4443	Chios	Glaroi	Diplodus puntazzo	1	17	2.4
2016-09-20	26.1456	38.4443	Chios	Glaroi	Diplodus sargus	4	13	1.9
2016-09-20	26.1456	38.4443	Chios	Glaroi	Diplodus sargus	6	10	1.1
2016-09-20	26.1456	38.4443	Chios	Glaroi	Diplodus sargus	3	11	3.5
2016-09-20	26.1456	38.4443	Chios	Glaroi	Diplodus sargus	5	15	1.8
2016-09-20	26.1456	38.4443	Chios	Glaroi	Diplodus sargus	3	15	1.9
2016-09-20	26.1456	38.4443	Chios	Glaroi	Diplodus sargus	4	14	2.1
2016-09-20	26.1456	38.4443	Chios	Glaroi	Diplodus sargus	2	14	1.1
2016-09-20	26.1456	38.4443	Chios	Glaroi	Diplodus sargus	3	16	1.3
2016-09-20	26.1456	38.4443	Chios	Glaroi	Diplodus sargus	2	17	1.7
2016-09-20	26.1456	38.4443	Chios	Glaroi	Diplodus vulgaris	5	11	0.8
2016-09-20	26.1456	38.4443	Chios	Glaroi	Diplodus vulgaris	3	14	1.1
2016-09-20	26.1456	38.4443	Chios	Glaroi	Diplodus vulgaris	3	10	1.5
2016-09-20	26.1456	38.4443	Chios	Glaroi	Diplodus vulgaris	2	13	1.5
2016-09-20	26.1456	38.4443	Chios	Glaroi	Diplodus vulgaris	5	12	2.9
2016-09-20	26.1456	38.4443	Chios	Glaroi	Diplodus vulgaris	6	14	1.7
2016-09-20	26.1456	38.4443	Chios	Glaroi	Diplodus vulgaris	5	14	1.9
2016-09-20	26.1456	38.4443	Chios	Glaroi	Diplodus vulgaris	4	13	1.7
2016-09-20	26.1456	38.4443	Chios	Glaroi	Oblada melanura	10	9	0.4
2016-09-20	26.1456	38.4443	Chios	Glaroi	Oblada melanura	4	15	1.9
2016-09-20	26.1456	38.4443	Chios	Glaroi	Serranus scriba	2	14	1.1
2016-09-20	26.1456	38.4443	Chios	Glaroi	Diplodus annularis	4	12	1.5
2016-09-20	26.1456	38.4443	Chios	Glaroi	Diplodus annularis	9	13	2.6
2016-09-20	26.1456	38.4443	Chios	Glaroi	Diplodus annularis	2	15	1.3
2016-09-20	26.1456	38.4443	Chios	Glaroi	Diplodus annularis	3	10	1.1
2016-09-20	26.1456	38.4443	Chios	Glaroi	Diplodus annularis	5	11	1.7
2016-09-20	26.1456	38.4443	Chios	Glaroi	Diplodus annularis	2	14	0.6
2016-09-20	26.1456	38.4443	Chios	Glaroi	Diplodus annularis	3	10	1.5
2016-09-20	26.1456	38.4443	Chios	Glaroi	Diplodus annularis	5	13	1.1
2016-09-20	26.1456	38.4443	Chios	Glaroi	Diplodus annularis	4	12	0.8
2016-09-20	26.1456	38.4443	Chios	Glaroi	Diplodus sargus	10	14	2.3
2016-09-20	26.1456	38.4443	Chios	Glaroi	Diplodus sargus	5	12	1.4
2016-09-20	26.1456	38.4443	Chios	Glaroi	Diplodus sargus	3	14	2.7
2016-09-20	26.1456	38.4443	Chios	Glaroi	Diplodus sargus	5	10	1.5
2016-09-20	26.1456	38.4443	Chios	Glaroi	Diplodus sargus	9	15	2.1
2016-09-20	26.1456	38.4443	Chios	Glaroi	Diplodus sargus	7	14	0.4
2016-09-20	26.1456	38.4443	Chios	Glaroi	Diplodus sargus	5	10	1.1
2016-09-20	26.1456	38.4443	Chios	Glaroi	Diplodus vulgaris	6	14	2.1
2016-09-20	26.1456	38.4443	Chios	Glaroi	Diplodus vulgaris	5	10	1.9
2016-09-20	26.1456	38.4443	Chios	Glaroi	Diplodus vulgaris	5	14	2.3
2016-09-20	26.1456	38.4443	Chios	Glaroi	Diplodus vulgaris	8	10	1.9
2016-09-20	26.1456	38.4443	Chios	Glaroi	Diplodus vulgaris	4	15	2.1
2016-09-20	26.1456	38.4443	Chios	Glaroi	Diplodus vulgaris	15	16	0.3
2016-09-20	26.1456	38.4443	Chios	Glaroi	Diplodus vulgaris	9	10	1.3
2016-09-20	26.1456	38.4443	Chios	Glaroi	Oblada melanura	9	9	0.1
2016-09-20	26.1456	38.4443	Chios	Glaroi	Oblada melanura	5	16	1.9
2016-09-20	26.1456	38.4443	Chios	Glaroi	Sparisoma cretense	1	18	2.2
2016-09-20	26.1456	38.4443	Chios	Glaroi	Sarpa salpa	13	12	1.4
2016-09-20	26.1456	38.4443	Chios	Glaroi	Sarpa salpa	35	16	0.3
2016-09-20	26.1456	38.4443	Chios	Glaroi	Sarpa salpa	21	18	4.5
2016-09-20	26.1456	38.4443	Chios	Glaroi	Scorpaena porcus	1	14	2.3
2016-09-20	26.1456	38.4443	Chios	Glaroi	Serranus scriba	1	13	0.2
2016-09-20	26.1456	38.4443	Chios	Glaroi	Serranus scriba	2	14	0.4
2016-09-20	26.1456	38.4443	Chios	Glaroi	Diplodus annularis	1	13	1.2
2016-09-20	26.1456	38.4443	Chios	Glaroi	Diplodus puntazzo	1	16	1.3
2016-09-20	26.1456	38.4443	Chios	Glaroi	Diplodus puntazzo	2	12	0.9
2016-09-20	26.1456	38.4443	Chios	Glaroi	Diplodus puntazzo	2	15	1.9
2016-09-20	26.1456	38.4443	Chios	Glaroi	Diplodus sargus	3	15	1.7
2016-09-20	26.1456	38.4443	Chios	Glaroi	Diplodus sargus	3	13	2.1
2016-09-20	26.1456	38.4443	Chios	Glaroi	Diplodus sargus	2	11	1.4
2016-09-20	26.1456	38.4443	Chios	Glaroi	Diplodus sargus	5	14	3.7
2016-09-20	26.1456	38.4443	Chios	Glaroi	Diplodus sargus	3	8	2.3
2016-09-20	26.1456	38.4443	Chios	Glaroi	Diplodus vulgaris	2	11	0.8
2016-09-20	26.1456	38.4443	Chios	Glaroi	Diplodus vulgaris	1	15	0.9
2016-09-20	26.1456	38.4443	Chios	Glaroi	Diplodus vulgaris	7	13	1.4
2016-09-20	26.1456	38.4443	Chios	Glaroi	Diplodus vulgaris	3	9	1.3
2016-09-20	26.1456	38.4443	Chios	Glaroi	Diplodus vulgaris	11	13	5.2
2016-09-20	26.1456	38.4443	Chios	Glaroi	Diplodus vulgaris	5	9	0.5
2016-09-20	26.1456	38.4443	Chios	Glaroi	Diplodus vulgaris	2	14	1.9
2016-09-20	26.1456	38.4443	Chios	Glaroi	Mullus surmuletus	1	14	1.6
2016-09-20	26.1456	38.4443	Chios	Glaroi	Oblada melanura	2	9	2.6
2016-09-20	26.1456	38.4443	Chios	Glaroi	Sparisoma cretense	5	18	1.2
2016-09-20	26.1456	38.4443	Chios	Glaroi	Serranus scriba	1	9	0.2
2016-09-20	26.1456	38.4443	Chios	Glaroi	Serranus scriba	2	13	0.89
2016-09-20	26.1456	38.4443	Chios	Glaroi	Serranus scriba	1	14	1.3
2016-09-20	26.1456	38.4443	Chios	Glaroi	Serranus scriba	1	18	0.3
2016-09-20	26.1456	38.4443	Chios	Glaroi	Serranus scriba	1	10	0.2
2016-09-20	26.1456	38.4443	Chios	Glaroi	Diplodus annularis	2	12	3.1
2016-09-20	26.1456	38.4443	Chios	Glaroi	Diplodus annularis	1	13	1.1
2016-09-20	26.1456	38.4443	Chios	Glaroi	Diplodus annularis	2	14	1.4
2016-09-20	26.1456	38.4443	Chios	Glaroi	Diplodus annularis	2	9	1.2
2016-09-20	26.1456	38.4443	Chios	Glaroi	Diplodus sargus	3	17	2.9
2016-09-20	26.1456	38.4443	Chios	Glaroi	Diplodus sargus	2	13	1.2
2016-09-20	26.1456	38.4443	Chios	Glaroi	Diplodus sargus	1	15	0.8
2016-09-20	26.1456	38.4443	Chios	Glaroi	Diplodus sargus	1	11	1.3
2016-09-20	26.1456	38.4443	Chios	Glaroi	Diplodus vulgaris	19	16	1.7
2016-09-20	26.1456	38.4443	Chios	Glaroi	Diplodus vulgaris	2	17	1.3
2016-09-20	26.1456	38.4443	Chios	Glaroi	Diplodus vulgaris	2	14	1.1
2016-09-20	26.1456	38.4443	Chios	Glaroi	Diplodus vulgaris	3	13	2.1
2016-09-20	26.1456	38.4443	Chios	Glaroi	Diplodus vulgaris	2	8	0.9
2016-09-20	26.1456	38.4443	Chios	Glaroi	Oblada melanura	3	12	5.1
2016-09-20	26.1456	38.4443	Chios	Glaroi	Sparisoma cretense	3	9	1.2
2016-09-20	26.1456	38.4443	Chios	Glaroi	Sparisoma cretense	2	14	1.7
2016-09-20	26.1456	38.4443	Chios	Glaroi	Sarpa salpa	26	13	1.4
2016-09-20	26.1456	38.4443	Chios	Glaroi	Scorpaena porcus	1	13	0.4
2016-09-20	26.1456	38.4443	Chios	Glaroi	Serranus scriba	2	12	1.6
2016-09-20	26.1456	38.4443	Chios	Glaroi	Serranus scriba	2	15	0.6
2016-09-20	26.1456	38.4443	Chios	Glaroi	Serranus scriba	1	14	3
2016-09-20	26.1456	38.4443	Chios	Glaroi	Serranus scriba	1	11	0.7
2016-09-20	26.1456	38.4443	Chios	Glaroi	Diplodus annularis	2	13	1.3
2016-09-20	26.1456	38.4443	Chios	Glaroi	Diplodus annularis	1	10	2.3
2016-09-20	26.1456	38.4443	Chios	Glaroi	Diplodus annularis	1	12	0.8
2016-09-20	26.1456	38.4443	Chios	Glaroi	Diplodus puntazzo	1	14	1.7
2016-09-20	26.1456	38.4443	Chios	Glaroi	Diplodus puntazzo	1	11	2.1
2016-09-20	26.1456	38.4443	Chios	Glaroi	Diplodus sargus	2	14	1.9
2016-09-20	26.1456	38.4443	Chios	Glaroi	Diplodus sargus	1	16	2.3
2016-09-20	26.1456	38.4443	Chios	Glaroi	Diplodus sargus	1	15	1.9
2016-09-20	26.1456	38.4443	Chios	Glaroi	Diplodus vulgaris	5	12	0.8
2016-09-20	26.1456	38.4443	Chios	Glaroi	Diplodus vulgaris	13	15	3.1
2016-09-20	26.1456	38.4443	Chios	Glaroi	Diplodus vulgaris	2	14	1.5
2016-09-20	26.1456	38.4443	Chios	Glaroi	Diplodus vulgaris	5	12	0.6
2016-09-20	26.1456	38.4443	Chios	Glaroi	Diplodus vulgaris	3	12	1.7
2016-09-20	26.1456	38.4443	Chios	Glaroi	Diplodus vulgaris	2	14	3.1
2016-09-20	26.1456	38.4443	Chios	Glaroi	Oblada melanura	1	7	1.2
2016-09-20	26.1456	38.4443	Chios	Glaroi	Oblada melanura	2	8	3.2
2016-09-20	26.1456	38.4443	Chios	Glaroi	Sarpa salpa	13	15	1.9
2016-09-20	26.1456	38.4443	Chios	Glaroi	Sarpa salpa	4	18	3.1
2016-09-20	26.1456	38.4443	Chios	Glaroi	Serranus scriba	1	12	0.8
2016-09-20	26.1456	38.4443	Chios	Glaroi	Serranus scriba	2	14	0.5
2016-09-20	26.1456	38.4443	Chios	Glaroi	Serranus scriba	1	13	0.2
2016-09-20	26.1456	38.4443	Chios	Glaroi	Serranus scriba	1	12	1.6
2016-09-20	25.9404	38.3196	Chios	Pelagonisos	Diplodus puntazzo	2	16	2.1
2016-09-20	25.9404	38.3196	Chios	Pelagonisos	Diplodus puntazzo	2	15	3.2
2016-09-20	25.9404	38.3196	Chios	Pelagonisos	Diplodus sargus	3	14	1.7
2016-09-20	25.9404	38.3196	Chios	Pelagonisos	Diplodus sargus	4	15	2.6
2016-09-20	25.9404	38.3196	Chios	Pelagonisos	Diplodus vulgaris	8	14	1.3
2016-09-20	25.9404	38.3196	Chios	Pelagonisos	Diplodus vulgaris	3	12	3.1
2016-09-20	25.9404	38.3196	Chios	Pelagonisos	Oblada melanura	6	11	1.1
2016-09-20	25.9404	38.3196	Chios	Pelagonisos	Oblada melanura	13	7	0.6
2016-09-20	25.9404	38.3196	Chios	Pelagonisos	Sarpa salpa	23	14	2.1
2016-09-20	25.9404	38.3196	Chios	Pelagonisos	Sarpa salpa	15	9	1.4
2016-09-20	25.9404	38.3196	Chios	Pelagonisos	Sarpa salpa	17	14	0.2
2016-09-20	25.9404	38.3196	Chios	Pelagonisos	Serranus scriba	2	15	2.3
2016-09-20	25.9404	38.3196	Chios	Pelagonisos	Serranus scriba	2	16	1.4
2016-09-20	25.9404	38.3196	Chios	Pelagonisos	Siganus luridus	21	18	2.4
2016-09-20	25.9404	38.3196	Chios	Pelagonisos	Diplodus annularis	1	10	3.2
2016-09-20	25.9404	38.3196	Chios	Pelagonisos	Diplodus sargus	1	13	3.1
2016-09-20	25.9404	38.3196	Chios	Pelagonisos	Diplodus vulgaris	2	14	2.9
2016-09-20	25.9404	38.3196	Chios	Pelagonisos	Diplodus vulgaris	1	15	4.9
2016-09-20	25.9404	38.3196	Chios	Pelagonisos	Oblada melanura	3	12	1.6
2016-09-20	25.9404	38.3196	Chios	Pelagonisos	Oblada melanura	2	11	3.4
2016-09-20	25.9404	38.3196	Chios	Pelagonisos	Sparisoma cretense	1	9	5.1
2016-09-20	25.9404	38.3196	Chios	Pelagonisos	Sparisoma cretense	1	14	4.7
2016-09-20	25.9404	38.3196	Chios	Pelagonisos	Sarpa salpa	18	14	0.2
2016-09-20	25.9404	38.3196	Chios	Pelagonisos	Sarpa salpa	14	12	5.1
2016-09-20	25.9404	38.3196	Chios	Pelagonisos	Sarpa salpa	64	10	1.8
2016-09-20	25.9404	38.3196	Chios	Pelagonisos	Siganus luridus	4	19	1.7
2016-09-20	25.9404	38.3196	Chios	Pelagonisos	Siganus luridus	1	18	5.4
2016-09-20	25.9404	38.3196	Chios	Pelagonisos	Diplodus annularis	2	13	3.6
2016-09-20	25.9404	38.3196	Chios	Pelagonisos	Diplodus puntazzo	1	14	1.3
2016-09-20	25.9404	38.3196	Chios	Pelagonisos	Diplodus puntazzo	2	15	0.8
2016-09-20	25.9404	38.3196	Chios	Pelagonisos	Diplodus puntazzo	1	15	1.4
2016-09-20	25.9404	38.3196	Chios	Pelagonisos	Diplodus sargus	2	15	1.3
2016-09-20	25.9404	38.3196	Chios	Pelagonisos	Diplodus sargus	2	14	1.2
2016-09-20	25.9404	38.3196	Chios	Pelagonisos	Diplodus sargus	3	13	1.2
2016-09-20	25.9404	38.3196	Chios	Pelagonisos	Diplodus sargus	3	14	4.8
2016-09-20	25.9404	38.3196	Chios	Pelagonisos	Diplodus vulgaris	2	13	0.8
2016-09-20	25.9404	38.3196	Chios	Pelagonisos	Diplodus vulgaris	2	15	0.4
2016-09-20	25.9404	38.3196	Chios	Pelagonisos	Diplodus vulgaris	2	11	1.4
2016-09-20	25.9404	38.3196	Chios	Pelagonisos	Diplodus vulgaris	2	14	5.1
2016-09-20	25.9404	38.3196	Chios	Pelagonisos	Oblada melanura	5	9	0.8
2016-09-20	25.9404	38.3196	Chios	Pelagonisos	Sparisoma cretense	2	12	3.2
2016-09-20	25.9404	38.3196	Chios	Pelagonisos	Sparisoma cretense	1	15	1.2
2016-09-20	25.9404	38.3196	Chios	Pelagonisos	Sparisoma cretense	2	14	3.1
2016-09-20	25.9404	38.3196	Chios	Pelagonisos	Sarpa salpa	2	17	3.5
2016-09-20	25.9404	38.3196	Chios	Pelagonisos	Sarpa salpa	9	16	2.1
2016-09-20	25.9404	38.3196	Chios	Pelagonisos	Siganus luridus	6	21	2.4
2016-09-20	25.9404	38.3196	Chios	Pelagonisos	Siganus luridus	3	15	3
2016-09-20	25.9404	38.3196	Chios	Pelagonisos	Siganus luridus	2	16	2.7
2016-09-20	25.9404	38.3196	Chios	Pelagonisos	Siganus luridus	3	15	3.4
2016-09-20	25.9404	38.3196	Chios	Pelagonisos	Siganus luridus	4	18	1.1
2016-09-20	25.9404	38.3196	Chios	Pelagonisos	Diplodus annularis	2	12	0.6
2016-09-20	25.9404	38.3196	Chios	Pelagonisos	Diplodus sargus	1	15	5.4
2016-09-20	25.9404	38.3196	Chios	Pelagonisos	Diplodus vulgaris	3	15	4.1
2016-09-20	25.9404	38.3196	Chios	Pelagonisos	Diplodus vulgaris	3	14	5.2
2016-09-20	25.9404	38.3196	Chios	Pelagonisos	Diplodus vulgaris	8	16	3.7
2016-09-20	25.9404	38.3196	Chios	Pelagonisos	Diplodus vulgaris	3	12	0.9
2016-09-20	25.9404	38.3196	Chios	Pelagonisos	Sarpa salpa	57	16	1.2
2016-09-20	25.9404	38.3196	Chios	Pelagonisos	Scorpaena porcus	1	10	1.1
2016-09-20	25.9404	38.3196	Chios	Pelagonisos	Serranus scriba	2	13	1.2
2016-09-20	25.9404	38.3196	Chios	Pelagonisos	Spondiliosoma cantharus	1	11	0.7
2016-09-20	25.9404	38.3196	Chios	Pelagonisos	Spondiliosoma cantharus	1	16	1.9
2016-09-20	25.9404	38.3196	Chios	Pelagonisos	Diplodus annularis	3	10	5.7
2016-09-20	25.9404	38.3196	Chios	Pelagonisos	Diplodus annularis	1	12	0.6
2016-09-20	25.9404	38.3196	Chios	Pelagonisos	Diplodus annularis	3	11	2.4
2016-09-20	25.9404	38.3196	Chios	Pelagonisos	Mullus surmuletus	1	13	1.2
2016-09-20	25.9404	38.3196	Chios	Pelagonisos	Sparisoma cretense	1	18	6.3
2016-09-20	25.9404	38.3196	Chios	Pelagonisos	Scorpaena notata	1	8	0.3
2016-09-20	25.9404	38.3196	Chios	Pelagonisos	Serranus cabrilla	1	11	0.6
2016-09-20	25.9404	38.3196	Chios	Pelagonisos	Serranus scriba	1	14	0.9
2016-09-20	25.9404	38.3196	Chios	Pelagonisos	Serranus scriba	1	15	1.6
2016-09-20	25.9404	38.3196	Chios	Pelagonisos	Diplodus annularis	3	10	0.8
2016-09-20	25.9404	38.3196	Chios	Pelagonisos	Diplodus annularis	2	8	3.1
2016-09-20	25.9404	38.3196	Chios	Pelagonisos	Diplodus annularis	2	12	1.6
2016-09-20	25.9404	38.3196	Chios	Pelagonisos	Diplodus vulgaris	4	13	5.4
2016-09-20	25.9404	38.3196	Chios	Pelagonisos	Diplodus vulgaris	23	14	3.5
2016-09-20	25.9404	38.3196	Chios	Pelagonisos	Diplodus vulgaris	12	15	1.4
2016-09-20	25.9404	38.3196	Chios	Pelagonisos	Mullus surmuletus	4	12	1.1
2016-09-20	25.9404	38.3196	Chios	Pelagonisos	Mullus surmuletus	1	16	1.5
2016-09-20	25.9404	38.3196	Chios	Pelagonisos	Sparisoma cretense	1	16	3.5
2016-09-20	25.9404	38.3196	Chios	Pelagonisos	Sparisoma cretense	2	12	3.5
2016-09-20	25.9404	38.3196	Chios	Pelagonisos	Scorpaena notata	1	7	0.1
2016-09-20	25.9404	38.3196	Chios	Pelagonisos	Scorpaena porcus	1	9	1.6
2016-09-20	25.9404	38.3196	Chios	Pelagonisos	Serranus cabrilla	1	13	0.8
2016-09-20	25.9404	38.3196	Chios	Pelagonisos	Serranus scriba	1	15	0.7
2016-09-21	26.3417	39.3908	Lesvos	Korakas	Diplodus annularis	2	13	1.8
2016-09-21	26.3417	39.3908	Lesvos	Korakas	Diplodus sargus	6	12	2.4
2016-09-21	26.3417	39.3908	Lesvos	Korakas	Diplodus sargus	3	14	2.1
2016-09-21	26.3417	39.3908	Lesvos	Korakas	Diplodus sargus	2	10	2.3
2016-09-21	26.3417	39.3908	Lesvos	Korakas	Diplodus sargus	3	15	2.9
2016-09-21	26.3417	39.3908	Lesvos	Korakas	Diplodus sargus	4	14	5.9
2016-09-21	26.3417	39.3908	Lesvos	Korakas	Diplodus sargus	3	13	2.2
2016-09-21	26.3417	39.3908	Lesvos	Korakas	Diplodus sargus	19	16	3.2
2016-09-21	26.3417	39.3908	Lesvos	Korakas	Diplodus sargus	2	15	1.3
2016-09-21	26.3417	39.3908	Lesvos	Korakas	Diplodus sargus	5	14	2.6
2016-09-21	26.3417	39.3908	Lesvos	Korakas	Diplodus vulgaris	2	12	1.6
2016-09-21	26.3417	39.3908	Lesvos	Korakas	Diplodus vulgaris	3	9	0.1
2016-09-21	26.3417	39.3908	Lesvos	Korakas	Diplodus vulgaris	3	15	4.7
2016-09-21	26.3417	39.3908	Lesvos	Korakas	Diplodus vulgaris	4	14	3.1
2016-09-21	26.3417	39.3908	Lesvos	Korakas	Diplodus vulgaris	2	10	2.4
2016-09-21	26.3417	39.3908	Lesvos	Korakas	Diplodus vulgaris	4	13	3.9
2016-09-21	26.3417	39.3908	Lesvos	Korakas	Diplodus vulgaris	27	13	5.8
2016-09-21	26.3417	39.3908	Lesvos	Korakas	Mullus surmuletus	5	13	3.9
2016-09-21	26.3417	39.3908	Lesvos	Korakas	Oblada melanura	2	13	1.7
2016-09-21	26.3417	39.3908	Lesvos	Korakas	Sparisoma cretense	2	15	1.8
2016-09-21	26.3417	39.3908	Lesvos	Korakas	Sparisoma cretense	3	12	4.6
2016-09-21	26.3417	39.3908	Lesvos	Korakas	Sarpa salpa	22	13	3.6
2016-09-21	26.3417	39.3908	Lesvos	Korakas	Diplodus annularis	1	12	2.6
2016-09-21	26.3417	39.3908	Lesvos	Korakas	Diplodus annularis	6	10	4.4
2016-09-21	26.3417	39.3908	Lesvos	Korakas	Diplodus sargus	5	9	2.6
2016-09-21	26.3417	39.3908	Lesvos	Korakas	Diplodus sargus	16	14	4.1
2016-09-21	26.3417	39.3908	Lesvos	Korakas	Diplodus sargus	4	16	1.5
2016-09-21	26.3417	39.3908	Lesvos	Korakas	Diplodus sargus	4	12	2.4
2016-09-21	26.3417	39.3908	Lesvos	Korakas	Diplodus vulgaris	4	10	3.1
2016-09-21	26.3417	39.3908	Lesvos	Korakas	Diplodus vulgaris	8	12	1.5
2016-09-21	26.3417	39.3908	Lesvos	Korakas	Diplodus vulgaris	6	11	2.3
2016-09-21	26.3417	39.3908	Lesvos	Korakas	Diplodus vulgaris	15	12	1.6
2016-09-21	26.3417	39.3908	Lesvos	Korakas	Diplodus vulgaris	5	15	2.1
2016-09-21	26.3417	39.3908	Lesvos	Korakas	Diplodus vulgaris	4	15	1.9
2016-09-21	26.3417	39.3908	Lesvos	Korakas	Sparisoma cretense	2	13	2.8
2016-09-21	26.3417	39.3908	Lesvos	Korakas	Sparisoma cretense	1	16	4.3
2016-09-21	26.3417	39.3908	Lesvos	Korakas	Sparisoma cretense	4	14	1.1
2016-09-21	26.3417	39.3908	Lesvos	Korakas	Sarpa salpa	70	15	4.2
2016-09-21	26.3417	39.3908	Lesvos	Korakas	Sarpa salpa	50	13	3.1
2016-09-21	26.3417	39.3908	Lesvos	Korakas	Serranus scriba	1	13	4.2
2016-09-21	26.3417	39.3908	Lesvos	Korakas	Serranus scriba	2	12	1.1
2016-09-21	26.3417	39.3908	Lesvos	Korakas	Diplodus annularis	14	10	2.3
2016-09-21	26.3417	39.3908	Lesvos	Korakas	Diplodus puntazzo	2	12	1.2
2016-09-21	26.3417	39.3908	Lesvos	Korakas	Diplodus sargus	26	9	3.1
2016-09-21	26.3417	39.3908	Lesvos	Korakas	Diplodus sargus	5	14	6.3
2016-09-21	26.3417	39.3908	Lesvos	Korakas	Diplodus sargus	2	11	3.8
2016-09-21	26.3417	39.3908	Lesvos	Korakas	Diplodus sargus	10	12	4.2
2016-09-21	26.3417	39.3908	Lesvos	Korakas	Diplodus sargus	4	18	5.1
2016-09-21	26.3417	39.3908	Lesvos	Korakas	Diplodus sargus	6	14	3.2
2016-09-21	26.3417	39.3908	Lesvos	Korakas	Diplodus vulgaris	4	12	3.1
2016-09-21	26.3417	39.3908	Lesvos	Korakas	Diplodus vulgaris	5	11	2.6
2016-09-21	26.3417	39.3908	Lesvos	Korakas	Diplodus vulgaris	5	18	1.6
2016-09-21	26.3417	39.3908	Lesvos	Korakas	Diplodus vulgaris	4	13	0.6
2016-09-21	26.3417	39.3908	Lesvos	Korakas	Diplodus vulgaris	23	15	1.7
2016-09-21	26.3417	39.3908	Lesvos	Korakas	Diplodus vulgaris	9	17	9.1
2016-09-21	26.3417	39.3908	Lesvos	Korakas	Mullus surmuletus	3	11	2.5
2016-09-21	26.3417	39.3908	Lesvos	Korakas	Sparisoma cretense	5	14	4.6
2016-09-21	26.3417	39.3908	Lesvos	Korakas	Scorpaena notata	1	7	0.1
2016-09-21	26.3417	39.3908	Lesvos	Korakas	Serranus cabrilla	1	12	0.4
2016-09-21	26.3417	39.3908	Lesvos	Korakas	Diplodus annularis	1	12	1.5
2016-09-21	26.3417	39.3908	Lesvos	Korakas	Diplodus puntazzo	1	15	3.2
2016-09-21	26.3417	39.3908	Lesvos	Korakas	Diplodus puntazzo	1	13	4.2
2016-09-21	26.3417	39.3908	Lesvos	Korakas	Diplodus puntazzo	1	19	3.4
2016-09-21	26.3417	39.3908	Lesvos	Korakas	Diplodus sargus	3	18	4.5
2016-09-21	26.3417	39.3908	Lesvos	Korakas	Diplodus sargus	1	18	2.5
2016-09-21	26.3417	39.3908	Lesvos	Korakas	Diplodus sargus	4	19	1.3
2016-09-21	26.3417	39.3908	Lesvos	Korakas	Diplodus sargus	10	36	6.3
2016-09-21	26.3417	39.3908	Lesvos	Korakas	Diplodus sargus	1	19	5.1
2016-09-21	26.3417	39.3908	Lesvos	Korakas	Diplodus vulgaris	2	7	1.4
2016-09-21	26.3417	39.3908	Lesvos	Korakas	Diplodus vulgaris	3	10	1.2
2016-09-21	26.3417	39.3908	Lesvos	Korakas	Diplodus vulgaris	5	13	4.6
2016-09-21	26.3417	39.3908	Lesvos	Korakas	Diplodus vulgaris	4	4	3.3
2016-09-21	26.3417	39.3908	Lesvos	Korakas	Diplodus vulgaris	2	12	4.7
2016-09-21	26.3417	39.3908	Lesvos	Korakas	Diplodus vulgaris	3	14	1.9
2016-09-21	26.3417	39.3908	Lesvos	Korakas	Diplodus vulgaris	2	17	0.6
2016-09-21	26.3417	39.3908	Lesvos	Korakas	Dentex dentex	4	23	6.8
2016-09-21	26.3417	39.3908	Lesvos	Korakas	Dentex dentex	35	29	4.2
2016-09-21	26.3417	39.3908	Lesvos	Korakas	Dentex dentex	5	48	5.1
2016-09-21	26.3417	39.3908	Lesvos	Korakas	Dentex dentex	1	65	5.9
2016-09-21	26.3417	39.3908	Lesvos	Korakas	Mullus surmuletus	8	8	2.3
2016-09-21	26.3417	39.3908	Lesvos	Korakas	Mullus surmuletus	1	11	0.8
2016-09-21	26.3417	39.3908	Lesvos	Korakas	Mullus surmuletus	2	13	1.2
2016-09-21	26.3417	39.3908	Lesvos	Korakas	Sarpa salpa	16	18	2.6
2016-09-21	26.3417	39.3908	Lesvos	Korakas	Serranus scriba	3	11	2.3
2016-09-21	26.3417	39.3908	Lesvos	Korakas	Serranus scriba	2	15	0.4
2016-09-21	26.3417	39.3908	Lesvos	Korakas	Serranus scriba	3	14	3.2
2016-09-21	26.3417	39.3908	Lesvos	Korakas	Serranus scriba	1	15	3.6
2016-09-21	26.3417	39.3908	Lesvos	Korakas	Serranus scriba	2	14	0.2
2016-09-21	26.3417	39.3908	Lesvos	Korakas	Serranus cabrilla	2	13	0.3
2016-09-21	26.3417	39.3908	Lesvos	Korakas	Serranus cabrilla	1	15	1.4
2016-09-21	26.3417	39.3908	Lesvos	Korakas	Diplodus sargus	1	15	1.3
2016-09-21	26.3417	39.3908	Lesvos	Korakas	Diplodus sargus	3	15	2.5
2016-09-21	26.3417	39.3908	Lesvos	Korakas	Diplodus sargus	1	14	0.5
2016-09-21	26.3417	39.3908	Lesvos	Korakas	Diplodus sargus	2	16	5.2
2016-09-21	26.3417	39.3908	Lesvos	Korakas	Diplodus sargus	1	16	0.3
2016-09-21	26.3417	39.3908	Lesvos	Korakas	Diplodus vulgaris	3	12	3.4
2016-09-21	26.3417	39.3908	Lesvos	Korakas	Diplodus vulgaris	3	15	1.7
2016-09-21	26.3417	39.3908	Lesvos	Korakas	Diplodus vulgaris	2	13	4.3
2016-09-21	26.3417	39.3908	Lesvos	Korakas	Diplodus vulgaris	3	9	1.1
2016-09-21	26.3417	39.3908	Lesvos	Korakas	Mullus surmuletus	1	8	0.2
2016-09-21	26.3417	39.3908	Lesvos	Korakas	Mullus surmuletus	3	12	2.6
2016-09-21	26.3417	39.3908	Lesvos	Korakas	Muraena helena	1	85	1.4
2016-09-21	26.3417	39.3908	Lesvos	Korakas	Sparisoma cretense	1	19	5.4
2016-09-21	26.3417	39.3908	Lesvos	Korakas	Sparisoma cretense	3	15	6.1
2016-09-21	26.3417	39.3908	Lesvos	Korakas	Sparisoma cretense	2	13	1.8
2016-09-21	26.3417	39.3908	Lesvos	Korakas	Scorpaena scrofa	1	33	0.3
2016-09-21	26.3417	39.3908	Lesvos	Korakas	Serranus cabrilla	1	8	0.8
2016-09-21	26.3417	39.3908	Lesvos	Korakas	Serranus cabrilla	1	14	0.5
2016-09-21	26.3417	39.3908	Lesvos	Korakas	Serranus cabrilla	1	13	1.2
2016-09-21	26.3417	39.3908	Lesvos	Korakas	Serranus scriba	1	15	1.2
2016-09-21	26.3417	39.3908	Lesvos	Korakas	Serranus scriba	2	14	2.1
2016-09-21	26.3417	39.3908	Lesvos	Korakas	Diplodus annularis	2	9	1.4
2016-09-21	26.3417	39.3908	Lesvos	Korakas	Diplodus annularis	4	10	2.3
2016-09-21	26.3417	39.3908	Lesvos	Korakas	Diplodus puntazzo	1	15	4.7
2016-09-21	26.3417	39.3908	Lesvos	Korakas	Diplodus puntazzo	1	13	2.3
2016-09-21	26.3417	39.3908	Lesvos	Korakas	Diplodus puntazzo	1	15	1.2
2016-09-21	26.3417	39.3908	Lesvos	Korakas	Diplodus sargus	2	13	1.4
2016-09-21	26.3417	39.3908	Lesvos	Korakas	Diplodus sargus	2	15	3.2
2016-09-21	26.3417	39.3908	Lesvos	Korakas	Diplodus sargus	2	16	2.8
2016-09-21	26.3417	39.3908	Lesvos	Korakas	Diplodus sargus	3	11	3.1
2016-09-21	26.3417	39.3908	Lesvos	Korakas	Diplodus sargus	1	17	1.1
2016-09-21	26.3417	39.3908	Lesvos	Korakas	Diplodus sargus	1	12	1
2016-09-21	26.3417	39.3908	Lesvos	Korakas	Diplodus vulgaris	1	10	1.2
2016-09-21	26.3417	39.3908	Lesvos	Korakas	Diplodus vulgaris	3	13	4.1
2016-09-21	26.3417	39.3908	Lesvos	Korakas	Diplodus vulgaris	2	9	2.6
2016-09-21	26.3417	39.3908	Lesvos	Korakas	Diplodus vulgaris	2	14	4.2
2016-09-21	26.3417	39.3908	Lesvos	Korakas	Diplodus vulgaris	2	10	1.5
2016-09-21	26.3417	39.3908	Lesvos	Korakas	Mullus surmuletus	4	10	3.4
2016-09-21	26.3417	39.3908	Lesvos	Korakas	Oblada melanura	1	10	3.2
2016-09-21	26.3417	39.3908	Lesvos	Korakas	Oblada melanura	6	12	4.9
2016-09-21	26.3417	39.3908	Lesvos	Korakas	Sparisoma cretense	1	17	4.2
2016-09-21	26.3417	39.3908	Lesvos	Korakas	Sarpa salpa	4	15	3.6
2016-09-21	26.3417	39.3908	Lesvos	Korakas	Sarpa salpa	7	16	2.5
2016-09-21	26.3417	39.3908	Lesvos	Korakas	Serranus cabrilla	1	13	2.4
2016-09-21	26.3417	39.3908	Lesvos	Korakas	Serranus cabrilla	1	15	0.3
2016-09-21	26.3417	39.3908	Lesvos	Korakas	Serranus cabrilla	1	13	0.2
2016-09-21	26.3417	39.3908	Lesvos	Korakas	Serranus scriba	1	14	0.7
2016-09-22	25.9096	39.2944	Lesvos	Pohi	Diplodus puntazzo	1	12	2.4
2016-09-22	25.9096	39.2944	Lesvos	Pohi	Diplodus puntazzo	2	14	5.3
2016-09-22	25.9096	39.2944	Lesvos	Pohi	Diplodus sargus	1	14	2.3
2016-09-22	25.9096	39.2944	Lesvos	Pohi	Diplodus sargus	1	13	4.1
2016-09-22	25.9096	39.2944	Lesvos	Pohi	Diplodus vulgaris	1	12	2.1
2016-09-22	25.9096	39.2944	Lesvos	Pohi	Diplodus vulgaris	4	13	4.4
2016-09-22	25.9096	39.2944	Lesvos	Pohi	Diplodus vulgaris	4	10	2.8
2016-09-22	25.9096	39.2944	Lesvos	Pohi	Diplodus vulgaris	3	12	3.1
2016-09-22	25.9096	39.2944	Lesvos	Pohi	Sparisoma cretense	2	12	3.2
2016-09-22	25.9096	39.2944	Lesvos	Pohi	Serranus cabrilla	1	14	1.3
2016-09-22	25.9096	39.2944	Lesvos	Pohi	Serranus scriba	1	13	2.4
2016-09-22	25.9096	39.2944	Lesvos	Pohi	Serranus scriba	1	14	1.8
2016-09-22	25.9096	39.2944	Lesvos	Pohi	Serranus scriba	1	12	3.2
2016-09-22	25.9096	39.2944	Lesvos	Pohi	Serranus scriba	1	13	5.4
2016-09-22	25.9096	39.2944	Lesvos	Pohi	Diplodus puntazzo	1	16	2.4
2016-09-22	25.9096	39.2944	Lesvos	Pohi	Diplodus puntazzo	2	13	5.6
2016-09-22	25.9096	39.2944	Lesvos	Pohi	Diplodus sargus	3	14	6.1
2016-09-22	25.9096	39.2944	Lesvos	Pohi	Diplodus sargus	2	15	3.1
2016-09-22	25.9096	39.2944	Lesvos	Pohi	Diplodus vulgaris	17	13	5.1
2016-09-22	25.9096	39.2944	Lesvos	Pohi	Diplodus vulgaris	2	16	3.3
2016-09-22	25.9096	39.2944	Lesvos	Pohi	Diplodus vulgaris	70	14	12.3
2016-09-22	25.9096	39.2944	Lesvos	Pohi	Epinephelus marginatus	1	24	4.8
2016-09-22	25.9096	39.2944	Lesvos	Pohi	Sparisoma cretense	3	12	2.8
2016-09-22	25.9096	39.2944	Lesvos	Pohi	Sparisoma cretense	7	15	1.4
2016-09-22	25.9096	39.2944	Lesvos	Pohi	Sparisoma cretense	8	15	1.2
2016-09-22	25.9096	39.2944	Lesvos	Pohi	Sarpa salpa	34	16	4.9
2016-09-22	25.9096	39.2944	Lesvos	Pohi	Scorpaena porcus	1	8	6.3
2016-09-22	25.9096	39.2944	Lesvos	Pohi	Serranus cabrilla	1	13	3.8
2016-09-22	25.9096	39.2944	Lesvos	Pohi	Serranus scriba	2	14	3.6
2016-09-22	25.9096	39.2944	Lesvos	Pohi	Serranus scriba	2	15	1.4
2016-09-22	25.9096	39.2944	Lesvos	Pohi	Diplodus puntazzo	1	14	3.7
2016-09-22	25.9096	39.2944	Lesvos	Pohi	Diplodus sargus	2	16	1.2
2016-09-22	25.9096	39.2944	Lesvos	Pohi	Diplodus sargus	6	13	4.8
2016-09-22	25.9096	39.2944	Lesvos	Pohi	Diplodus vulgaris	3	14	2.8
2016-09-22	25.9096	39.2944	Lesvos	Pohi	Diplodus vulgaris	2	10	4.9
2016-09-22	25.9096	39.2944	Lesvos	Pohi	Diplodus vulgaris	2	13	3.6
2016-09-22	25.9096	39.2944	Lesvos	Pohi	Diplodus vulgaris	15	14	7.1
2016-09-22	25.9096	39.2944	Lesvos	Pohi	Sparisoma cretense	2	15	0.3
2016-09-22	25.9096	39.2944	Lesvos	Pohi	Sparisoma cretense	3	19	4.2
2016-09-22	25.9096	39.2944	Lesvos	Pohi	Sparisoma cretense	5	14	4.1
2016-09-22	25.9096	39.2944	Lesvos	Pohi	Sarpa salpa	7	15	2.2
2016-09-22	25.9096	39.2944	Lesvos	Pohi	Diplodus annularis	1	11	4.4
2016-09-22	25.9096	39.2944	Lesvos	Pohi	Diplodus annularis	1	10	5.4
2016-09-22	25.9096	39.2944	Lesvos	Pohi	Diplodus vulgaris	3	10	1.2
2016-09-22	25.9096	39.2944	Lesvos	Pohi	Diplodus vulgaris	3	11	5.1
2016-09-22	25.9096	39.2944	Lesvos	Pohi	Diplodus vulgaris	2	8	1.6
2016-09-22	25.9096	39.2944	Lesvos	Pohi	Diplodus vulgaris	2	12	4.3
2016-09-22	25.9096	39.2944	Lesvos	Pohi	Diplodus vulgaris	2	13	3.1
2016-09-22	25.9096	39.2944	Lesvos	Pohi	Diplodus vulgaris	2	14	3.6
2016-09-22	25.9096	39.2944	Lesvos	Pohi	Sparisoma cretense	1	15	5.5
2016-09-22	25.9096	39.2944	Lesvos	Pohi	Sparisoma cretense	1	14	4.8
2016-09-22	25.9096	39.2944	Lesvos	Pohi	Scorpaena porcus	1	6	1.1
2016-09-22	25.9096	39.2944	Lesvos	Pohi	Serranus cabrilla	2	12	0.4
2016-09-22	25.9096	39.2944	Lesvos	Pohi	Serranus cabrilla	1	10	2.3
2016-09-22	25.9096	39.2944	Lesvos	Pohi	Serranus cabrilla	1	14	0.7
2016-09-22	25.9096	39.2944	Lesvos	Pohi	Serranus cabrilla	1	10	0.1
2016-09-22	25.9096	39.2944	Lesvos	Pohi	Serranus scriba	1	17	0.2
2016-09-22	25.9096	39.2944	Lesvos	Pohi	Serranus scriba	2	14	1.3
2016-09-22	25.9096	39.2944	Lesvos	Pohi	Serranus scriba	1	18	0.5
2016-09-22	25.9096	39.2944	Lesvos	Pohi	Serranus scriba	2	15	1.6
2016-09-22	25.9096	39.2944	Lesvos	Pohi	Diplodus sargus	1	16	4.1
2016-09-22	25.9096	39.2944	Lesvos	Pohi	Diplodus vulgaris	1	11	2.3
2016-09-22	25.9096	39.2944	Lesvos	Pohi	Sparisoma cretense	1	12	0.7
2016-09-22	25.9096	39.2944	Lesvos	Pohi	Sparisoma cretense	3	9	0.5
2016-09-22	25.9096	39.2944	Lesvos	Pohi	Serranus cabrilla	1	13	1.4
2016-09-22	25.9096	39.2944	Lesvos	Pohi	Serranus cabrilla	1	12	3.1
2016-09-22	25.9096	39.2944	Lesvos	Pohi	Serranus scriba	1	14	0.4
2016-09-22	25.9096	39.2944	Lesvos	Pohi	Diplodus annularis	5	11	3.2
2016-09-22	25.9096	39.2944	Lesvos	Pohi	Diplodus puntazzo	1	15	3.2
2016-09-22	25.9096	39.2944	Lesvos	Pohi	Diplodus vulgaris	2	8	3.4
2016-09-22	25.9096	39.2944	Lesvos	Pohi	Diplodus vulgaris	2	10	2.6
2016-09-22	25.9096	39.2944	Lesvos	Pohi	Diplodus vulgaris	2	13	2.1
2016-09-22	25.9096	39.2944	Lesvos	Pohi	Diplodus vulgaris	12	15	5.8
2016-09-22	25.9096	39.2944	Lesvos	Pohi	Diplodus vulgaris	2	15	0.2
2016-09-22	25.9096	39.2944	Lesvos	Pohi	Diplodus vulgaris	1	6	0.7
2016-09-22	25.9096	39.2944	Lesvos	Pohi	Diplodus vulgaris	3	12	1.5
2016-09-22	25.9096	39.2944	Lesvos	Pohi	Mullus surmuletus	2	10	4.2
2016-09-22	25.9096	39.2944	Lesvos	Pohi	Oblada melanura	19	14	3.9
2016-09-22	25.9096	39.2944	Lesvos	Pohi	Sparisoma cretense	5	14	2.9
2016-09-22	25.9096	39.2944	Lesvos	Pohi	Serranus cabrilla	1	12	2.7
2016-09-22	25.9096	39.2944	Lesvos	Pohi	Serranus cabrilla	1	15	0.4
2016-09-22	25.9096	39.2944	Lesvos	Pohi	Serranus scriba	1	15	1.3
2016-10-12	24.9645	37.4149	Syros	Kremasti-Azol	Diplodus sargus	2	8	1.4
2016-10-12	24.9645	37.4149	Syros	Kremasti-Azol	Diplodus vulgaris	3	13	1.2
2016-10-12	24.9645	37.4149	Syros	Kremasti-Azol	Diplodus vulgaris	2	9	0.3
2016-10-12	24.9645	37.4149	Syros	Kremasti-Azol	Diplodus vulgaris	2	14	1.8
2016-10-12	24.9645	37.4149	Syros	Kremasti-Azol	Mullus surmuletus	1	11	0.9
2016-10-12	24.9645	37.4149	Syros	Kremasti-Azol	Oblada melanura	3	7	2.1
2016-10-12	24.9645	37.4149	Syros	Kremasti-Azol	Oblada melanura	21	5	2.2
2016-10-12	24.9645	37.4149	Syros	Kremasti-Azol	Sparisoma cretense	4	15	1.4
2016-10-12	24.9645	37.4149	Syros	Kremasti-Azol	Serranus cabrilla	1	13	1.2
2016-10-12	24.9645	37.4149	Syros	Kremasti-Azol	Serranus cabrilla	1	11	0.8
2016-10-12	24.9645	37.4149	Syros	Kremasti-Azol	Serranus cabrilla	1	9	0.3
2016-10-12	24.9645	37.4149	Syros	Kremasti-Azol	Serranus cabrilla	1	12	3.2
2016-10-12	24.9645	37.4149	Syros	Kremasti-Azol	Scorpaena notata	1	7	0.3
2016-10-12	24.9645	37.4149	Syros	Kremasti-Azol	Scorpaena porcus	1	7	0.5
2016-10-12	24.9645	37.4149	Syros	Kremasti-Azol	Scorpaena porcus	1	8	0.1
2016-10-12	24.9645	37.4149	Syros	Kremasti-Azol	Serranus scriba	1	16	0.7
2016-10-12	24.9645	37.4149	Syros	Kremasti-Azol	Siganus luridus	7	13	0.4
2016-10-12	24.9645	37.4149	Syros	Kremasti-Azol	Siganus luridus	5	15	2.3
2016-10-12	24.9645	37.4149	Syros	Kremasti-Azol	Siganus luridus	8	15	3.1
2016-10-12	24.9645	37.4149	Syros	Kremasti-Azol	Siganus luridus	5	12	4.2
2016-10-12	24.9645	37.4149	Syros	Kremasti-Azol	Siganus luridus	2	14	1.3
2016-10-12	24.9645	37.4149	Syros	Kremasti-Azol	Siganus luridus	3	15	2.8
2016-10-12	24.9645	37.4149	Syros	Kremasti-Azol	Siganus luridus	6	15	3.1
2016-10-12	24.9645	37.4149	Syros	Kremasti-Azol	Diplodus annularis	2	10	1.7
2016-10-12	24.9645	37.4149	Syros	Kremasti-Azol	Diplodus annularis	1	11	5.3
	24.9645	37.4149	Syros	Kremasti-Azol	Diplodus sargus	1	12	1.2
	24.9645	37.4149	Syros	Kremasti-Azol	Diplodus sargus	2	13	1.9
	24.9645	37.4149	Syros	Kremasti-Azol	Diplodus sargus	1	14	1.3
	24.9645	37.4149	Syros	Kremasti-Azol	Diplodus vulgaris	2	10	0.8
	24.9645	37.4149	Syros	Kremasti-Azol	Diplodus vulgaris	1	11	4.3
	24.9645	37.4149	Syros	Kremasti-Azol	Diplodus vulgaris	1	11	0.8
	24.9645	37.4149	Syros	Kremasti-Azol	Oblada melanura	60	6	1.1
	24.9645	37.4149	Syros	Kremasti-Azol	Oblada melanura	2	14	2.6
	24.9645	37.4149	Syros	Kremasti-Azol	Serranus cabrilla	1	11	0.2
	24.9645	37.4149	Syros	Kremasti-Azol	Serranus cabrilla	1	15	3.3
	24.9645	37.4149	Syros	Kremasti-Azol	Siganus luridus	2	14	3.5
	24.9645	37.4149	Syros	Kremasti-Azol	Siganus luridus	3	13	2.9
	24.9645	37.4149	Syros	Kremasti-Azol	Siganus rivulatus	2	17	4.4
	24.9645	37.4149	Syros	Kremasti-Azol	Diplodus annularis	2	11	4.9
	24.9645	37.4149	Syros	Kremasti-Azol	Diplodus vulgaris	1	12	0.6
	24.9645	37.4149	Syros	Kremasti-Azol	Diplodus vulgaris	2	10	3.6
	24.9645	37.4149	Syros	Kremasti-Azol	Sparisoma cretense	2	13	1.7
	24.9645	37.4149	Syros	Kremasti-Azol	Sparisoma cretense	1	10	1.8
	24.9645	37.4149	Syros	Kremasti-Azol	Sparisoma cretense	2	9	0.5
	24.9645	37.4149	Syros	Kremasti-Azol	Serranus cabrilla	1	13	0.9
	24.9645	37.4149	Syros	Kremasti-Azol	Serranus cabrilla	1	8	0.5
2016-10-12	24.9645	37.4149	Syros	Kremasti-Azol	Siganus luridus	2	13	3.2
2016-10-12	24.9645	37.4149	Syros	Kremasti-Azol	Siganus luridus	4	15	2.4
	24.9645	37.4149	Syros	Kremasti-Azol	Siganus luridus	3	13	2.2
	24.9645	37.4149	Syros	Kremasti-Azol	Siganus luridus	3	12	1.5
	24.9645	37.4149	Syros	Kremasti-Azol	Siganus luridus	4	12	1.8
	24.9645	37.4149	Syros	Kremasti-Azol	Siganus luridus	2	11	2.1
2016-10-12	24.9645	37.4149	Syros	Kremasti-Azol	Siganus luridus	3	15	0.4
2016-10-13	24.7517	37.5822	Gyaros	Glaronisi	Diplodus sargus	1	10	2.1
2016-10-13	24.7517	37.5822	Gyaros	Glaronisi	Diplodus vulgaris	2	14	3.1
2016-10-13	24.7517	37.5822	Gyaros	Glaronisi	Diplodus vulgaris	2	16	6.1
2016-10-13	24.7517	37.5822	Gyaros	Glaronisi	Mullus surmuletus	2	14	2.1
2016-10-13	24.7517	37.5822	Gyaros	Glaronisi	Mullus surmuletus	3	15	5.6
2016-10-13	24.7517	37.5822	Gyaros	Glaronisi	Oblada melanura	1	12	1.3
2016-10-13	24.7517	37.5822	Gyaros	Glaronisi	Oblada melanura	1	13	0.7
2016-10-13	24.7517	37.5822	Gyaros	Glaronisi	Sparisoma cretense	3	14	1.4
2016-10-13	24.7517	37.5822	Gyaros	Glaronisi	Sparisoma cretense	3	12	2.1
2016-10-13	24.7517	37.5822	Gyaros	Glaronisi	Sparisoma cretense	2	15	0.8
2016-10-13	24.7517	37.5822	Gyaros	Glaronisi	Sparisoma cretense	2	23	5.2
2016-10-13	24.7517	37.5822	Gyaros	Glaronisi	Sparisoma cretense	4	18	2.2
2016-10-13	24.7517	37.5822	Gyaros	Glaronisi	Sparisoma cretense	3	14	3.9
2016-10-13	24.7517	37.5822	Gyaros	Glaronisi	Sparisoma cretense	8	12	2.6
2016-10-13	24.7517	37.5822	Gyaros	Glaronisi	Sparisoma cretense	4	11	4.2
2016-10-13	24.7517	37.5822	Gyaros	Glaronisi	Scorpaena porcus	1	6	0.1
2016-10-13	24.7517	37.5822	Gyaros	Glaronisi	Scorpaena porcus	1	5	0.2
2016-10-13	24.7517	37.5822	Gyaros	Glaronisi	Serranus scriba	1	12	0.1
2016-10-13	24.7517	37.5822	Gyaros	Glaronisi	Serranus scriba	1	15	1.2
2016-10-13	24.7517	37.5822	Gyaros	Glaronisi	Siganus luridus	4	15	0.8
2016-10-13	24.7517	37.5822	Gyaros	Glaronisi	Siganus luridus	2	16	1.3
2016-10-13	24.7517	37.5822	Gyaros	Glaronisi	Siganus luridus	5	15	1.7
2016-10-13	24.7517	37.5822	Gyaros	Glaronisi	Siganus luridus	4	8	0.1
2016-10-13	24.7517	37.5822	Gyaros	Glaronisi	Siganus luridus	3	12	4.4
2016-10-13	24.7517	37.5822	Gyaros	Glaronisi	Siganus luridus	6	16	3.2
2016-10-13	24.7517	37.5822	Gyaros	Glaronisi	Siganus luridus	3	7	1.2
2016-10-13	24.7517	37.5822	Gyaros	Glaronisi	Diplodus sargus	1	17	0.3
2016-10-13	24.7517	37.5822	Gyaros	Glaronisi	Diplodus vulgaris	3	15	2.2
2016-10-13	24.7517	37.5822	Gyaros	Glaronisi	Diplodus vulgaris	7	18	5.3
2016-10-13	24.7517	37.5822	Gyaros	Glaronisi	Diplodus vulgaris	6	16	6.4
2016-10-13	24.7517	37.5822	Gyaros	Glaronisi	Diplodus vulgaris	3	14	1.6
2016-10-13	24.7517	37.5822	Gyaros	Glaronisi	Diplodus vulgaris	7	18	6.3
2016-10-13	24.7517	37.5822	Gyaros	Glaronisi	Epinephelus costae	1	7	0.2
2016-10-13	24.7517	37.5822	Gyaros	Glaronisi	Epinephelus costae	1	31	5.4
2016-10-13	24.7517	37.5822	Gyaros	Glaronisi	Epinephelus costae	1	6	0.8
2016-10-13	24.7517	37.5822	Gyaros	Glaronisi	Sparisoma cretense	4	13	3.2
2016-10-13	24.7517	37.5822	Gyaros	Glaronisi	Sparisoma cretense	3	10	1.6
2016-10-13	24.7517	37.5822	Gyaros	Glaronisi	Sparisoma cretense	4	9	0.8
2016-10-13	24.7517	37.5822	Gyaros	Glaronisi	Sparisoma cretense	5	7	3.1
2016-10-13	24.7517	37.5822	Gyaros	Glaronisi	Sparisoma cretense	1	23	5.5
2016-10-13	24.7517	37.5822	Gyaros	Glaronisi	Sparisoma cretense	4	14	2.1
2016-10-13	24.7517	37.5822	Gyaros	Glaronisi	Sparisoma cretense	4	17	2.5
2016-10-13	24.7517	37.5822	Gyaros	Glaronisi	Sparisoma cretense	4	19	4.2
2016-10-13	24.7517	37.5822	Gyaros	Glaronisi	Scorpaena porcus	1	6	0.1
2016-10-13	24.7517	37.5822	Gyaros	Glaronisi	Scorpaena porcus	1	5	0
2016-10-13	24.7517	37.5822	Gyaros	Glaronisi	Scorpaena porcus	1	8	0.1
2016-10-13	24.7517	37.5822	Gyaros	Glaronisi	Serranus scriba	1	16	3.2
2016-10-13	24.7517	37.5822	Gyaros	Glaronisi	Serranus scriba	1	17	7.2
2016-10-13	24.7517	37.5822	Gyaros	Glaronisi	Siganus luridus	4	16	4.3
2016-10-13	24.7517	37.5822	Gyaros	Glaronisi	Siganus luridus	5	15	3.2
2016-10-13	24.7517	37.5822	Gyaros	Glaronisi	Siganus luridus	19	11	4.2
2016-10-13	24.7517	37.5822	Gyaros	Glaronisi	Siganus luridus	23	8	0.3
2016-10-13	24.7517	37.5822	Gyaros	Glaronisi	Siganus luridus	5	17	3.4
2016-10-13	24.7517	37.5822	Gyaros	Glaronisi	Siganus luridus	3	15	2.4
2016-10-13	24.7517	37.5822	Gyaros	Glaronisi	Diplodus sargus	1	17	2.5
2016-10-13	24.7517	37.5822	Gyaros	Glaronisi	Diplodus sargus	1	18	2.3
2016-10-13	24.7517	37.5822	Gyaros	Glaronisi	Diplodus vulgaris	1	18	2.2
2016-10-13	24.7517	37.5822	Gyaros	Glaronisi	Diplodus vulgaris	5	16	1.3
2016-10-13	24.7517	37.5822	Gyaros	Glaronisi	Diplodus vulgaris	2	15	0.3
2016-10-13	24.7517	37.5822	Gyaros	Glaronisi	Diplodus vulgaris	3	12	3.2
2016-10-13	24.7517	37.5822	Gyaros	Glaronisi	Diplodus vulgaris	2	19	0.3
2016-10-13	24.7517	37.5822	Gyaros	Glaronisi	Mullus surmuletus	2	13	3.2
2016-10-13	24.7517	37.5822	Gyaros	Glaronisi	Oblada melanura	2	14	4.2
2016-10-13	24.7517	37.5822	Gyaros	Glaronisi	Sparisoma cretense	1	25	3.5
2016-10-13	24.7517	37.5822	Gyaros	Glaronisi	Sparisoma cretense	5	16	6.2
2016-10-13	24.7517	37.5822	Gyaros	Glaronisi	Sparisoma cretense	2	25	0.8
2016-10-13	24.7517	37.5822	Gyaros	Glaronisi	Sparisoma cretense	4	17	1.3
2016-10-13	24.7517	37.5822	Gyaros	Glaronisi	Sparisoma cretense	7	17	2.2
2016-10-13	24.7517	37.5822	Gyaros	Glaronisi	Sparisoma cretense	2	18	4.5
2016-10-13	24.7517	37.5822	Gyaros	Glaronisi	Sparisoma cretense	2	16	4.1
2016-10-13	24.7517	37.5822	Gyaros	Glaronisi	Sparisoma cretense	5	12	3.6
2016-10-13	24.7517	37.5822	Gyaros	Glaronisi	Sparisoma cretense	1	23	2.4
2016-10-13	24.7517	37.5822	Gyaros	Glaronisi	Sparisoma cretense	3	10	3.2
2016-10-13	24.7517	37.5822	Gyaros	Glaronisi	Sparisoma cretense	3	16	0.1
2016-10-13	24.7517	37.5822	Gyaros	Glaronisi	Sparisoma cretense	2	19	1.2
2016-10-13	24.7517	37.5822	Gyaros	Glaronisi	Serranus scriba	2	10	0.5
2016-10-13	24.7517	37.5822	Gyaros	Glaronisi	Serranus scriba	1	17	1.3
2016-10-13	24.7517	37.5822	Gyaros	Glaronisi	Siganus luridus	5	14	3.2
2016-10-13	24.7517	37.5822	Gyaros	Glaronisi	Siganus luridus	6	18	1.7
2016-10-13	24.7517	37.5822	Gyaros	Glaronisi	Siganus luridus	2	13	4.1
2016-10-13	24.7517	37.5822	Gyaros	Glaronisi	Siganus luridus	3	16	0.7
2016-10-13	24.7517	37.5822	Gyaros	Glaronisi	Spondiliosoma cantharus	1	15	5.1
2016-10-13	24.7517	37.5822	Gyaros	Glaronisi	Diplodus vulgaris	1	9	1.2
2016-10-13	24.7517	37.5822	Gyaros	Glaronisi	Diplodus vulgaris	2	11	3.1
2016-10-13	24.7517	37.5822	Gyaros	Glaronisi	Sparisoma cretense	3	15	1.2
2016-10-13	24.7517	37.5822	Gyaros	Glaronisi	Sparisoma cretense	1	22	2.9
2016-10-13	24.7517	37.5822	Gyaros	Glaronisi	Sparisoma cretense	8	12	1.1
2016-10-13	24.7517	37.5822	Gyaros	Glaronisi	Sparisoma cretense	4	12	1.5
2016-10-13	24.7517	37.5822	Gyaros	Glaronisi	Sparisoma cretense	5	13	1.2
2016-10-13	24.7517	37.5822	Gyaros	Glaronisi	Sparisoma cretense	3	10	0.7
2016-10-13	24.7517	37.5822	Gyaros	Glaronisi	Sparisoma cretense	4	18	1.2
2016-10-13	24.7517	37.5822	Gyaros	Glaronisi	Siganus luridus	4	13	0.8
2016-10-13	24.7517	37.5822	Gyaros	Glaronisi	Siganus luridus	7	9	1.3
2016-10-13	24.7517	37.5822	Gyaros	Glaronisi	Siganus luridus	2	15	1.1
2016-10-13	24.7517	37.5822	Gyaros	Glaronisi	Siganus luridus	2	12	2.4
2016-10-13	24.7517	37.5822	Gyaros	Glaronisi	Siganus luridus	2	10	3.2
2016-10-13	24.7517	37.5822	Gyaros	Glaronisi	Diplodus sargus	1	10	1.4
2016-10-13	24.7517	37.5822	Gyaros	Glaronisi	Diplodus sargus	2	12	0.7
2016-10-13	24.7517	37.5822	Gyaros	Glaronisi	Diplodus sargus	1	12	3.2
2016-10-13	24.7517	37.5822	Gyaros	Glaronisi	Diplodus vulgaris	1	13	3.1
2016-10-13	24.7517	37.5822	Gyaros	Glaronisi	Diplodus vulgaris	1	12	2.1
2016-10-13	24.7517	37.5822	Gyaros	Glaronisi	Diplodus vulgaris	2	14	3.4
2016-10-13	24.7517	37.5822	Gyaros	Glaronisi	Diplodus vulgaris	3	12	0.6
2016-10-13	24.7517	37.5822	Gyaros	Glaronisi	Oblada melanura	3	10	4.1
2016-10-13	24.7517	37.5822	Gyaros	Glaronisi	Sparisoma cretense	3	15	4.1
2016-10-13	24.7517	37.5822	Gyaros	Glaronisi	Sparisoma cretense	5	13	3.2
2016-10-13	24.7517	37.5822	Gyaros	Glaronisi	Sparisoma cretense	2	23	1.1
2016-10-13	24.7517	37.5822	Gyaros	Glaronisi	Sparisoma cretense	4	7	0.3
2016-10-13	24.7517	37.5822	Gyaros	Glaronisi	Sparisoma cretense	3	15	1.1
2016-10-13	24.7517	37.5822	Gyaros	Glaronisi	Siganus luridus	5	9	4.7
2016-10-13	24.7517	37.5822	Gyaros	Glaronisi	Siganus luridus	2	13	5.2
2016-10-13	24.7517	37.5822	Gyaros	Glaronisi	Siganus luridus	3	14	0.7
2016-10-13	24.7517	37.5822	Gyaros	Glaronisi	Siganus luridus	3	15	1.2
2016-10-13	24.7517	37.5822	Gyaros	Glaronisi	Siganus luridus	4	15	1.2
2016-10-13	24.7517	37.5822	Gyaros	Glaronisi	Siganus rivulatus	3	12	4.1
2016-10-13	24.7517	37.5822	Gyaros	Glaronisi	Diplodus sargus	1	10	2.2
2016-10-13	24.7517	37.5822	Gyaros	Glaronisi	Diplodus sargus	2	11	4.5
2016-10-13	24.7517	37.5822	Gyaros	Glaronisi	Diplodus sargus	3	12	2.1
2016-10-13	24.7517	37.5822	Gyaros	Glaronisi	Diplodus vulgaris	1	12	2.1
2016-10-13	24.7517	37.5822	Gyaros	Glaronisi	Diplodus vulgaris	2	14	3.4
2016-10-13	24.7517	37.5822	Gyaros	Glaronisi	Diplodus vulgaris	3	12	0.6
2016-10-13	24.7517	37.5822	Gyaros	Glaronisi	Diplodus vulgaris	1	13	3.1
2016-10-13	24.7517	37.5822	Gyaros	Glaronisi	Oblada melanura	1	13	4.2
2016-10-13	24.7517	37.5822	Gyaros	Glaronisi	Oblada melanura	5	8	1.2
2016-10-13	24.7517	37.5822	Gyaros	Glaronisi	Sparisoma cretense	3	18	0.7
2016-10-13	24.7517	37.5822	Gyaros	Glaronisi	Sparisoma cretense	3	9	1.7
2016-10-13	24.7517	37.5822	Gyaros	Glaronisi	Sparisoma cretense	5	12	3.1
2016-10-13	24.7517	37.5822	Gyaros	Glaronisi	Sarpa salpa	6	12	3.5
2016-10-13	24.7517	37.5822	Gyaros	Glaronisi	Serranus scriba	1	15	3.1
2016-10-13	24.7517	37.5822	Gyaros	Glaronisi	Siganus luridus	2	4	0.6
2016-10-13	24.7517	37.5822	Gyaros	Glaronisi	Siganus luridus	3	9	2.7
2016-10-13	24.7517	37.5822	Gyaros	Glaronisi	Siganus luridus	3	12	3.1
2016-10-13	24.7517	37.5822	Gyaros	Glaronisi	Siganus luridus	2	7	1.5
2016-10-13	24.7517	37.5822	Gyaros	Glaronisi	Siganus luridus	7	13	3.2
2016-10-13	24.7076	37.5934	Gyaros	Gyaros 2	Diplodus sargus	3	13	1.4
2016-10-13	24.7076	37.5934	Gyaros	Gyaros 2	Diplodus sargus	2	13	0.7
2016-10-13	24.7076	37.5934	Gyaros	Gyaros 2	Diplodus vulgaris	5	14	0.8
2016-10-13	24.7076	37.5934	Gyaros	Gyaros 2	Diplodus vulgaris	2	16	1.4
2016-10-13	24.7076	37.5934	Gyaros	Gyaros 2	Diplodus vulgaris	3	14	4.5
2016-10-13	24.7076	37.5934	Gyaros	Gyaros 2	Diplodus vulgaris	6	13	2.5
2016-10-13	24.7076	37.5934	Gyaros	Gyaros 2	Diplodus vulgaris	13	15	3.6
2016-10-13	24.7076	37.5934	Gyaros	Gyaros 2	Diplodus vulgaris	2	17	1.2
2016-10-13	24.7076	37.5934	Gyaros	Gyaros 2	Diplodus vulgaris	4	15	0.6
2016-10-13	24.7076	37.5934	Gyaros	Gyaros 2	Diplodus vulgaris	4	13	3.5
2016-10-13	24.7076	37.5934	Gyaros	Gyaros 2	Epinephelus costae	1	27	5.6
2016-10-13	24.7076	37.5934	Gyaros	Gyaros 2	Sparisoma cretense	5	16	1.1
2016-10-13	24.7076	37.5934	Gyaros	Gyaros 2	Sparisoma cretense	3	8	0.6
2016-10-13	24.7076	37.5934	Gyaros	Gyaros 2	Sparisoma cretense	4	10	1.7
2016-10-13	24.7076	37.5934	Gyaros	Gyaros 2	Sparisoma cretense	3	24	1.5
2016-10-13	24.7076	37.5934	Gyaros	Gyaros 2	Sparisoma cretense	2	18	0.9
2016-10-13	24.7076	37.5934	Gyaros	Gyaros 2	Scorpaena porcus	1	5	0.1
2016-10-13	24.7076	37.5934	Gyaros	Gyaros 2	Serranus cabrilla	1	8	0.1
2016-10-13	24.7076	37.5934	Gyaros	Gyaros 2	Serranus cabrilla	2	15	3.5
2016-10-13	24.7076	37.5934	Gyaros	Gyaros 2	Serranus cabrilla	1	12	0.1
2016-10-13	24.7076	37.5934	Gyaros	Gyaros 2	Siganus luridus	4	17	3.2
2016-10-13	24.7076	37.5934	Gyaros	Gyaros 2	Siganus luridus	8	18	6.1
2016-10-13	24.7076	37.5934	Gyaros	Gyaros 2	Siganus luridus	6	15	1.7
2016-10-13	24.7076	37.5934	Gyaros	Gyaros 2	Siganus luridus	3	19	2.3
2016-10-13	24.7076	37.5934	Gyaros	Gyaros 2	Diplodus sargus	1	16	4.2
2016-10-13	24.7076	37.5934	Gyaros	Gyaros 2	Diplodus sargus	1	14	3.7
2016-10-13	24.7076	37.5934	Gyaros	Gyaros 2	Diplodus sargus	1	13	3.1
2016-10-13	24.7076	37.5934	Gyaros	Gyaros 2	Diplodus sargus	3	15	4.2
2016-10-13	24.7076	37.5934	Gyaros	Gyaros 2	Diplodus vulgaris	2	14	3.1
2016-10-13	24.7076	37.5934	Gyaros	Gyaros 2	Diplodus vulgaris	2	15	1.2
2016-10-13	24.7076	37.5934	Gyaros	Gyaros 2	Diplodus vulgaris	4	13	3.6
2016-10-13	24.7076	37.5934	Gyaros	Gyaros 2	Diplodus vulgaris	3	14	4.2
2016-10-13	24.7076	37.5934	Gyaros	Gyaros 2	Diplodus vulgaris	3	10	3.7
2016-10-13	24.7076	37.5934	Gyaros	Gyaros 2	Diplodus vulgaris	4	12	2.9
2016-10-13	24.7076	37.5934	Gyaros	Gyaros 2	Diplodus vulgaris	5	12	1.6
2016-10-13	24.7076	37.5934	Gyaros	Gyaros 2	Diplodus vulgaris	4	9	1.8
2016-10-13	24.7076	37.5934	Gyaros	Gyaros 2	Diplodus vulgaris	3	15	2.7
2016-10-13	24.7076	37.5934	Gyaros	Gyaros 2	Sparisoma cretense	4	11	2.5
2016-10-13	24.7076	37.5934	Gyaros	Gyaros 2	Sparisoma cretense	4	9	3.6
2016-10-13	24.7076	37.5934	Gyaros	Gyaros 2	Scorpaena notata	1	5	0.1
2016-10-13	24.7076	37.5934	Gyaros	Gyaros 2	Scorpaena porcus	1	5	0
2016-10-13	24.7076	37.5934	Gyaros	Gyaros 2	Scorpaena porcus	1	8	0.1
2016-10-13	24.7076	37.5934	Gyaros	Gyaros 2	Siganus luridus	3	16	1.4
2016-10-13	24.7076	37.5934	Gyaros	Gyaros 2	Siganus luridus	5	10	2.3
2016-10-13	24.7076	37.5934	Gyaros	Gyaros 2	Siganus luridus	2	14	0.8
2016-10-13	24.7076	37.5934	Gyaros	Gyaros 2	Siganus luridus	3	16	2.9
2016-10-13	24.7076	37.5934	Gyaros	Gyaros 2	Diplodus sargus	1	18	2.3
2016-10-13	24.7076	37.5934	Gyaros	Gyaros 2	Diplodus sargus	2	13	4.1
2016-10-13	24.7076	37.5934	Gyaros	Gyaros 2	Diplodus sargus	1	18	4.4
2016-10-13	24.7076	37.5934	Gyaros	Gyaros 2	Diplodus vulgaris	5	14	2.3
2016-10-13	24.7076	37.5934	Gyaros	Gyaros 2	Diplodus vulgaris	7	13	1.5
2016-10-13	24.7076	37.5934	Gyaros	Gyaros 2	Diplodus vulgaris	8	14	2.6
2016-10-13	24.7076	37.5934	Gyaros	Gyaros 2	Diplodus vulgaris	4	14	2.8
2016-10-13	24.7076	37.5934	Gyaros	Gyaros 2	Diplodus vulgaris	5	16	1.4
2016-10-13	24.7076	37.5934	Gyaros	Gyaros 2	Diplodus vulgaris	7	15	4.8
2016-10-13	24.7076	37.5934	Gyaros	Gyaros 2	Diplodus vulgaris	5	14	2.1
2016-10-13	24.7076	37.5934	Gyaros	Gyaros 2	Diplodus vulgaris	5	12	3.9
2016-10-13	24.7076	37.5934	Gyaros	Gyaros 2	Epinephelus costae	1	24	3.8
2016-10-13	24.7076	37.5934	Gyaros	Gyaros 2	Epinephelus costae	1	22	2.7
2016-10-13	24.7076	37.5934	Gyaros	Gyaros 2	Epinephelus costae	1	18	5.2
2016-10-13	24.7076	37.5934	Gyaros	Gyaros 2	Epinephelus costae	1	17	3.4
2016-10-13	24.7076	37.5934	Gyaros	Gyaros 2	Epinephelus costae	1	24	5.1
2016-10-13	24.7076	37.5934	Gyaros	Gyaros 2	Mullus surmuletus	2	15	4.1
2016-10-13	24.7076	37.5934	Gyaros	Gyaros 2	Sparisoma cretense	1	25	3.5
2016-10-13	24.7076	37.5934	Gyaros	Gyaros 2	Sparisoma cretense	7	14	3.6
2016-10-13	24.7076	37.5934	Gyaros	Gyaros 2	Sparisoma cretense	11	13	3.3
2016-10-13	24.7076	37.5934	Gyaros	Gyaros 2	Sparisoma cretense	3	14	2.6
2016-10-13	24.7076	37.5934	Gyaros	Gyaros 2	Sparisoma cretense	2	15	3.7
2016-10-13	24.7076	37.5934	Gyaros	Gyaros 2	Sparisoma cretense	3	15	2.6
2016-10-13	24.7076	37.5934	Gyaros	Gyaros 2	Sparisoma cretense	4	12	3.8
2016-10-13	24.7076	37.5934	Gyaros	Gyaros 2	Scorpaena notata	1	5	0.3
2016-10-13	24.7076	37.5934	Gyaros	Gyaros 2	Scorpaena porcus	1	12	4.6
2016-10-13	24.7076	37.5934	Gyaros	Gyaros 2	Serranus cabrilla	1	13	1.1
2016-10-13	24.7076	37.5934	Gyaros	Gyaros 2	Serranus cabrilla	2	14	3.6
2016-10-13	24.7076	37.5934	Gyaros	Gyaros 2	Serranus cabrilla	1	12	0.1
2016-10-13	24.7076	37.5934	Gyaros	Gyaros 2	Serranus cabrilla	1	14	1.4
2016-10-13	24.7076	37.5934	Gyaros	Gyaros 2	Serranus cabrilla	1	13	4.2
2016-10-13	24.7076	37.5934	Gyaros	Gyaros 2	Serranus scriba	2	10	0.5
2016-10-13	24.7076	37.5934	Gyaros	Gyaros 2	Serranus scriba	1	17	3.2
2016-10-13	24.7076	37.5934	Gyaros	Gyaros 2	Serranus scriba	1	15	1.2
2016-10-13	24.7076	37.5934	Gyaros	Gyaros 2	Siganus luridus	6	14	1.8
2016-10-13	24.7076	37.5934	Gyaros	Gyaros 2	Siganus luridus	10	15	2.9
2016-10-13	24.7076	37.5934	Gyaros	Gyaros 2	Siganus luridus	3	16	5.7
2016-10-13	24.7076	37.5934	Gyaros	Gyaros 2	Siganus luridus	2	12	1.4
2016-10-13	24.7076	37.5934	Gyaros	Gyaros 2	Siganus luridus	5	14	4.2
2016-10-13	24.7076	37.5934	Gyaros	Gyaros 2	Siganus luridus	2	17	5.9
2016-10-13	24.7076	37.5934	Gyaros	Gyaros 2	Spondiliosoma cantharus	4	13	6.7
2016-10-13	24.7076	37.5934	Gyaros	Gyaros 2	Spondiliosoma cantharus	2	12	2.9
2016-10-13	24.7076	37.5934	Gyaros	Gyaros 2	Diplodus sargus	2	15	1.9
2016-10-13	24.7076	37.5934	Gyaros	Gyaros 2	Diplodus sargus	3	23	5.2
2016-10-13	24.7076	37.5934	Gyaros	Gyaros 2	Diplodus vulgaris	4	13	2.6
2016-10-13	24.7076	37.5934	Gyaros	Gyaros 2	Epinephelus marginatus	1	13	2.6
2016-10-13	24.7076	37.5934	Gyaros	Gyaros 2	Mullus surmuletus	1	22	5.4
2016-10-13	24.7076	37.5934	Gyaros	Gyaros 2	Oblada melanura	15	13	4.2
2016-10-13	24.7076	37.5934	Gyaros	Gyaros 2	Oblada melanura	18	15	2.9
2016-10-13	24.7076	37.5934	Gyaros	Gyaros 2	Sparisoma cretense	5	11	2.3
2016-10-13	24.7076	37.5934	Gyaros	Gyaros 2	Sparisoma cretense	6	14	1.5
2016-10-13	24.7076	37.5934	Gyaros	Gyaros 2	Scorpaena porcus	2	8	0.4
2016-10-13	24.7076	37.5934	Gyaros	Gyaros 2	Siganus luridus	3	18	3.1
2016-10-13	24.7076	37.5934	Gyaros	Gyaros 2	Siganus luridus	2	15	3.2
2016-10-13	24.7076	37.5934	Gyaros	Gyaros 2	Siganus luridus	4	14	2.6
2016-10-13	24.7076	37.5934	Gyaros	Gyaros 2	Siganus luridus	5	10	2.4
2016-10-13	24.7076	37.5934	Gyaros	Gyaros 2	Diplodus sargus	1	17	2.2
2016-10-13	24.7076	37.5934	Gyaros	Gyaros 2	Diplodus sargus	4	15	3.7
2016-10-13	24.7076	37.5934	Gyaros	Gyaros 2	Diplodus sargus	3	14	2.1
2016-10-13	24.7076	37.5934	Gyaros	Gyaros 2	Diplodus sargus	2	16	1.9
2016-10-13	24.7076	37.5934	Gyaros	Gyaros 2	Diplodus sargus	4	15	2.4
2016-10-13	24.7076	37.5934	Gyaros	Gyaros 2	Diplodus sargus	2	25	1.3
2016-10-13	24.7076	37.5934	Gyaros	Gyaros 2	Diplodus vulgaris	5	14	4.2
2016-10-13	24.7076	37.5934	Gyaros	Gyaros 2	Diplodus vulgaris	3	12	3.1
2016-10-13	24.7076	37.5934	Gyaros	Gyaros 2	Oblada melanura	15	16	2.9
2016-10-13	24.7076	37.5934	Gyaros	Gyaros 2	Sparisoma cretense	6	10	4.2
2016-10-13	24.7076	37.5934	Gyaros	Gyaros 2	Sparisoma cretense	10	12	1.6
2016-10-13	24.7076	37.5934	Gyaros	Gyaros 2	Sparisoma cretense	5	8	1.3
2016-10-13	24.7076	37.5934	Gyaros	Gyaros 2	Sparisoma cretense	4	17	3.3
2016-10-13	24.7076	37.5934	Gyaros	Gyaros 2	Siganus luridus	5	15	2.4
2016-10-13	24.7076	37.5934	Gyaros	Gyaros 2	Siganus luridus	3	12	3.1
2016-10-13	24.7076	37.5934	Gyaros	Gyaros 2	Siganus luridus	13	18	1.1
2016-10-13	24.7076	37.5934	Gyaros	Gyaros 2	Siganus luridus	8	14	0.3
2016-10-13	24.7076	37.5934	Gyaros	Gyaros 2	Siganus luridus	6	9	1.4
2016-10-13	24.7076	37.5934	Gyaros	Gyaros 2	Diplodus annularis	1	8	2.3
2016-10-13	24.7076	37.5934	Gyaros	Gyaros 2	Diplodus sargus	3	12	2.1
2016-10-13	24.7076	37.5934	Gyaros	Gyaros 2	Diplodus sargus	4	13	2.7
2016-10-13	24.7076	37.5934	Gyaros	Gyaros 2	Diplodus vulgaris	2	14	3.1
2016-10-13	24.7076	37.5934	Gyaros	Gyaros 2	Diplodus vulgaris	24	12	2.7
2016-10-13	24.7076	37.5934	Gyaros	Gyaros 2	Diplodus vulgaris	4	13	1.5
2016-10-13	24.7076	37.5934	Gyaros	Gyaros 2	Epinephelus costae	1	16	1.9
2016-10-13	24.7076	37.5934	Gyaros	Gyaros 2	Epinephelus marginatus	1	11	1.2
2016-10-13	24.7076	37.5934	Gyaros	Gyaros 2	Epinephelus marginatus	1	17	1.1
2016-10-13	24.7076	37.5934	Gyaros	Gyaros 2	Oblada melanura	5	8	1.2
[truncated: 927 more rows]
[truncated: 10 more columns]

## Sheet: Plot sampling
Date	Lat	Lon	Site/Location	Marine Area	Species	Cluster size	Average fish length (cm)
2016-07-27	26.1677	39.0048	Lesvos	Ag. Fokas	Diplodus sargus	2	6
2016-07-27	26.1677	39.0048	Lesvos	Ag. Fokas	Diplodus sargus	1	9
2016-07-27	26.1677	39.0048	Lesvos	Ag. Fokas	Diplodus vulgaris	4	8
2016-07-27	26.1677	39.0048	Lesvos	Ag. Fokas	Diplodus vulgaris	6	5
2016-07-27	26.1677	39.0048	Lesvos	Ag. Fokas	Diplodus vulgaris	1	10
2016-07-27	26.1677	39.0048	Lesvos	Ag. Fokas	Oblada melanura	8	10
2016-07-27	26.1677	39.0048	Lesvos	Ag. Fokas	Serranus scriba	1	10
2016-07-27	26.1677	39.0048	Lesvos	Ag. Fokas	Sarpa salpa	5	14
2016-07-27	26.1677	39.0048	Lesvos	Ag. Fokas	Sarpa salpa	2	12
2016-07-27	26.1677	39.0048	Lesvos	Ag. Fokas	Sparisoma cretense	1	14
2016-07-27	26.1677	39.0048	Lesvos	Ag. Fokas	Sparisoma cretense	2	11
2016-07-27	26.1677	39.0048	Lesvos	Ag. Fokas	Sparisoma cretense	1	16
2016-07-27	26.1677	39.0048	Lesvos	Ag. Fokas	Diplodus vulgaris	3	8
2016-07-27	26.1677	39.0048	Lesvos	Ag. Fokas	Oblada melanura	1	8
2016-07-27	26.1677	39.0048	Lesvos	Ag. Fokas	Sarpa salpa	1	13
2016-07-27	26.1677	39.0048	Lesvos	Ag. Fokas	Sarpa salpa	8	10
2016-07-27	26.1677	39.0048	Lesvos	Ag. Fokas	Sarpa salpa	2	14
2016-07-27	26.1677	39.0048	Lesvos	Ag. Fokas	Sparisoma cretense	4	13
2016-07-27	26.1677	39.0048	Lesvos	Ag. Fokas	Sparisoma cretense	1	20
2016-07-27	26.1677	39.0048	Lesvos	Ag. Fokas	Diplodus annularis	1	10
2016-07-27	26.1677	39.0048	Lesvos	Ag. Fokas	Diplodus annularis	2	11
2016-07-27	26.1677	39.0048	Lesvos	Ag. Fokas	Diplodus annularis	1	8
2016-07-27	26.1677	39.0048	Lesvos	Ag. Fokas	Diplodus annularis	3	8
2016-07-27	26.1677	39.0048	Lesvos	Ag. Fokas	Diplodus annularis	1	10
2016-07-27	26.1677	39.0048	Lesvos	Ag. Fokas	Mullus surmuletus	2	7
2016-07-27	26.1677	39.0048	Lesvos	Ag. Fokas	Serranus scriba	1	9
2016-07-27	26.1677	39.0048	Lesvos	Ag. Fokas	Serranus scriba	1	12
2016-07-27	26.1677	39.0048	Lesvos	Ag. Fokas	Serranus scriba	1	11
2016-07-27	26.1677	39.0048	Lesvos	Ag. Fokas	Sarpa salpa	1	11
2016-07-27	26.1677	39.0048	Lesvos	Ag. Fokas	Sparisoma cretense	8	13
2016-07-27	26.1677	39.0048	Lesvos	Ag. Fokas	Sparisoma cretense	1	19
2016-07-27	26.1677	39.0048	Lesvos	Ag. Fokas	Diplodus sargus	2	14
2016-07-27	26.1677	39.0048	Lesvos	Ag. Fokas	Oblada melanura	30	8
2016-07-27	26.1677	39.0048	Lesvos	Ag. Fokas	Serranus cabrila	1	7
2016-07-27	26.1677	39.0048	Lesvos	Ag. Fokas	Spariosoma cretense	1	13
2016-07-27	26.1677	39.0048	Lesvos	Ag. Fokas	Diplodus sargus	4	13
2016-07-27	26.1677	39.0048	Lesvos	Ag. Fokas	Diplodus vulgaris	6	12
2016-07-27	26.1677	39.0048	Lesvos	Ag. Fokas	Diplodus vulgaris	6	10
2016-07-27	26.1677	39.0048	Lesvos	Ag. Fokas	Oblada melanura	50-100	7
2016-07-27	26.1677	39.0048	Lesvos	Ag. Fokas	Oblada melanura	5	10
2016-07-27	26.1677	39.0048	Lesvos	Ag. Fokas	Serranus cabrila	1	8
2016-07-27	26.1677	39.0048	Lesvos	Ag. Fokas	Serranus cabrila	1	6
2016-07-27	26.1677	39.0048	Lesvos	Ag. Fokas	Serranus scriba	1	11
2016-07-27	26.1677	39.0048	Lesvos	Ag. Fokas	Serranus scriba	1	8
2016-07-27	26.1677	39.0048	Lesvos	Ag. Fokas	Serranus scriba	1	15
2016-07-27	26.1677	39.0048	Lesvos	Ag. Fokas	Serranus scriba	1	17
2016-07-27	26.1677	39.0048	Lesvos	Ag. Fokas	Mullus surmuletus	7	6
2016-07-27	26.1677	39.0048	Lesvos	Ag. Fokas	Mullus surmuletus	2	5
2016-07-27	26.1677	39.0048	Lesvos	Ag. Fokas	Serranus cabrila	1	9
2016-07-27	26.1677	39.0048	Lesvos	Ag. Fokas	Serranus scriba	1	11
2016-07-27	26.1677	39.0048	Lesvos	Ag. Fokas	Spariosoma cretense	2	13
2016-07-27	26.1677	39.0048	Lesvos	Ag. Fokas	Spariosoma cretense	5	10
2016-07-28	26.543	38.9978	Lesvos	Villa	Diplodus sargus	1	12
2016-07-28	26.543	38.9978	Lesvos	Villa	Diplodus sargus	2	10
2016-07-28	26.543	38.9978	Lesvos	Villa	Diplodus sargus	1	11
2016-07-28	26.543	38.9978	Lesvos	Villa	Diplodus vulgaris	1	8
2016-07-28	26.543	38.9978	Lesvos	Villa	Diplodus vulgaris	1	5
2016-07-28	26.543	38.9978	Lesvos	Villa	Diplodus vulgaris	1	6
2016-07-28	26.543	38.9978	Lesvos	Villa	Sarpa salpa	8	12
2016-07-28	26.543	38.9978	Lesvos	Villa	Diplodus sargus	1	12
2016-07-28	26.543	38.9978	Lesvos	Villa	Diplodus sargus	2	10
2016-07-28	26.543	38.9978	Lesvos	Villa	Diplodus vulgaris	3	7
2016-07-28	26.543	38.9978	Lesvos	Villa	Diplodus vulgaris	1	5
2016-07-28	26.543	38.9978	Lesvos	Villa	Diplodus puntazo	1	11
2016-07-28	26.543	38.9978	Lesvos	Villa	Mullus surmuletus	1	7
2016-07-28	26.543	38.9978	Lesvos	Villa	Sarpa salpa	1	12
2016-07-28	26.543	38.9978	Lesvos	Villa	Diplodus annularis	1	9
2016-07-28	26.543	38.9978	Lesvos	Villa	Diplodus sargus	1	11
2016-07-28	26.543	38.9978	Lesvos	Villa	Diplodus sargus	1	12
2016-07-28	26.543	38.9978	Lesvos	Villa	Diplodus vulgaris	2	6
2016-07-28	26.543	38.9978	Lesvos	Villa	Diplodus vulgaris	5	10
2016-07-28	26.543	38.9978	Lesvos	Villa	Diplodus vulgaris	1	5
2016-07-28	26.543	38.9978	Lesvos	Villa	Diplodus vulgaris	16	8
2016-07-28	26.543	38.9978	Lesvos	Villa	Serranus scriba	2	9
2016-07-28	26.543	38.9978	Lesvos	Villa	Sarpa salpa	5	13
2016-07-28	26.543	38.9978	Lesvos	Villa	Sarpa salpa	3	12
2016-07-28	26.543	38.9978	Lesvos	Villa	Diplodus vulgaris	3	7
2016-07-28	26.543	38.9978	Lesvos	Villa	Diplodus vulgaris	8	8
2016-07-28	26.543	38.9978	Lesvos	Villa	Diplodus vulgaris	1	5
2016-07-28	26.543	38.9978	Lesvos	Villa	Oblada melanura	10	12
2016-07-28	26.543	38.9978	Lesvos	Villa	Mullus surmuletus	4	7
2016-07-28	26.543	38.9978	Lesvos	Villa	Mullus surmuletus	1	6
2016-07-28	26.543	38.9978	Lesvos	Villa	Serranus cabrila	2	8
2016-07-28	26.543	38.9978	Lesvos	Villa	Sarpa salpa	3	14
2016-07-28	26.543	38.9978	Lesvos	Villa	Sarpa salpa	1	11
2016-07-28	26.543	38.9978	Lesvos	Villa	Spariosoma cretense	3	13
2016-07-28	26.543	38.9978	Lesvos	Villa	Spariosoma cretense	1	12
2016-07-28	26.543	38.9978	Lesvos	Villa	Diplodus vulgaris	3	10
2016-07-28	26.543	38.9978	Lesvos	Villa	Diplodus vulgaris	5	8
2016-07-28	26.543	38.9978	Lesvos	Villa	Diplodus puntazo	1	11
2016-07-28	26.543	38.9978	Lesvos	Villa	Mullus surmuletus	7	8
2016-07-28	26.543	38.9978	Lesvos	Villa	Serranus cabrila	2	9
2016-07-28	26.543	38.9978	Lesvos	Villa	Spariosoma cretense	3	11
2016-07-28	26.543	38.9978	Lesvos	Villa	Diplodus annularis	3	8
2016-07-28	26.543	38.9978	Lesvos	Villa	Diplodus vulgaris	3	8
2016-07-28	26.543	38.9978	Lesvos	Villa	Diplodus vulgaris	2	11
2016-07-28	26.543	38.9978	Lesvos	Villa	Oblada melanura	14	8
2016-07-28	26.543	38.9978	Lesvos	Villa	Mullus surmuletus	1	12
2016-07-28	26.543	38.9978	Lesvos	Villa	Sarpa salpa	4	14
2016-07-28	26.543	38.9978	Lesvos	Villa	Sarpa salpa	1	10
2016-07-28	26.543	38.9978	Lesvos	Villa	Spariosoma cretense	2	12
2016-07-28	26.543	38.9978	Lesvos	Villa	Spariosoma cretense	1	14
2016-07-28	26.543	38.9978	Lesvos	Villa	Spondyliosoma cantharus	1	12
2016-09-11	23.116	39.087	Pelion	Nero	Diplodus annularis	1	4
2016-09-11	23.116	39.087	Pelion	Nero	Diplodus annularis	6	5
2016-09-11	23.116	39.087	Pelion	Nero	Diplodus vulgaris	1	14
2016-09-11	23.116	39.087	Pelion	Nero	Diplodus vulgaris	4	5
2016-09-11	23.116	39.087	Pelion	Nero	Diplodus vulgaris	3	8
2016-09-11	23.116	39.087	Pelion	Nero	Diplodus puntazzo	1	10
2016-09-11	23.116	39.087	Pelion	Nero	Diplodus puntazzo	1	9
2016-09-11	23.116	39.087	Pelion	Nero	Serranus scriba	2	9
2016-09-11	23.116	39.087	Pelion	Nero	Sarpa salpa	5	11
2016-09-11	23.116	39.087	Pelion	Nero	Sarpa salpa	2	14
2016-09-11	23.116	39.087	Pelion	Nero	Sarpa salpa	6	8
2016-09-11	23.116	39.087	Pelion	Nero	Diplodus annularis	2	6
2016-09-11	23.116	39.087	Pelion	Nero	Diplodus sargus	1	6
2016-09-11	23.116	39.087	Pelion	Nero	Diplodus vulgaris	1	7
2016-09-11	23.116	39.087	Pelion	Nero	Diplodus vulgaris	3	5
2016-09-11	23.116	39.087	Pelion	Nero	Diplodus puntazzo	1	12
2016-09-11	23.116	39.087	Pelion	Nero	Serranus scriba	2	9
2016-09-11	23.116	39.087	Pelion	Nero	Serranus scriba	1	13
2016-09-11	23.116	39.087	Pelion	Nero	Serranus scriba	1	8
2016-09-11	23.116	39.087	Pelion	Nero	Sarpa salpa	2	12
2016-09-11	23.116	39.087	Pelion	Nero	Diplodus annularis	1	4
2016-09-11	23.116	39.087	Pelion	Nero	Diplodus annularis	4	5
2016-09-11	23.116	39.087	Pelion	Nero	Diplodus vulgaris	2	6
2016-09-11	23.116	39.087	Pelion	Nero	Diplodus vulgaris	1	7
2016-09-11	23.116	39.087	Pelion	Nero	Diplodus vulgaris	3	5
2016-09-11	23.116	39.087	Pelion	Nero	Diplodus puntazzo	1	9
2016-09-11	23.116	39.087	Pelion	Nero	Oblada melanura	2	6
2016-09-11	23.116	39.087	Pelion	Nero	Serranus scriba	1	12
2016-09-11	23.116	39.087	Pelion	Nero	Serranus scriba	2	8
2016-09-11	23.116	39.087	Pelion	Nero	Serranus scriba	1	11
2016-09-11	23.116	39.087	Pelion	Nero	Serranus scriba	1	13
2016-09-11	23.116	39.087	Pelion	Nero	Spondyliosoma cantharus	1	5
2016-09-11	23.116	39.087	Pelion	Nero	Diplodus vulgaris	3	12
2016-09-11	23.116	39.087	Pelion	Nero	Diplodus vulgaris	4	11
2016-09-11	23.116	39.087	Pelion	Nero	Serranus scriba	1	8
2016-09-11	23.116	39.087	Pelion	Nero	Serranus scriba	1	13
2016-09-11	23.116	39.087	Pelion	Nero	Diplodus annularis	1	4
2016-09-11	23.116	39.087	Pelion	Nero	Diplodus annularis	2	6
2016-09-11	23.116	39.087	Pelion	Nero	Diplodus vulgaris	1	10
2016-09-11	23.116	39.087	Pelion	Nero	Diplodus vulgaris	3	12
2016-09-11	23.116	39.087	Pelion	Nero	Diplodus vulgaris	1	14
2016-09-11	23.116	39.087	Pelion	Nero	Mullus surmuletus	1	14
2016-09-11	23.116	39.087	Pelion	Nero	Serranus scriba	1	12
2016-09-11	23.116	39.087	Pelion	Nero	Serranus scriba	2	8
2016-09-11	23.116	39.087	Pelion	Nero	Serranus scriba	1	7
2016-09-11	23.116	39.087	Pelion	Nero	Spondyliosoma cantharus	1	7
2016-09-11	23.116	39.087	Pelion	Nero	Spondyliosoma cantharus	4	6
2016-09-11	23.116	39.087	Pelion	Nero	Diplodus annularis	1	6
2016-09-11	23.116	39.087	Pelion	Nero	Diplodus annularis	1	11
2016-09-11	23.116	39.087	Pelion	Nero	Diplodus vulgaris	2	7
2016-09-11	23.116	39.087	Pelion	Nero	Diplodus vulgaris	1	11
2016-09-11	23.116	39.087	Pelion	Nero	Diplodus puntazzo	1	8
2016-09-11	23.116	39.087	Pelion	Nero	Serranus scriba	1	13
2016-09-11	23.116	39.087	Pelion	Nero	Serranus scriba	2	10
2016-09-11	23.116	39.087	Pelion	Nero	Serranus scriba	1	8
2016-09-11	23.116	39.087	Pelion	Nero	Serranus scriba	1	11
2016-09-11	23.0573	39.0952	Pelion	Geroplina	Diplodus vulgaris	4	11
2016-09-11	23.0573	39.0952	Pelion	Geroplina	Diplodus vulgaris	5	9
2016-09-11	23.0573	39.0952	Pelion	Geroplina	Diplodus vulgaris	1	13
2016-09-11	23.0573	39.0952	Pelion	Geroplina	Oblada melanura	20	7
2016-09-11	23.0573	39.0952	Pelion	Geroplina	Diplodus vulgaris	2	6
2016-09-11	23.0573	39.0952	Pelion	Geroplina	Diplodus vulgaris	1	11
2016-09-11	23.0573	39.0952	Pelion	Geroplina	Serranus scriba	1	5
2016-09-11	23.0573	39.0952	Pelion	Geroplina	Serranus scriba	1	6
2016-09-11	23.0573	39.0952	Pelion	Geroplina	Serranus scriba	2	7
2016-09-11	23.0573	39.0952	Pelion	Geroplina	Diplodus vulgaris	1	8
2016-09-11	23.0573	39.0952	Pelion	Geroplina	Diplodus vulgaris	1	10
2016-09-11	23.0573	39.0952	Pelion	Geroplina	Diplodus vulgaris	1	7
2016-09-11	23.0573	39.0952	Pelion	Geroplina	Diplodus puntazzo	1	10
2016-09-11	23.0573	39.0952	Pelion	Geroplina	Diplodus puntazzo	5	11
2016-09-11	23.0573	39.0952	Pelion	Geroplina	Serranus scriba	1	13
2016-09-11	23.0573	39.0952	Pelion	Geroplina	Sarpa salpa	6	7
2016-09-11	23.0573	39.0952	Pelion	Geroplina	Diplodus vulgaris	2	13
2016-09-11	23.0573	39.0952	Pelion	Geroplina	Diplodus vulgaris	2	12
2016-09-11	23.0573	39.0952	Pelion	Geroplina	Diplodus sargus	1	14
2016-09-11	23.0573	39.0952	Pelion	Geroplina	Diplodus sargus	4	13
2016-09-11	23.0573	39.0952	Pelion	Geroplina	Serranus scriba	2	12
2016-09-11	23.0573	39.0952	Pelion	Geroplina	Serranus scriba	1	10
2016-09-11	23.0573	39.0952	Pelion	Geroplina	Diplodus vulgaris	2	13
2016-09-11	23.0573	39.0952	Pelion	Geroplina	Diplodus vulgaris	5	14
2016-09-11	23.0573	39.0952	Pelion	Geroplina	Serranus scriba	2	5
2016-09-11	23.0573	39.0952	Pelion	Geroplina	Serranus scriba	3	10
2016-09-11	23.0573	39.0952	Pelion	Geroplina	Serranus scriba	1	8
2016-09-11	23.0573	39.0952	Pelion	Geroplina	Diplodus vulgaris	1	10
2016-09-11	23.0573	39.0952	Pelion	Geroplina	Mullus surmuletus	1	13
2016-09-11	23.0573	39.0952	Pelion	Geroplina	Mullus surmuletus	3	11
2016-09-11	23.0573	39.0952	Pelion	Geroplina	Serranus scriba	1	12
2016-09-11	23.0573	39.0952	Pelion	Geroplina	Spondyliosoma cantharus	1	7
2016-09-11	23.0573	39.0952	Pelion	Geroplina	Spondyliosoma cantharus	1	8
2016-09-12	23.0684	39.1287	Pelion	Bora	Serranus scriba	1	7
2016-09-12	23.0684	39.1287	Pelion	Bora	Serranus scriba	3	6
2016-09-12	23.0684	39.1287	Pelion	Bora	Diplodus vulgaris	3	6
2016-09-12	23.0684	39.1287	Pelion	Bora	Diplodus vulgaris	1	13
2016-09-12	23.0684	39.1287	Pelion	Bora	Serranus scriba	3	12
2016-09-12	23.0684	39.1287	Pelion	Bora	Serranus scriba	1	10
2016-09-12	23.0684	39.1287	Pelion	Bora	Diplodus vulgaris	1	8
2016-09-12	23.0684	39.1287	Pelion	Bora	Diplodus vulgaris	3	9
2016-09-12	23.0684	39.1287	Pelion	Bora	Serranus scriba	1	15
2016-09-12	23.0684	39.1287	Pelion	Bora	Diplodus vulgaris	5	5
2016-09-12	23.0684	39.1287	Pelion	Bora	Serranus scriba	3	11
2016-09-12	23.0684	39.1287	Pelion	Bora	Serranus scriba	4	10
2016-09-12	23.0684	39.1287	Pelion	Bora	Serranus scriba	1	13
2016-09-12	23.0684	39.1287	Pelion	Bora	Serranus scriba	1	12
2016-09-12	23.0684	39.1287	Pelion	Bora	Serranus scriba	1	8
2016-09-12	23.0684	39.1287	Pelion	Bora	Serranus scriba	3	11
2016-09-12	23.0684	39.1287	Pelion	Bora	Diplodus vulgaris	2	7
2016-09-12	23.0684	39.1287	Pelion	Bora	Serranus scriba	2	10
2016-09-12	23.0684	39.1287	Pelion	Bora	Serranus scriba	3	12
2016-09-12	23.0684	39.1287	Pelion	Bora	Serranus scriba	2	9
2016-09-12	23.0505	39.0979	Pelion	Faros	Diplodus vulgaris	1	11
2016-09-12	23.0505	39.0979	Pelion	Faros	Serranus scriba	3	12
2016-09-12	23.0505	39.0979	Pelion	Faros	Serranus scriba	6	10
2016-09-12	23.0505	39.0979	Pelion	Faros	Serranus scriba	4	6
2016-09-12	23.0505	39.0979	Pelion	Faros	Diplodus vulgaris	3	10
2016-09-12	23.0505	39.0979	Pelion	Faros	Diplodus vulgaris	2	12
2016-09-12	23.0505	39.0979	Pelion	Faros	Serranus scriba	3	12
2016-09-12	23.0505	39.0979	Pelion	Faros	Serranus scriba	1	5
2016-09-12	23.0505	39.0979	Pelion	Faros	Serranus scriba	3	6
2016-09-12	23.0505	39.0979	Pelion	Faros	Serranus scriba	3	11
2016-09-12	23.0505	39.0979	Pelion	Faros	Diplodus vulgaris	1	12
2016-09-12	23.0505	39.0979	Pelion	Faros	Diplodus vulgaris	1	8
2016-09-12	23.0505	39.0979	Pelion	Faros	Oblada melanura	20	9
2016-09-12	23.0505	39.0979	Pelion	Faros	Mullus surmuletus	1	12
2016-09-12	23.0505	39.0979	Pelion	Faros	Mullus surmuletus	5	13
2016-09-12	23.0505	39.0979	Pelion	Faros	Serranus scriba	1	5
2016-09-12	23.0505	39.0979	Pelion	Faros	Serranus scriba	2	12
2016-09-12	23.0505	39.0979	Pelion	Faros	Serranus scriba	1	7
2016-09-12	23.0505	39.0979	Pelion	Faros	Diplodus sargus	2	12
2016-09-12	23.0505	39.0979	Pelion	Faros	Diplodus vulgaris	8	9
2016-09-12	23.0505	39.0979	Pelion	Faros	Serranus scriba	1	13
2016-09-12	23.0505	39.0979	Pelion	Faros	Serranus scriba	2	12
2016-09-12	23.0505	39.0979	Pelion	Faros	Spondyliosoma cantharus	7	7
2016-09-12	23.0505	39.0979	Pelion	Faros	Diplodus annularis	1	8
2016-09-12	23.0505	39.0979	Pelion	Faros	Diplodus vulgaris	1	13
2016-09-12	23.0505	39.0979	Pelion	Faros	Diplodus vulgaris	3	9
2016-09-12	23.0505	39.0979	Pelion	Faros	Diplodus vulgaris	3	6
2016-09-12	23.0505	39.0979	Pelion	Faros	Diplodus sargus	1	14
2016-09-12	23.0505	39.0979	Pelion	Faros	Mullus surmuletus	1	13
2016-09-12	23.0505	39.0979	Pelion	Faros	Serranus scriba	1	12
2016-09-12	23.0505	39.0979	Pelion	Faros	Serranus scriba	2	10
2016-09-12	23.0505	39.0979	Pelion	Faros	Spondyliosoma cantharus	8	7
2016-09-12	23.0505	39.0979	Pelion	Faros	Spondyliosoma cantharus	4	8
2016-09-12	23.0505	39.0979	Pelion	Faros	Diplodus vulgaris	1	8
2016-09-12	23.0505	39.0979	Pelion	Faros	Diplodus vulgaris	1	13
2016-09-12	23.0505	39.0979	Pelion	Faros	Mullus surmuletus	4	12
2016-09-12	23.0505	39.0979	Pelion	Faros	Serranus scriba	1	13
2016-09-12	23.0505	39.0979	Pelion	Faros	Spondyliosoma cantharus	3	8
2016-09-14	23.7136	40.1755	Chalkidiki	Akti Kalogrias	Diplodus annularis	1	5
2016-09-14	23.7136	40.1755	Chalkidiki	Akti Kalogrias	Diplodus annularis	5	11
2016-09-14	23.7136	40.1755	Chalkidiki	Akti Kalogrias	Diplodus sargus	2	12
2016-09-14	23.7136	40.1755	Chalkidiki	Akti Kalogrias	Diplodus vulgaris	4	12
2016-09-14	23.7136	40.1755	Chalkidiki	Akti Kalogrias	Diplodus vulgaris	8	10
2016-09-14	23.7136	40.1755	Chalkidiki	Akti Kalogrias	Diplodus vulgaris	7	15
2016-09-14	23.7136	40.1755	Chalkidiki	Akti Kalogrias	Diplodus vulgaris	8	13
2016-09-14	23.7136	40.1755	Chalkidiki	Akti Kalogrias	Diplodus puntazzo	1	14
2016-09-14	23.7136	40.1755	Chalkidiki	Akti Kalogrias	Diplodus puntazzo	1	25
2016-09-14	23.7136	40.1755	Chalkidiki	Akti Kalogrias	Serranus scriba	4	12
2016-09-14	23.7136	40.1755	Chalkidiki	Akti Kalogrias	Serranus scriba	1	13
2016-09-14	23.7136	40.1755	Chalkidiki	Akti Kalogrias	Sarpa salpa	35	14
2016-09-14	23.7136	40.1755	Chalkidiki	Akti Kalogrias	Sarpa salpa	20	15
2016-09-14	23.7136	40.1755	Chalkidiki	Akti Kalogrias	Diplodus annularis	4	6
2016-09-14	23.7136	40.1755	Chalkidiki	Akti Kalogrias	Diplodus annularis	1	5
2016-09-14	23.7136	40.1755	Chalkidiki	Akti Kalogrias	Diplodus annularis	2	11
2016-09-14	23.7136	40.1755	Chalkidiki	Akti Kalogrias	Diplodus vulgaris	3	9
2016-09-14	23.7136	40.1755	Chalkidiki	Akti Kalogrias	Diplodus vulgaris	1	12
2016-09-14	23.7136	40.1755	Chalkidiki	Akti Kalogrias	Diplodus vulgaris	1	14
2016-09-14	23.7136	40.1755	Chalkidiki	Akti Kalogrias	Diplodus vulgaris	3	8
2016-09-14	23.7136	40.1755	Chalkidiki	Akti Kalogrias	Diplodus puntazzo	1	7
2016-09-14	23.7136	40.1755	Chalkidiki	Akti Kalogrias	Diplodus puntazzo	1	13
2016-09-14	23.7136	40.1755	Chalkidiki	Akti Kalogrias	Serranus scriba	1	15
2016-09-14	23.7136	40.1755	Chalkidiki	Akti Kalogrias	Serranus scriba	1	13
2016-09-14	23.7136	40.1755	Chalkidiki	Akti Kalogrias	Serranus scriba	3	12
2016-09-14	23.7136	40.1755	Chalkidiki	Akti Kalogrias	Serranus scriba	5	10
2016-09-14	23.7136	40.1755	Chalkidiki	Akti Kalogrias	Epinephelus costae	1	15
2016-09-14	23.7136	40.1755	Chalkidiki	Akti Kalogrias	Diplodus annularis	1	8
2016-09-14	23.7136	40.1755	Chalkidiki	Akti Kalogrias	Diplodus vulgaris	1	17
2016-09-14	23.7136	40.1755	Chalkidiki	Akti Kalogrias	Diplodus vulgaris	5	8
2016-09-14	23.7136	40.1755	Chalkidiki	Akti Kalogrias	Diplodus vulgaris	8	15
2016-09-14	23.7136	40.1755	Chalkidiki	Akti Kalogrias	Diplodus puntazzo	1	18
2016-09-14	23.7136	40.1755	Chalkidiki	Akti Kalogrias	Mullus surmuletus	1	11
2016-09-14	23.7136	40.1755	Chalkidiki	Akti Kalogrias	Serranus scriba	4	10
2016-09-14	23.7136	40.1755	Chalkidiki	Akti Kalogrias	Serranus scriba	3	12
2016-09-14	23.7136	40.1755	Chalkidiki	Akti Kalogrias	Serranus scriba	5	11
2016-09-14	23.7136	40.1755	Chalkidiki	Akti Kalogrias	Sarpa salpa	3	10
2016-09-14	23.7136	40.1755	Chalkidiki	Akti Kalogrias	Sarpa salpa	3	9
2016-09-14	23.7136	40.1755	Chalkidiki	Akti Kalogrias	Epinephelus costae	3	8
2016-09-14	23.7136	40.1755	Chalkidiki	Akti Kalogrias	Epinephelus costae	2	10
2016-09-14	23.7136	40.1755	Chalkidiki	Akti Kalogrias	Epinephelus marginatus	1	10
2016-09-14	23.7136	40.1755	Chalkidiki	Akti Kalogrias	Diplodus sargus	1	15
2016-09-14	23.7136	40.1755	Chalkidiki	Akti Kalogrias	Diplodus vulgaris	1	17
2016-09-14	23.7136	40.1755	Chalkidiki	Akti Kalogrias	Diplodus vulgaris	1	13
2016-09-14	23.7136	40.1755	Chalkidiki	Akti Kalogrias	Diplodus vulgaris	3	9
2016-09-14	23.7136	40.1755	Chalkidiki	Akti Kalogrias	Diplodus puntazzo	1	14
2016-09-14	23.7136	40.1755	Chalkidiki	Akti Kalogrias	Mullus surmuletus	1	12
2016-09-14	23.7136	40.1755	Chalkidiki	Akti Kalogrias	Serranus scriba	1	13
2016-09-14	23.7136	40.1755	Chalkidiki	Akti Kalogrias	Serranus scriba	1	9
2016-09-14	23.7136	40.1755	Chalkidiki	Akti Kalogrias	Epinephelus costae	1	20
2016-09-14	23.7136	40.1755	Chalkidiki	Akti Kalogrias	Epinephelus costae	1	18
2016-09-14	23.7136	40.1755	Chalkidiki	Akti Kalogrias	Diplodus sargus	1	15
2016-09-14	23.7136	40.1755	Chalkidiki	Akti Kalogrias	Diplodus vulgaris	2	20
2016-09-14	23.7136	40.1755	Chalkidiki	Akti Kalogrias	Diplodus vulgaris	3	14
2016-09-14	23.7136	40.1755	Chalkidiki	Akti Kalogrias	Diplodus vulgaris	3	8
2016-09-14	23.7136	40.1755	Chalkidiki	Akti Kalogrias	Diplodus puntazzo	1	19
2016-09-14	23.7136	40.1755	Chalkidiki	Akti Kalogrias	Diplodus puntazzo	1	10
2016-09-14	23.7136	40.1755	Chalkidiki	Akti Kalogrias	Oblada melanura	15	12
2016-09-14	23.7136	40.1755	Chalkidiki	Akti Kalogrias	Mullus surmuletus	1	13
2016-09-14	23.7136	40.1755	Chalkidiki	Akti Kalogrias	Serranus scriba	1	9
2016-09-14	23.7136	40.1755	Chalkidiki	Akti Kalogrias	Serranus scriba	6	13
2016-09-14	23.7136	40.1755	Chalkidiki	Akti Kalogrias	Serranus scriba	3	12
2016-09-14	23.7136	40.1755	Chalkidiki	Akti Kalogrias	Sarpa salpa	3	10
2016-09-14	23.7136	40.1755	Chalkidiki	Akti Kalogrias	Sarpa salpa	15	15
2016-09-14	23.7136	40.1755	Chalkidiki	Akti Kalogrias	Epinephelus costae	1	20
2016-09-14	23.7136	40.1755	Chalkidiki	Akti Kalogrias	Epinephelus costae	1	15
2016-09-14	23.7136	40.1755	Chalkidiki	Akti Kalogrias	Dentex dentex	1	14
2016-09-14	23.7136	40.1755	Chalkidiki	Akti Kalogrias	Diplodus vulgaris	1	16
2016-09-14	23.7136	40.1755	Chalkidiki	Akti Kalogrias	Diplodus vulgaris	1	15
2016-09-14	23.7136	40.1755	Chalkidiki	Akti Kalogrias	Diplodus vulgaris	1	8
2016-09-14	23.7136	40.1755	Chalkidiki	Akti Kalogrias	Diplodus puntazzo	1	15
2016-09-14	23.7136	40.1755	Chalkidiki	Akti Kalogrias	Diplodus puntazzo	1	22
2016-09-14	23.7136	40.1755	Chalkidiki	Akti Kalogrias	Mullus surmuletus	2	12
2016-09-14	23.7136	40.1755	Chalkidiki	Akti Kalogrias	Serranus scriba	3	14
2016-09-14	23.7136	40.1755	Chalkidiki	Akti Kalogrias	Serranus scriba	2	11
2016-09-14	23.7136	40.1755	Chalkidiki	Akti Kalogrias	Sarpa salpa	6	10
2016-09-14	23.7136	40.1755	Chalkidiki	Akti Kalogrias	Epinephelus costae	1	21
2016-09-14	23.7136	40.1755	Chalkidiki	Akti Kalogrias	Epinephelus costae	1	16
2016-09-14	23.7136	40.1755	Chalkidiki	Akti Kalogrias	Dentex dentex	1	12
2016-09-15	23.8998	39.9625	Chalkidiki	Peristeronisi	Diplodus annularis	1	12
2016-09-15	23.8998	39.9625	Chalkidiki	Peristeronisi	Diplodus annularis	3	11
2016-09-15	23.8998	39.9625	Chalkidiki	Peristeronisi	Diplodus annularis	4	10
2016-09-15	23.8998	39.9625	Chalkidiki	Peristeronisi	Diplodus vulgaris	5	13
2016-09-15	23.8998	39.9625	Chalkidiki	Peristeronisi	Diplodus vulgaris	10	10
2016-09-15	23.8998	39.9625	Chalkidiki	Peristeronisi	Diplodus vulgaris	1	14
2016-09-15	23.8998	39.9625	Chalkidiki	Peristeronisi	Diplodus puntazzo	1	13
2016-09-15	23.8998	39.9625	Chalkidiki	Peristeronisi	Diplodus puntazzo	2	12
2016-09-15	23.8998	39.9625	Chalkidiki	Peristeronisi	Oblada melanura	10	14
2016-09-15	23.8998	39.9625	Chalkidiki	Peristeronisi	Serranus scriba	1	13
2016-09-15	23.8998	39.9625	Chalkidiki	Peristeronisi	Serranus scriba	1	12
2016-09-15	23.8998	39.9625	Chalkidiki	Peristeronisi	Serranus scriba	1	8
2016-09-15	23.8998	39.9625	Chalkidiki	Peristeronisi	Serranus scriba	3	11
2016-09-15	23.8998	39.9625	Chalkidiki	Peristeronisi	Sparisoma cretense	1	13
2016-09-15	23.8998	39.9625	Chalkidiki	Peristeronisi	Diplodus annularis	1	10
2016-09-15	23.8998	39.9625	Chalkidiki	Peristeronisi	Diplodus annularis	3	7
2016-09-15	23.8998	39.9625	Chalkidiki	Peristeronisi	Diplodus annularis	1	11
2016-09-15	23.8998	39.9625	Chalkidiki	Peristeronisi	Diplodus vulgaris	4	6
2016-09-15	23.8998	39.9625	Chalkidiki	Peristeronisi	Diplodus vulgaris	1	13
2016-09-15	23.8998	39.9625	Chalkidiki	Peristeronisi	Mullus surmuletus	1	9
2016-09-15	23.8998	39.9625	Chalkidiki	Peristeronisi	Mullus surmuletus	1	11
2016-09-15	23.8998	39.9625	Chalkidiki	Peristeronisi	Mullus surmuletus	1	13
2016-09-15	23.8998	39.9625	Chalkidiki	Peristeronisi	Serranus scriba	3	12
2016-09-15	23.8998	39.9625	Chalkidiki	Peristeronisi	Serranus scriba	2	10
2016-09-15	23.8998	39.9625	Chalkidiki	Peristeronisi	Sparisoma cretense	1	12
2016-09-15	23.8998	39.9625	Chalkidiki	Peristeronisi	Sparisoma cretense	2	15
2016-09-15	23.8998	39.9625	Chalkidiki	Peristeronisi	Diplodus annularis	17	9
2016-09-15	23.8998	39.9625	Chalkidiki	Peristeronisi	Diplodus annularis	1	11
2016-09-15	23.8998	39.9625	Chalkidiki	Peristeronisi	Diplodus sargus	1	7
2016-09-15	23.8998	39.9625	Chalkidiki	Peristeronisi	Diplodus vulgaris	1	7
2016-09-15	23.8998	39.9625	Chalkidiki	Peristeronisi	Diplodus vulgaris	4	10
2016-09-15	23.8998	39.9625	Chalkidiki	Peristeronisi	Diplodus vulgaris	3	9
2016-09-15	23.8998	39.9625	Chalkidiki	Peristeronisi	Diplodus vulgaris	1	12
2016-09-15	23.8998	39.9625	Chalkidiki	Peristeronisi	Diplodus vulgaris	1	6
2016-09-15	23.8998	39.9625	Chalkidiki	Peristeronisi	Oblada melanura	1	11
2016-09-15	23.8998	39.9625	Chalkidiki	Peristeronisi	Oblada melanura	1	10
2016-09-15	23.8998	39.9625	Chalkidiki	Peristeronisi	Serranus scriba	1	8
2016-09-15	23.8998	39.9625	Chalkidiki	Peristeronisi	Sarpa salpa	3	10
2016-09-15	23.8998	39.9625	Chalkidiki	Peristeronisi	Sarpa salpa	12	9
2016-09-15	23.8998	39.9625	Chalkidiki	Peristeronisi	Sarpa salpa	25	9
2016-09-15	23.8998	39.9625	Chalkidiki	Peristeronisi	Sparisoma cretense	1	12
2016-09-15	23.8998	39.9625	Chalkidiki	Peristeronisi	Spondyliosoma cantharus	1	15
2016-09-15	23.8998	39.9625	Chalkidiki	Peristeronisi	Diplodus annularis	3	10
2016-09-15	23.8998	39.9625	Chalkidiki	Peristeronisi	Diplodus annularis	5	11
2016-09-15	23.8998	39.9625	Chalkidiki	Peristeronisi	Diplodus vulgaris	1	11
2016-09-15	23.8998	39.9625	Chalkidiki	Peristeronisi	Diplodus puntazzo	1	12
2016-09-15	23.8998	39.9625	Chalkidiki	Peristeronisi	Oblada melanura	4	11
2016-09-15	23.8998	39.9625	Chalkidiki	Peristeronisi	Serranus scriba	7	12
2016-09-15	23.8998	39.9625	Chalkidiki	Peristeronisi	Serranus scriba	2	14
2016-09-15	23.8998	39.9625	Chalkidiki	Peristeronisi	Diplodus annularis	3	8
2016-09-15	23.8998	39.9625	Chalkidiki	Peristeronisi	Diplodus annularis	4	11
2016-09-15	23.8998	39.9625	Chalkidiki	Peristeronisi	Diplodus vulgaris	4	8
2016-09-15	23.8998	39.9625	Chalkidiki	Peristeronisi	Diplodus vulgaris	8	12
2016-09-15	23.8998	39.9625	Chalkidiki	Peristeronisi	Diplodus vulgaris	1	16
2016-09-15	23.8998	39.9625	Chalkidiki	Peristeronisi	Diplodus vulgaris	10	11
2016-09-15	23.8998	39.9625	Chalkidiki	Peristeronisi	Mullus surmuletus	1	13
2016-09-15	23.8998	39.9625	Chalkidiki	Peristeronisi	Serranus scriba	4	9
2016-09-15	23.8998	39.9625	Chalkidiki	Peristeronisi	Serranus scriba	2	14
2016-09-15	23.8998	39.9625	Chalkidiki	Peristeronisi	Serranus scriba	7	12
2016-09-15	23.8998	39.9625	Chalkidiki	Peristeronisi	Serranus scriba	1	15
2016-09-15	23.8998	39.9625	Chalkidiki	Peristeronisi	Sarpa salpa	3	13
2016-09-15	23.8998	39.9625	Chalkidiki	Peristeronisi	Sarpa salpa	4	14
2016-09-15	23.8998	39.9625	Chalkidiki	Peristeronisi	Diplodus annularis	2	9
2016-09-15	23.8998	39.9625	Chalkidiki	Peristeronisi	Diplodus annularis	3	11
2016-09-15	23.8998	39.9625	Chalkidiki	Peristeronisi	Diplodus vulgaris	1	12
2016-09-15	23.8998	39.9625	Chalkidiki	Peristeronisi	Diplodus vulgaris	3	11
2016-09-15	23.8998	39.9625	Chalkidiki	Peristeronisi	Diplodus vulgaris	2	13
2016-09-15	23.8998	39.9625	Chalkidiki	Peristeronisi	Mullus surmuletus	1	10
2016-09-15	23.8998	39.9625	Chalkidiki	Peristeronisi	Serranus scriba	4	10
2016-09-15	23.8998	39.9625	Chalkidiki	Peristeronisi	Serranus scriba	1	12
2016-09-15	23.8998	39.9625	Chalkidiki	Peristeronisi	Serranus scriba	1	8
2016-09-15	23.8998	39.9625	Chalkidiki	Peristeronisi	Serranus scriba	1	14
2016-09-15	23.8998	39.9625	Chalkidiki	Peristeronisi	Serranus scriba	1	15
2016-09-15	23.8998	39.9625	Chalkidiki	Peristeronisi	Sarpa salpa	5	14
2016-09-15	23.8998	39.9625	Chalkidiki	Peristeronisi	Sarpa salpa	15	9
2016-09-15	23.8998	39.9625	Chalkidiki	Peristeronisi	Sarpa salpa	8	13
2016-09-15	23.8998	39.9625	Chalkidiki	Peristeronisi	Sparisoma cretense	1	15
2016-09-15	23.8998	39.9625	Chalkidiki	Peristeronisi	Spondyliosoma cantharus	1	12
2016-09-15	23.8998	39.9625	Chalkidiki	Peristeronisi	Spondyliosoma cantharus	1	9
2016-09-16	23.9552	40.3069	Chalkidiki	Drenia	Diplodus annularis	1	10
2016-09-16	23.9552	40.3069	Chalkidiki	Drenia	Diplodus vulgaris	7	5
2016-09-16	23.9552	40.3069	Chalkidiki	Drenia	Diplodus vulgaris	1	13
2016-09-16	23.9552	40.3069	Chalkidiki	Drenia	Diplodus vulgaris	2	12
2016-09-16	23.9552	40.3069	Chalkidiki	Drenia	Diplodus vulgaris	3	11
2016-09-16	23.9552	40.3069	Chalkidiki	Drenia	Diplodus vulgaris	3	13
2016-09-16	23.9552	40.3069	Chalkidiki	Drenia	Oblada melanura	30	10
2016-09-16	23.9552	40.3069	Chalkidiki	Drenia	Oblada melanura	7	12
2016-09-16	23.9552	40.3069	Chalkidiki	Drenia	Serranus scriba	1	13
2016-09-16	23.9552	40.3069	Chalkidiki	Drenia	Sarpa salpa	5	13
2016-09-16	23.9552	40.3069	Chalkidiki	Drenia	Sarpa salpa	1	14
2016-09-16	23.9552	40.3069	Chalkidiki	Drenia	Diplodus annularis	1	9
2016-09-16	23.9552	40.3069	Chalkidiki	Drenia	Diplodus annularis	1	12
2016-09-16	23.9552	40.3069	Chalkidiki	Drenia	Diplodus vulgaris	1	9
2016-09-16	23.9552	40.3069	Chalkidiki	Drenia	Diplodus vulgaris	1	14
2016-09-16	23.9552	40.3069	Chalkidiki	Drenia	Diplodus vulgaris	4	12
2016-09-16	23.9552	40.3069	Chalkidiki	Drenia	Oblada melanura	30	10
2016-09-16	23.9552	40.3069	Chalkidiki	Drenia	Oblada melanura	15	9
2016-09-16	23.9552	40.3069	Chalkidiki	Drenia	Serranus scriba	1	10
2016-09-16	23.9552	40.3069	Chalkidiki	Drenia	Sarpa salpa	4	13
2016-09-16	23.9552	40.3069	Chalkidiki	Drenia	Diplodus annularis	1	7
2016-09-16	23.9552	40.3069	Chalkidiki	Drenia	Diplodus annularis	2	10
2016-09-16	23.9552	40.3069	Chalkidiki	Drenia	Diplodus vulgaris	15	12
2016-09-16	23.9552	40.3069	Chalkidiki	Drenia	Diplodus vulgaris	7	14
2016-09-16	23.9552	40.3069	Chalkidiki	Drenia	Diplodus vulgaris	17	13
2016-09-16	23.9552	40.3069	Chalkidiki	Drenia	Diplodus vulgaris	1	15
2016-09-16	23.9552	40.3069	Chalkidiki	Drenia	Diplodus vulgaris	6	5
2016-09-16	23.9552	40.3069	Chalkidiki	Drenia	Oblada melanura	5	11
2016-09-16	23.9552	40.3069	Chalkidiki	Drenia	Oblada melanura	8	10
2016-09-16	23.9552	40.3069	Chalkidiki	Drenia	Sarpa salpa	5	12
2016-09-16	23.9552	40.3069	Chalkidiki	Drenia	Sarpa salpa	4	13
2016-09-16	23.9552	40.3069	Chalkidiki	Drenia	Diplodus annularis	1	10
2016-09-16	23.9552	40.3069	Chalkidiki	Drenia	Diplodus annularis	1	6
2016-09-16	23.9552	40.3069	Chalkidiki	Drenia	Diplodus vulgaris	1	14
2016-09-16	23.9552	40.3069	Chalkidiki	Drenia	Diplodus vulgaris	5	11
2016-09-16	23.9552	40.3069	Chalkidiki	Drenia	Serranus scriba	1	8
2016-09-16	23.9552	40.3069	Chalkidiki	Drenia	Serranus scriba	1	10
2016-09-16	23.9552	40.3069	Chalkidiki	Drenia	Serranus scriba	1	9
2016-09-16	23.9552	40.3069	Chalkidiki	Drenia	Sarpa salpa	1	13
2016-09-16	23.9552	40.3069	Chalkidiki	Drenia	Sarpa salpa	15	9
2016-09-16	23.9552	40.3069	Chalkidiki	Drenia	Diplodus annularis	1	11
2016-09-16	23.9552	40.3069	Chalkidiki	Drenia	Diplodus sargus	1	17
2016-09-16	23.9552	40.3069	Chalkidiki	Drenia	Diplodus sargus	1	15
2016-09-16	23.9552	40.3069	Chalkidiki	Drenia	Diplodus vulgaris	4	12
2016-09-16	23.9552	40.3069	Chalkidiki	Drenia	Diplodus vulgaris	10	13
2016-09-16	23.9552	40.3069	Chalkidiki	Drenia	Diplodus vulgaris	5	10
2016-09-16	23.9552	40.3069	Chalkidiki	Drenia	Serranus scriba	1	9
2016-09-16	23.9552	40.3069	Chalkidiki	Drenia	Serranus scriba	1	11
2016-09-16	23.9552	40.3069	Chalkidiki	Drenia	Sparisoma cretense	1	13
2016-09-16	23.9552	40.3069	Chalkidiki	Drenia	Diplodus annularis	1	9
2016-09-16	23.9552	40.3069	Chalkidiki	Drenia	Diplodus sargus	5	13
2016-09-16	23.9552	40.3069	Chalkidiki	Drenia	Diplodus vulgaris	10	12
2016-09-16	23.9552	40.3069	Chalkidiki	Drenia	Diplodus vulgaris	5	13
2016-09-16	23.9552	40.3069	Chalkidiki	Drenia	Diplodus vulgaris	2	8
2016-09-16	23.9552	40.3069	Chalkidiki	Drenia	Diplodus puntazzo	1	14
2016-09-16	23.9552	40.3069	Chalkidiki	Drenia	Serranus scriba	1	11
2016-09-16	23.9552	40.3069	Chalkidiki	Drenia	Serranus scriba	1	8
2016-09-16	23.9552	40.3069	Chalkidiki	Drenia	Sarpa salpa	1	15
2016-09-16	23.9552	40.3069	Chalkidiki	Drenia	Sarpa salpa	6	9
2016-09-16	23.9552	40.3069	Chalkidiki	Drenia	Sparisoma cretense	1	17
2016-09-16	23.944	40.3078	Chalkidiki	Astakoi	Diplodus sargus	1	9
2016-09-16	23.944	40.3078	Chalkidiki	Astakoi	Diplodus vulgaris	5	9
2016-09-16	23.944	40.3078	Chalkidiki	Astakoi	Diplodus vulgaris	1	8
2016-09-16	23.944	40.3078	Chalkidiki	Astakoi	Diplodus vulgaris	1	11
2016-09-16	23.944	40.3078	Chalkidiki	Astakoi	Oblada melanura	2	8
2016-09-16	23.944	40.3078	Chalkidiki	Astakoi	Oblada melanura	20	6
2016-09-16	23.944	40.3078	Chalkidiki	Astakoi	Mullus surmuletus	1	11
2016-09-16	23.944	40.3078	Chalkidiki	Astakoi	Mullus surmuletus	1	13
2016-09-16	23.944	40.3078	Chalkidiki	Astakoi	Serranus scriba	3	12
2016-09-16	23.944	40.3078	Chalkidiki	Astakoi	Sarpa salpa	1	7
2016-09-16	23.944	40.3078	Chalkidiki	Astakoi	Scorpaena notata	3	10
2016-09-16	23.944	40.3078	Chalkidiki	Astakoi	Diplodus annularis	1	8
2016-09-16	23.944	40.3078	Chalkidiki	Astakoi	Diplodus sargus	1	18
2016-09-16	23.944	40.3078	Chalkidiki	Astakoi	Diplodus sargus	1	13
2016-09-16	23.944	40.3078	Chalkidiki	Astakoi	Diplodus vulgaris	5	7
2016-09-16	23.944	40.3078	Chalkidiki	Astakoi	Diplodus puntazzo	3	8
2016-09-16	23.944	40.3078	Chalkidiki	Astakoi	Oblada melanura	15	5
2016-09-16	23.944	40.3078	Chalkidiki	Astakoi	Oblada melanura	2	12
2016-09-16	23.944	40.3078	Chalkidiki	Astakoi	Oblada melanura	1	10
2016-09-16	23.944	40.3078	Chalkidiki	Astakoi	Serranus scriba	1	14
2016-09-16	23.944	40.3078	Chalkidiki	Astakoi	Sarpa salpa	6	13
2016-09-16	23.944	40.3078	Chalkidiki	Astakoi	Sarpa salpa	5	14
2016-09-16	23.944	40.3078	Chalkidiki	Astakoi	Diplodus annularis	1	9
2016-09-16	23.944	40.3078	Chalkidiki	Astakoi	Diplodus sargus	1	16
2016-09-16	23.944	40.3078	Chalkidiki	Astakoi	Diplodus vulgaris	3	9
2016-09-16	23.944	40.3078	Chalkidiki	Astakoi	Diplodus vulgaris	1	11
2016-09-16	23.944	40.3078	Chalkidiki	Astakoi	Oblada melanura	20	6
2016-09-16	23.944	40.3078	Chalkidiki	Astakoi	Serranus scriba	1	12
2016-09-16	23.944	40.3078	Chalkidiki	Astakoi	Sarpa salpa	25	9
2016-09-16	23.944	40.3078	Chalkidiki	Astakoi	Sarpa salpa	15	18
2016-09-16	23.944	40.3078	Chalkidiki	Astakoi	Diplodus annularis	1	9
2016-09-16	23.944	40.3078	Chalkidiki	Astakoi	Diplodus annularis	3	10
2016-09-16	23.944	40.3078	Chalkidiki	Astakoi	Diplodus vulgaris	1	7
2016-09-16	23.944	40.3078	Chalkidiki	Astakoi	Diplodus vulgaris	1	10
2016-09-16	23.944	40.3078	Chalkidiki	Astakoi	Diplodus vulgaris	2	14
2016-09-16	23.944	40.3078	Chalkidiki	Astakoi	Diplodus puntazzo	1	13
2016-09-16	23.944	40.3078	Chalkidiki	Astakoi	Diplodus puntazzo	1	17
2016-09-16	23.944	40.3078	Chalkidiki	Astakoi	Mullus surmuletus	1	11
2016-09-16	23.944	40.3078	Chalkidiki	Astakoi	Serranus scriba	1	13
2016-09-16	23.944	40.3078	Chalkidiki	Astakoi	Serranus scriba	1	9
2016-09-16	23.944	40.3078	Chalkidiki	Astakoi	Serranus scriba	1	16
2016-09-16	23.944	40.3078	Chalkidiki	Astakoi	Sarpa salpa	3	15
2016-09-16	23.944	40.3078	Chalkidiki	Astakoi	Sarpa salpa	5	8
2016-09-16	23.944	40.3078	Chalkidiki	Astakoi	Diplodus annularis	3	11
2016-09-16	23.944	40.3078	Chalkidiki	Astakoi	Diplodus annularis	1	16
2016-09-16	23.944	40.3078	Chalkidiki	Astakoi	Diplodus vulgaris	1	10
2016-09-16	23.944	40.3078	Chalkidiki	Astakoi	Diplodus vulgaris	1	11
2016-09-16	23.944	40.3078	Chalkidiki	Astakoi	Diplodus vulgaris	2	9
2016-09-16	23.944	40.3078	Chalkidiki	Astakoi	Oblada melanura	3	9
2016-09-16	23.944	40.3078	Chalkidiki	Astakoi	Mullus surmuletus	1	8
2016-09-16	23.944	40.3078	Chalkidiki	Astakoi	Serranus scriba	1	9
2016-09-19	25.8866	38.2154	Chios	Galapagos	Serranus scriba	1	12
2016-09-19	25.8866	38.2154	Chios	Galapagos	Sarpa salpa	3	8
2016-09-19	25.8866	38.2154	Chios	Galapagos	Sarpa salpa	4	17
2016-09-19	25.8866	38.2154	Chios	Galapagos	Sarpa salpa	10	15
2016-09-19	25.8866	38.2154	Chios	Galapagos	Sarpa salpa	5	10
2016-09-19	25.8866	38.2154	Chios	Galapagos	Sparisoma cretense	1	11
2016-09-19	25.8866	38.2154	Chios	Galapagos	Sparisoma cretense	4	13
2016-09-19	25.8866	38.2154	Chios	Galapagos	Sparisoma cretense	1	19
2016-09-19	25.8866	38.2154	Chios	Galapagos	Sparisoma cretense	1	17
2016-09-19	25.8866	38.2154	Chios	Galapagos	Siganus luridus	4	15
2016-09-19	25.8866	38.2154	Chios	Galapagos	Siganus luridus	3	12
2016-09-19	25.8866	38.2154	Chios	Galapagos	Scorpaena notata	1	7
2016-09-19	25.8866	38.2154	Chios	Galapagos	Diplodus sargus	2	13
2016-09-19	25.8866	38.2154	Chios	Galapagos	Diplodus sargus	1	16
2016-09-19	25.8866	38.2154	Chios	Galapagos	Diplodus vulgaris	9	8
2016-09-19	25.8866	38.2154	Chios	Galapagos	Oblada melanura	15	7
2016-09-19	25.8866	38.2154	Chios	Galapagos	Serranus scriba	1	9
2016-09-19	25.8866	38.2154	Chios	Galapagos	Sarpa salpa	4	12
2016-09-19	25.8866	38.2154	Chios	Galapagos	Sarpa salpa	2	13
2016-09-19	25.8866	38.2154	Chios	Galapagos	Sarpa salpa	2	19
2016-09-19	25.8866	38.2154	Chios	Galapagos	Sparisoma cretense	1	20
2016-09-19	25.8866	38.2154	Chios	Galapagos	Sparisoma cretense	1	15
2016-09-19	25.8866	38.2154	Chios	Galapagos	Sparisoma cretense	5	13
2016-09-19	25.8866	38.2154	Chios	Galapagos	Sparisoma cretense	1	17
2016-09-19	25.8866	38.2154	Chios	Galapagos	Sparisoma cretense	10	11
2016-09-19	25.8866	38.2154	Chios	Galapagos	Siganus luridus	2	13
2016-09-19	25.8866	38.2154	Chios	Galapagos	Diplodus sargus	1	13
2016-09-19	25.8866	38.2154	Chios	Galapagos	Diplodus sargus	2	12
2016-09-19	25.8866	38.2154	Chios	Galapagos	Diplodus vulgaris	5	12
2016-09-19	25.8866	38.2154	Chios	Galapagos	Diplodus vulgaris	2	10
2016-09-19	25.8866	38.2154	Chios	Galapagos	Diplodus vulgaris	3	11
2016-09-19	25.8866	38.2154	Chios	Galapagos	Oblada melanura	3	8
2016-09-19	25.8866	38.2154	Chios	Galapagos	Serranus scriba	1	8
2016-09-19	25.8866	38.2154	Chios	Galapagos	Sarpa salpa	7	12
2016-09-19	25.8866	38.2154	Chios	Galapagos	Sarpa salpa	5	10
2016-09-19	25.8866	38.2154	Chios	Galapagos	Sparisoma cretense	2	16
2016-09-19	25.8866	38.2154	Chios	Galapagos	Sparisoma cretense	2	15
2016-09-19	25.8866	38.2154	Chios	Galapagos	Sparisoma cretense	4	12
2016-09-19	25.8866	38.2154	Chios	Galapagos	Siganus luridus	3	14
2016-09-19	25.8866	38.2154	Chios	Galapagos	Siganus luridus	2	15
2016-09-19	25.8866	38.2154	Chios	Galapagos	Diplodus sargus	1	17
2016-09-19	25.8866	38.2154	Chios	Galapagos	Mullus surmuletus	2	12
2016-09-19	25.8866	38.2154	Chios	Galapagos	Serranus scriba	1	14
2016-09-19	25.8866	38.2154	Chios	Galapagos	Sparisoma cretense	1	17
2016-09-19	25.8866	38.2154	Chios	Galapagos	Sparisoma cretense	8	14
2016-09-19	25.8866	38.2154	Chios	Galapagos	Sparisoma cretense	4	10
2016-09-19	25.8866	38.2154	Chios	Galapagos	Sparisoma cretense	3	11
2016-09-19	25.8866	38.2154	Chios	Galapagos	Siganus luridus	3	17
2016-09-19	25.8866	38.2154	Chios	Galapagos	Siganus luridus	4	15
2016-09-19	25.8866	38.2154	Chios	Galapagos	Diplodus sargus	3	15
2016-09-19	25.8866	38.2154	Chios	Galapagos	Diplodus vulgaris	8	10
2016-09-19	25.8866	38.2154	Chios	Galapagos	Diplodus vulgaris	7	9
2016-09-19	25.8866	38.2154	Chios	Galapagos	Diplodus vulgaris	8	13
2016-09-19	25.8866	38.2154	Chios	Galapagos	Mullus surmuletus	1	13
2016-09-19	25.8866	38.2154	Chios	Galapagos	Mullus surmuletus	1	9
2016-09-19	25.8866	38.2154	Chios	Galapagos	Mullus surmuletus	1	10
2016-09-19	25.8866	38.2154	Chios	Galapagos	Serranus scriba	2	11
2016-09-19	25.8866	38.2154	Chios	Galapagos	Serranus scriba	1	13
2016-09-19	25.8866	38.2154	Chios	Galapagos	Sparisoma cretense	3	11
2016-09-19	25.8866	38.2154	Chios	Galapagos	Sparisoma cretense	4	16
2016-09-19	25.8866	38.2154	Chios	Galapagos	Sparisoma cretense	5	9
2016-09-19	25.8866	38.2154	Chios	Galapagos	Siganus luridus	8	16
2016-09-19	25.8866	38.2154	Chios	Galapagos	Siganus luridus	3	12
2016-09-19	25.8866	38.2154	Chios	Galapagos	Diplodus sargus	4	16
2016-09-19	25.8866	38.2154	Chios	Galapagos	Diplodus vulgaris	8	11
2016-09-19	25.8866	38.2154	Chios	Galapagos	Diplodus vulgaris	4	13
2016-09-19	25.8866	38.2154	Chios	Galapagos	Diplodus vulgaris	8	15
2016-09-19	25.8866	38.2154	Chios	Galapagos	Oblada melanura	2	13
2016-09-19	25.8866	38.2154	Chios	Galapagos	Mullus surmuletus	1	11
2016-09-19	25.8866	38.2154	Chios	Galapagos	Serranus scriba	1	11
2016-09-19	25.8866	38.2154	Chios	Galapagos	Sparisoma cretense	3	15
2016-09-19	25.8866	38.2154	Chios	Galapagos	Sparisoma cretense	4	9
2016-09-19	25.8866	38.2154	Chios	Galapagos	Sparisoma cretense	2	13
2016-09-19	25.8866	38.2154	Chios	Galapagos	Sparisoma cretense	1	18
2016-09-19	25.8866	38.2154	Chios	Galapagos	Siganus luridus	1	17
2016-09-19	25.8866	38.2154	Chios	Galapagos	Siganus luridus	2	16
2016-09-19	25.8866	38.2154	Chios	Galapagos	Epinephelus costae	1	20
2016-09-19	25.8866	38.2154	Chios	Galapagos	Scorpaena notata	1	8
2016-09-19	25.8632	38.2479	Chios	Pachi nisi	Diplodus sargus	1	14
2016-09-19	25.8632	38.2479	Chios	Pachi nisi	Diplodus sargus	2	19
2016-09-19	25.8632	38.2479	Chios	Pachi nisi	Diplodus sargus	1	16
2016-09-19	25.8632	38.2479	Chios	Pachi nisi	Diplodus sargus	3	11
2016-09-19	25.8632	38.2479	Chios	Pachi nisi	Diplodus vulgaris	3	15
2016-09-19	25.8632	38.2479	Chios	Pachi nisi	Diplodus vulgaris	2	14
2016-09-19	25.8632	38.2479	Chios	Pachi nisi	Diplodus vulgaris	5	13
2016-09-19	25.8632	38.2479	Chios	Pachi nisi	Diplodus puntazzo	1	15
2016-09-19	25.8632	38.2479	Chios	Pachi nisi	Sparisoma cretense	7	13
2016-09-19	25.8632	38.2479	Chios	Pachi nisi	Sparisoma cretense	3	15
2016-09-19	25.8632	38.2479	Chios	Pachi nisi	Siganus luridus	1	14
2016-09-19	25.8632	38.2479	Chios	Pachi nisi	Diplodus sargus	3	17
2016-09-19	25.8632	38.2479	Chios	Pachi nisi	Diplodus sargus	2	16
2016-09-19	25.8632	38.2479	Chios	Pachi nisi	Diplodus vulgaris	8	14
2016-09-19	25.8632	38.2479	Chios	Pachi nisi	Diplodus vulgaris	8	11
2016-09-19	25.8632	38.2479	Chios	Pachi nisi	Diplodus vulgaris	7	8
2016-09-19	25.8632	38.2479	Chios	Pachi nisi	Mullus surmuletus	1	12
2016-09-19	25.8632	38.2479	Chios	Pachi nisi	Serranus scriba	1	10
2016-09-19	25.8632	38.2479	Chios	Pachi nisi	Serranus scriba	1	11
2016-09-19	25.8632	38.2479	Chios	Pachi nisi	Sparisoma cretense	3	12
2016-09-19	25.8632	38.2479	Chios	Pachi nisi	Sparisoma cretense	1	20
2016-09-19	25.8632	38.2479	Chios	Pachi nisi	Sparisoma cretense	6	14
2016-09-19	25.8632	38.2479	Chios	Pachi nisi	Diplodus sargus	1	25
2016-09-19	25.8632	38.2479	Chios	Pachi nisi	Diplodus vulgaris	2	12
2016-09-19	25.8632	38.2479	Chios	Pachi nisi	Diplodus vulgaris	4	11
2016-09-19	25.8632	38.2479	Chios	Pachi nisi	Diplodus vulgaris	3	14
2016-09-19	25.8632	38.2479	Chios	Pachi nisi	serranus cabrilla	1	11
2016-09-19	25.8632	38.2479	Chios	Pachi nisi	Serranus scriba	1	10
2016-09-19	25.8632	38.2479	Chios	Pachi nisi	Serranus scriba	1	12
2016-09-19	25.8632	38.2479	Chios	Pachi nisi	Sparisoma cretense	2	11
2016-09-19	25.8632	38.2479	Chios	Pachi nisi	Sparisoma cretense	1	13
2016-09-19	25.8632	38.2479	Chios	Pachi nisi	Siganus luridus	2	15
2016-09-19	25.8632	38.2479	Chios	Pachi nisi	Diplodus sargus	1	12
2016-09-19	25.8632	38.2479	Chios	Pachi nisi	Diplodus vulgaris	1	16
2016-09-19	25.8632	38.2479	Chios	Pachi nisi	Diplodus vulgaris	1	11
2016-09-19	25.8632	38.2479	Chios	Pachi nisi	Diplodus vulgaris	1	14
2016-09-19	25.8632	38.2479	Chios	Pachi nisi	Sarpa salpa	2	14
2016-09-19	25.8632	38.2479	Chios	Pachi nisi	Sarpa salpa	5	12
2016-09-19	25.8632	38.2479	Chios	Pachi nisi	Sparisoma cretense	1	19
2016-09-19	25.8632	38.2479	Chios	Pachi nisi	Sparisoma cretense	15	10
2016-09-19	25.8632	38.2479	Chios	Pachi nisi	Sparisoma cretense	1	22
2016-09-19	25.8632	38.2479	Chios	Pachi nisi	Diplodus sargus	1	12
2016-09-19	25.8632	38.2479	Chios	Pachi nisi	Diplodus sargus	1	14
2016-09-19	25.8632	38.2479	Chios	Pachi nisi	Diplodus vulgaris	1	17
2016-09-19	25.8632	38.2479	Chios	Pachi nisi	Diplodus vulgaris	5	13
2016-09-19	25.8632	38.2479	Chios	Pachi nisi	Diplodus vulgaris	1	16
2016-09-19	25.8632	38.2479	Chios	Pachi nisi	Oblada melanura	30	5
2016-09-19	25.8632	38.2479	Chios	Pachi nisi	Serranus scriba	1	13
2016-09-19	25.8632	38.2479	Chios	Pachi nisi	Sarpa salpa	4	18
2016-09-19	25.8632	38.2479	Chios	Pachi nisi	Sarpa salpa	3	15
2016-09-19	25.8632	38.2479	Chios	Pachi nisi	Sparisoma cretense	1	20
2016-09-19	25.8632	38.2479	Chios	Pachi nisi	Sparisoma cretense	9	17
2016-09-19	25.8632	38.2479	Chios	Pachi nisi	Sparisoma cretense	7	15
2016-09-19	25.8632	38.2479	Chios	Pachi nisi	Sparisoma cretense	1	25
2016-09-19	25.8632	38.2479	Chios	Pachi nisi	Siganus luridus	3	15
2016-09-19	25.8632	38.2479	Chios	Pachi nisi	Siganus luridus	2	13
2016-09-19	25.8632	38.2479	Chios	Pachi nisi	Epinephelus costae	1	14
2016-09-19	25.8632	38.2479	Chios	Pachi nisi	Diplodus vulgaris	3	15
2016-09-19	25.8632	38.2479	Chios	Pachi nisi	Diplodus vulgaris	6	13
2016-09-19	25.8632	38.2479	Chios	Pachi nisi	Diplodus vulgaris	3	10
2016-09-19	25.8632	38.2479	Chios	Pachi nisi	Diplodus vulgaris	6	12
2016-09-19	25.8632	38.2479	Chios	Pachi nisi	Diplodus puntazzo	1	12
2016-09-19	25.8632	38.2479	Chios	Pachi nisi	Sarpa salpa	3	10
2016-09-19	25.8632	38.2479	Chios	Pachi nisi	Sarpa salpa	10	15
2016-09-19	25.8632	38.2479	Chios	Pachi nisi	Sarpa salpa	8	16
2016-09-19	25.8632	38.2479	Chios	Pachi nisi	Sparisoma cretense	1	17
2016-09-19	25.8632	38.2479	Chios	Pachi nisi	Sparisoma cretense	8	14
2016-09-19	25.8632	38.2479	Chios	Pachi nisi	Sparisoma cretense	1	11
2016-09-19	25.8632	38.2479	Chios	Pachi nisi	Siganus luridus	1	15
2016-09-19	25.8632	38.2479	Chios	Pachi nisi	Siganus luridus	3	14
2016-09-20	26.1456	38.4443	Chios	Glaroi	Diplodus annularis	8	7
2016-09-20	26.1456	38.4443	Chios	Glaroi	Diplodus annularis	1	9
2016-09-20	26.1456	38.4443	Chios	Glaroi	Diplodus vulgaris	13	6
2016-09-20	26.1456	38.4443	Chios	Glaroi	Diplodus vulgaris	8	13
2016-09-20	26.1456	38.4443	Chios	Glaroi	Diplodus puntazzo	1	9
2016-09-20	26.1456	38.4443	Chios	Glaroi	Oblada melanura	1	13
2016-09-20	26.1456	38.4443	Chios	Glaroi	Oblada melanura	15	10
2016-09-20	26.1456	38.4443	Chios	Glaroi	Serranus scriba	1	7
2016-09-20	26.1456	38.4443	Chios	Glaroi	Serranus scriba	1	12
2016-09-20	26.1456	38.4443	Chios	Glaroi	Sarpa salpa	50	7
2016-09-20	26.1456	38.4443	Chios	Glaroi	Diplodus annularis	3	8
2016-09-20	26.1456	38.4443	Chios	Glaroi	Diplodus annularis	1	10
2016-09-20	26.1456	38.4443	Chios	Glaroi	Diplodus vulgaris	2	6
2016-09-20	26.1456	38.4443	Chios	Glaroi	Diplodus vulgaris	3	11
2016-09-20	26.1456	38.4443	Chios	Glaroi	Oblada melanura	15	5
2016-09-20	26.1456	38.4443	Chios	Glaroi	Serranus scriba	1	9
2016-09-20	26.1456	38.4443	Chios	Glaroi	Serranus scriba	1	11
2016-09-20	26.1456	38.4443	Chios	Glaroi	Sparisoma cretense	1	15
2016-09-20	26.1456	38.4443	Chios	Glaroi	Diplodus annularis	1	10
2016-09-20	26.1456	38.4443	Chios	Glaroi	Diplodus sargus	2	6
2016-09-20	26.1456	38.4443	Chios	Glaroi	Diplodus sargus	1	8
2016-09-20	26.1456	38.4443	Chios	Glaroi	Diplodus vulgaris	7	8
2016-09-20	26.1456	38.4443	Chios	Glaroi	Oblada melanura	20	5
2016-09-20	26.1456	38.4443	Chios	Glaroi	Oblada melanura	7	11
2016-09-20	26.1456	38.4443	Chios	Glaroi	Mullus surmuletus	1	12
2016-09-20	26.1456	38.4443	Chios	Glaroi	Serranus scriba	2	13
2016-09-20	26.1456	38.4443	Chios	Glaroi	Serranus scriba	1	12
2016-09-20	26.1456	38.4443	Chios	Glaroi	Serranus scriba	1	8
2016-09-20	26.1456	38.4443	Chios	Glaroi	Sarpa salpa	4	14
2016-09-20	26.1456	38.4443	Chios	Glaroi	Sparisoma cretense	1	13
2016-09-20	26.1456	38.4443	Chios	Glaroi	Diplodus annularis	4	10
2016-09-20	26.1456	38.4443	Chios	Glaroi	Diplodus annularis	1	11
2016-09-20	26.1456	38.4443	Chios	Glaroi	Diplodus sargus	1	14
2016-09-20	26.1456	38.4443	Chios	Glaroi	Diplodus vulgaris	8	7
2016-09-20	26.1456	38.4443	Chios	Glaroi	Diplodus vulgaris	1	10
2016-09-20	26.1456	38.4443	Chios	Glaroi	Diplodus vulgaris	6	12
2016-09-20	26.1456	38.4443	Chios	Glaroi	Diplodus puntazzo	1	14
2016-09-20	26.1456	38.4443	Chios	Glaroi	Serranus scriba	1	11
2016-09-20	26.1456	38.4443	Chios	Glaroi	Sarpa salpa	30	12
2016-09-20	26.1456	38.4443	Chios	Glaroi	Sparisoma cretense	1	13
2016-09-20	26.1456	38.4443	Chios	Glaroi	Diplodus annularis	1	10
2016-09-20	26.1456	38.4443	Chios	Glaroi	Diplodus sargus	1	11
2016-09-20	26.1456	38.4443	Chios	Glaroi	Diplodus vulgaris	2	12
2016-09-20	26.1456	38.4443	Chios	Glaroi	Diplodus vulgaris	1	7
2016-09-20	26.1456	38.4443	Chios	Glaroi	Diplodus puntazzo	1	12
2016-09-20	26.1456	38.4443	Chios	Glaroi	Diplodus puntazzo	1	13
2016-09-20	26.1456	38.4443	Chios	Glaroi	Oblada melanura	1	6
2016-09-20	26.1456	38.4443	Chios	Glaroi	Mullus surmuletus	2	10
2016-09-20	26.1456	38.4443	Chios	Glaroi	Serranus scriba	1	9
2016-09-20	26.1456	38.4443	Chios	Glaroi	Diplodus annularis	1	7
2016-09-20	26.1456	38.4443	Chios	Glaroi	Diplodus vulgaris	1	9
2016-09-20	26.1456	38.4443	Chios	Glaroi	Diplodus puntazzo	1	13
2016-09-20	26.1456	38.4443	Chios	Glaroi	Serranus scriba	1	8
2016-09-20	26.1456	38.4443	Chios	Glaroi	Serranus scriba	1	10
2016-09-20	26.1456	38.4443	Chios	Glaroi	Serranus scriba	1	13
2016-09-20	25.9404	38.3196	Chios	Pelogonisos	Diplodus vulgaris	1	7
2016-09-20	25.9404	38.3196	Chios	Pelogonisos	Diplodus vulgaris	4	13
2016-09-20	25.9404	38.3196	Chios	Pelogonisos	Diplodus puntazzo	1	13
2016-09-20	25.9404	38.3196	Chios	Pelogonisos	Oblada melanura	1	9
2016-09-20	25.9404	38.3196	Chios	Pelogonisos	Serranus scriba	1	8
2016-09-20	25.9404	38.3196	Chios	Pelogonisos	Serranus scriba	1	13
2016-09-20	25.9404	38.3196	Chios	Pelogonisos	Sarpa salpa	20	13
2016-09-20	25.9404	38.3196	Chios	Pelogonisos	Siganus luridus	12	14
2016-09-20	25.9404	38.3196	Chios	Pelogonisos	Siganus luridus	15	13
2016-09-20	25.9404	38.3196	Chios	Pelogonisos	Diplodus vulgaris	6	12
2016-09-20	25.9404	38.3196	Chios	Pelogonisos	Serranus scriba	5	13
2016-09-20	25.9404	38.3196	Chios	Pelogonisos	Sarpa salpa	15	13
2016-09-20	25.9404	38.3196	Chios	Pelogonisos	Sparisoma cretense	2	22
2016-09-20	25.9404	38.3196	Chios	Pelogonisos	Sparisoma cretense	1	15
2016-09-20	25.9404	38.3196	Chios	Pelogonisos	Siganus luridus	7	15
2016-09-20	25.9404	38.3196	Chios	Pelogonisos	Siganus luridus	6	13
2016-09-20	25.9404	38.3196	Chios	Pelogonisos	Diplodus vulgaris	7	13
2016-09-20	25.9404	38.3196	Chios	Pelogonisos	Diplodus vulgaris	5	12
2016-09-20	25.9404	38.3196	Chios	Pelogonisos	Oblada melanura	20	12
2016-09-20	25.9404	38.3196	Chios	Pelogonisos	Oblada melanura	5	12
2016-09-20	25.9404	38.3196	Chios	Pelogonisos	Mullus surmuletus	1	11
2016-09-20	25.9404	38.3196	Chios	Pelogonisos	Serranus cabrilla	1	13
2016-09-20	25.9404	38.3196	Chios	Pelogonisos	Serranus scriba	7	13
2016-09-20	25.9404	38.3196	Chios	Pelogonisos	Serranus scriba	1	14
2016-09-20	25.9404	38.3196	Chios	Pelogonisos	Sarpa salpa	4	10
2016-09-20	25.9404	38.3196	Chios	Pelogonisos	Sarpa salpa	5	13
2016-09-20	25.9404	38.3196	Chios	Pelogonisos	Sarpa salpa	9	12
2016-09-20	25.9404	38.3196	Chios	Pelogonisos	Sparisoma cretense	3	16
2016-09-20	25.9404	38.3196	Chios	Pelogonisos	Siganus luridus	5	15
2016-09-20	25.9404	38.3196	Chios	Pelogonisos	Siganus luridus	2	13
2016-09-20	25.9404	38.3196	Chios	Pelogonisos	Diplodus vulgaris	3	12
2016-09-20	25.9404	38.3196	Chios	Pelogonisos	Mullus surmuletus	1	16
2016-09-20	25.9404	38.3196	Chios	Pelogonisos	Mullus surmuletus	1	13
2016-09-20	25.9404	38.3196	Chios	Pelogonisos	Serranus cabrilla	1	10
2016-09-20	25.9404	38.3196	Chios	Pelogonisos	Serranus scriba	1	8
2016-09-20	25.9404	38.3196	Chios	Pelogonisos	Serranus scriba	2	12
2016-09-20	25.9404	38.3196	Chios	Pelogonisos	Spondyliosoma cantharus	1	12
2016-09-20	25.9404	38.3196	Chios	Pelogonisos	Spondyliosoma cantharus	1	10
2016-09-20	25.9404	38.3196	Chios	Pelogonisos	Diplodus annularis	2	10
2016-09-20	25.9404	38.3196	Chios	Pelogonisos	Diplodus vulgaris	4	13
2016-09-20	25.9404	38.3196	Chios	Pelogonisos	Diplodus vulgaris	3	12
2016-09-20	25.9404	38.3196	Chios	Pelogonisos	Serranus cabrilla	1	11
2016-09-20	25.9404	38.3196	Chios	Pelogonisos	Mullus surmuletus	8	10
2016-09-20	25.9404	38.3196	Chios	Pelogonisos	Serranus cabrilla	1	10
2016-09-20	25.9404	38.3196	Chios	Pelogonisos	Serranus scriba	1	9
2016-09-20	25.9404	38.3196	Chios	Pelogonisos	Serranus scriba	2	13
2016-09-20	25.9404	38.3196	Chios	Pelogonisos	Serranus scriba	2	12
2016-09-20	25.9404	38.3196	Chios	Pelogonisos	Sparisoma cretense	1	13
2016-09-20	25.9404	38.3196	Chios	Pelogonisos	Siganus luridus	1	14
2016-09-20	25.9404	38.3196	Chios	Pelogonisos	Siganus luridus	2	13
2016-09-20	25.9404	38.3196	Chios	Pelogonisos	Scorpaena notata	1	8
2016-09-21	26.3417	39.3908	Lesvos	Korakas	Diplodus annularis	2	9
2016-09-21	26.3417	39.3908	Lesvos	Korakas	Diplodus annularis	1	11
2016-09-21	26.3417	39.3908	Lesvos	Korakas	Diplodus sargus	1	13
2016-09-21	26.3417	39.3908	Lesvos	Korakas	Diplodus vulgaris	4	5
2016-09-21	26.3417	39.3908	Lesvos	Korakas	Diplodus vulgaris	1	12
2016-09-21	26.3417	39.3908	Lesvos	Korakas	Diplodus vulgaris	4	10
2016-09-21	26.3417	39.3908	Lesvos	Korakas	Mullus surmuletus	1	9
2016-09-21	26.3417	39.3908	Lesvos	Korakas	Sparisoma cretense	3	14
2016-09-21	26.3417	39.3908	Lesvos	Korakas	Sparisoma cretense	1	12
2016-09-21	26.3417	39.3908	Lesvos	Korakas	Diplodus annularis	4	10
2016-09-21	26.3417	39.3908	Lesvos	Korakas	Diplodus vulgaris	1	13
2016-09-21	26.3417	39.3908	Lesvos	Korakas	Diplodus vulgaris	3	5
2016-09-21	26.3417	39.3908	Lesvos	Korakas	Diplodus vulgaris	1	10
2016-09-21	26.3417	39.3908	Lesvos	Korakas	Diplodus puntazzo	1	13
2016-09-21	26.3417	39.3908	Lesvos	Korakas	Mullus surmuletus	3	10
2016-09-21	26.3417	39.3908	Lesvos	Korakas	Mullus surmuletus	1	9
2016-09-21	26.3417	39.3908	Lesvos	Korakas	Serranus scriba	12	1
2016-09-21	26.3417	39.3908	Lesvos	Korakas	Sarpa salpa	3	14
2016-09-21	26.3417	39.3908	Lesvos	Korakas	Sparisoma cretense	1	20
2016-09-21	26.3417	39.3908	Lesvos	Korakas	Sparisoma cretense	1	13
2016-09-21	26.3417	39.3908	Lesvos	Korakas	Diplodus annularis	1	8
2016-09-21	26.3417	39.3908	Lesvos	Korakas	Diplodus annularis	6	10
2016-09-21	26.3417	39.3908	Lesvos	Korakas	Diplodus vulgaris	4	11
2016-09-21	26.3417	39.3908	Lesvos	Korakas	Diplodus vulgaris	1	10
2016-09-21	26.3417	39.3908	Lesvos	Korakas	Diplodus puntazzo	1	7
2016-09-21	26.3417	39.3908	Lesvos	Korakas	Serranus cabrilla	1	10
2016-09-21	26.3417	39.3908	Lesvos	Korakas	Sarpa salpa	7	13
2016-09-21	26.3417	39.3908	Lesvos	Korakas	Sparisoma cretense	1	10
2016-09-21	26.3417	39.3908	Lesvos	Korakas	Scorpaena scofa	1	20
2016-09-21	26.3417	39.3908	Lesvos	Korakas	Diplodus sargus	1	13
2016-09-21	26.3417	39.3908	Lesvos	Korakas	Diplodus sargus	1	15
2016-09-21	26.3417	39.3908	Lesvos	Korakas	Diplodus vulgaris	4	9
2016-09-21	26.3417	39.3908	Lesvos	Korakas	Diplodus vulgaris	3	14
2016-09-21	26.3417	39.3908	Lesvos	Korakas	Diplodus vulgaris	2	12
2016-09-21	26.3417	39.3908	Lesvos	Korakas	Mullus surmuletus	1	10
2016-09-21	26.3417	39.3908	Lesvos	Korakas	Mullus surmuletus	1	8
2016-09-21	26.3417	39.3908	Lesvos	Korakas	Serranus cabrilla	1	10
2016-09-21	26.3417	39.3908	Lesvos	Korakas	Sarpa salpa	30	15
2016-09-21	26.3417	39.3908	Lesvos	Korakas	Sparisoma cretense	1	18
2016-09-21	26.3417	39.3908	Lesvos	Korakas	Sparisoma cretense	1	16
2016-09-21	26.3417	39.3908	Lesvos	Korakas	Spondyliosoma cantharus	1	14
2016-09-21	26.3417	39.3908	Lesvos	Korakas	Diplodus sargus	1	13
2016-09-21	26.3417	39.3908	Lesvos	Korakas	Diplodus vulgaris	3	5
2016-09-21	26.3417	39.3908	Lesvos	Korakas	Diplodus vulgaris	1	12
2016-09-21	26.3417	39.3908	Lesvos	Korakas	Diplodus vulgaris	1	14
2016-09-21	26.3417	39.3908	Lesvos	Korakas	Diplodus puntazzo	1	16
2016-09-21	26.3417	39.3908	Lesvos	Korakas	Diplodus puntazzo	1	13
2016-09-21	26.3417	39.3908	Lesvos	Korakas	Mullus surmuletus	1	10
2016-09-21	26.3417	39.3908	Lesvos	Korakas	Serranus cabrilla	1	11
2016-09-21	26.3417	39.3908	Lesvos	Korakas	Serranus scriba	1	10
2016-09-21	26.3417	39.3908	Lesvos	Korakas	Serranus scriba	1	12
2016-09-21	26.3417	39.3908	Lesvos	Korakas	Serranus scriba	1	9
2016-09-21	26.3417	39.3908	Lesvos	Korakas	Sparisoma cretense	1	15
2016-09-21	26.3417	39.3908	Lesvos	Korakas	Diplodus sargus	3	14
2016-09-21	26.3417	39.3908	Lesvos	Korakas	Diplodus sargus	2	13
2016-09-21	26.3417	39.3908	Lesvos	Korakas	Diplodus vulgaris	7	13
2016-09-21	26.3417	39.3908	Lesvos	Korakas	Diplodus vulgaris	5	10
2016-09-21	26.3417	39.3908	Lesvos	Korakas	Diplodus puntazzo	1	7
2016-09-21	26.3417	39.3908	Lesvos	Korakas	Serranus scriba	3	10
2016-09-21	26.3417	39.3908	Lesvos	Korakas	Spondyliosoma cantharus	3	12
2016-09-22	25.9096	39.2944	Lesvos	Pochi	Diplodus sargus	1	14
2016-09-22	25.9096	39.2944	Lesvos	Pochi	Diplodus vulgaris	1	10
2016-09-22	25.9096	39.2944	Lesvos	Pochi	Diplodus vulgaris	3	9
2016-09-22	25.9096	39.2944	Lesvos	Pochi	Diplodus puntazzo	1	13
2016-09-22	25.9096	39.2944	Lesvos	Pochi	Serranus cabrilla	1	12
2016-09-22	25.9096	39.2944	Lesvos	Pochi	Serranus scriba	3	13
2016-09-22	25.9096	39.2944	Lesvos	Pochi	Diplodus sargus	4	13
2016-09-22	25.9096	39.2944	Lesvos	Pochi	Diplodus sargus	3	15
2016-09-22	25.9096	39.2944	Lesvos	Pochi	Diplodus vulgaris	4	5
2016-09-22	25.9096	39.2944	Lesvos	Pochi	Diplodus vulgaris	2	7
2016-09-22	25.9096	39.2944	Lesvos	Pochi	Diplodus puntazzo	1	15
2016-09-22	25.9096	39.2944	Lesvos	Pochi	Sarpa salpa	25	17
2016-09-22	25.9096	39.2944	Lesvos	Pochi	Diplodus vulgaris	4	8
2016-09-22	25.9096	39.2944	Lesvos	Pochi	Diplodus vulgaris	9	5
2016-09-22	25.9096	39.2944	Lesvos	Pochi	Diplodus vulgaris	4	10
2016-09-22	25.9096	39.2944	Lesvos	Pochi	Diplodus puntazzo	2	14
2016-09-22	25.9096	39.2944	Lesvos	Pochi	Serranus cabrilla	2	13
2016-09-22	25.9096	39.2944	Lesvos	Pochi	Serranus cabrilla	1	9
2016-09-22	25.9096	39.2944	Lesvos	Pochi	Serranus cabrilla	1	14
2016-09-22	25.9096	39.2944	Lesvos	Pochi	Serranus scriba	3	14
2016-09-22	25.9096	39.2944	Lesvos	Pochi	Diplodus sargus	1	13
2016-09-22	25.9096	39.2944	Lesvos	Pochi	Diplodus vulgaris	1	15
2016-09-22	25.9096	39.2944	Lesvos	Pochi	Diplodus vulgaris	20	13
2016-09-22	25.9096	39.2944	Lesvos	Pochi	Diplodus vulgaris	5	14
2016-09-22	25.9096	39.2944	Lesvos	Pochi	Diplodus vulgaris	8	10
2016-09-22	25.9096	39.2944	Lesvos	Pochi	Diplodus puntazzo	1	14
2016-09-22	25.9096	39.2944	Lesvos	Pochi	Serranus cabrilla	3	15
2016-09-22	25.9096	39.2944	Lesvos	Pochi	Serranus cabrilla	1	11
2016-09-22	25.9096	39.2944	Lesvos	Pochi	Serranus cabrilla	1	6
2016-09-22	25.9096	39.2944	Lesvos	Pochi	Serranus scriba	1	14
2016-09-22	25.9096	39.2944	Lesvos	Pochi	Serranus scriba	1	10
2016-09-22	25.9096	39.2944	Lesvos	Pochi	Sparisoma cretense	1	17
2016-09-22	25.9096	39.2944	Lesvos	Pochi	Scorpaena notata	3	8
2016-09-22	25.9096	39.2944	Lesvos	Pochi	Spondyliosoma cantharus	1	12
2016-09-22	25.9096	39.2944	Lesvos	Pochi	Diplodus vulgaris	1	8
2016-09-22	25.9096	39.2944	Lesvos	Pochi	Diplodus vulgaris	9	13
2016-09-22	25.9096	39.2944	Lesvos	Pochi	Diplodus vulgaris	8	10
2016-09-22	25.9096	39.2944	Lesvos	Pochi	Diplodus vulgaris	11	5
2016-09-22	25.9096	39.2944	Lesvos	Pochi	Diplodus vulgaris	4	15
2016-09-22	25.9096	39.2944	Lesvos	Pochi	Diplodus puntazzo	1	13
2016-09-22	25.9096	39.2944	Lesvos	Pochi	Serranus cabrilla	1	12
2016-09-22	25.9096	39.2944	Lesvos	Pochi	Serranus scriba	1	13
2016-09-22	25.9096	39.2944	Lesvos	Pochi	Serranus scriba	1	11
2016-09-22	25.9096	39.2944	Lesvos	Pochi	Diplodus sargus	1	16
2016-09-22	25.9096	39.2944	Lesvos	Pochi	Diplodus vulgaris	7	12
2016-09-22	25.9096	39.2944	Lesvos	Pochi	Diplodus vulgaris	11	9
2016-09-22	25.9096	39.2944	Lesvos	Pochi	Diplodus vulgaris	4	6
2016-09-22	25.9096	39.2944	Lesvos	Pochi	Diplodus puntazzo	1	8
2016-09-22	25.9096	39.2944	Lesvos	Pochi	Serranus cabrilla	2	11
2016-09-22	25.9096	39.2944	Lesvos	Pochi	Serranus cabrilla	3	13
2016-09-22	25.9096	39.2944	Lesvos	Pochi	Serranus scriba	1	13
2016-09-22	25.9096	39.2944	Lesvos	Pochi	Serranus scriba	3	12
2016-09-22	25.9096	39.2944	Lesvos	Pochi	Serranus scriba	3	14
2016-09-22	25.9096	39.2944	Lesvos	Pochi	Spondyliosoma cantharus	5	9
2016-09-22	25.9096	39.2944	Lesvos	Pochi	Dentex dentex	1	30
2016-10-12	24.9645	37.4149	Syros	kremasti azo	Diplodus vulgaris	1	8
2016-10-12	24.9645	37.4149	Syros	kremasti azo	Diplodus vulgaris	3	5
2016-10-12	24.9645	37.4149	Syros	kremasti azo	Diplodus vulgaris	5	10
2016-10-12	24.9645	37.4149	Syros	kremasti azo	Serranus cabrilla	2	8
2016-10-12	24.9645	37.4149	Syros	kremasti azo	Siganus luridus	5	14
2016-10-12	24.9645	37.4149	Syros	kremasti azo	Siganus luridus	4	13
2016-10-12	24.9645	37.4149	Syros	kremasti azo	Epinephelus costae	1	8
2016-10-12	24.9645	37.4149	Syros	kremasti azo	Muraena helena	1	mikri
2016-10-12	24.9645	37.4149	Syros	kremasti azo	Diplodus sargus	1	11
2016-10-12	24.9645	37.4149	Syros	kremasti azo	Diplodus vulgaris	3	6
2016-10-12	24.9645	37.4149	Syros	kremasti azo	Diplodus vulgaris	6	13
2016-10-12	24.9645	37.4149	Syros	kremasti azo	Mullus surmuletus	1	7
2016-10-12	24.9645	37.4149	Syros	kremasti azo	Mullus surmuletus	1	12
2016-10-12	24.9645	37.4149	Syros	kremasti azo	Serranus scriba	1	9
2016-10-12	24.9645	37.4149	Syros	kremasti azo	Siganus luridus	8	13
2016-10-12	24.9645	37.4149	Syros	kremasti azo	Siganus luridus	2	15
2016-10-12	24.9645	37.4149	Syros	kremasti azo	Diplodus annularis	1	8
2016-10-12	24.9645	37.4149	Syros	kremasti azo	Diplodus vulgaris	2	12
2016-10-12	24.9645	37.4149	Syros	kremasti azo	Diplodus vulgaris	3	7
2016-10-12	24.9645	37.4149	Syros	kremasti azo	Mullus surmuletus	1	11
2016-10-12	24.9645	37.4149	Syros	kremasti azo	Serranus cabrilla	1	9
2016-10-12	24.9645	37.4149	Syros	kremasti azo	Serranus scriba	1	9
2016-10-12	24.9645	37.4149	Syros	kremasti azo	Serranus scriba	1	13
2016-10-12	24.9645	37.4149	Syros	kremasti azo	Sparisoma cretense	1	14
2016-10-12	24.9645	37.4149	Syros	kremasti azo	Sparisoma cretense	1	11
2016-10-12	24.9645	37.4149	Syros	kremasti azo	Siganus luridus	8	14
2016-10-12	24.9645	37.4149	Syros	kremasti azo	Siganus luridus	3	16
2016-10-12	24.9645	37.4149	Syros	kremasti azo	Siganus luridus	4	10
2016-10-12	24.9645	37.4149	Syros	kremasti azo	Epinephelus costae	1	14
2016-10-13	24.7517	37.5822	Giaros	Glaronisi Giaros	Diplodus sargus	1	12
2016-10-13	24.7517	37.5822	Giaros	Glaronisi Giaros	Diplodus vulgaris	3	14
2016-10-13	24.7517	37.5822	Giaros	Glaronisi Giaros	Diplodus vulgaris	14	15
2016-10-13	24.7517	37.5822	Giaros	Glaronisi Giaros	Diplodus vulgaris	1	17
2016-10-13	24.7517	37.5822	Giaros	Glaronisi Giaros	Epinephelus costae	1	15
2016-10-13	24.7517	37.5822	Giaros	Glaronisi Giaros	Sarpa salpa	10	7
2016-10-13	24.7517	37.5822	Giaros	Glaronisi Giaros	Sparisoma cretense	8	14
2016-10-13	24.7517	37.5822	Giaros	Glaronisi Giaros	Sparisoma cretense	1	16
2016-10-13	24.7517	37.5822	Giaros	Glaronisi Giaros	Sparisoma cretense	5	15
2016-10-13	24.7517	37.5822	Giaros	Glaronisi Giaros	Siganus luridus	7	15
2016-10-13	24.7517	37.5822	Giaros	Glaronisi Giaros	Siganus luridus	1	16
2016-10-13	24.7517	37.5822	Giaros	Glaronisi Giaros	Siganus luridus	5	15
2016-10-13	24.7517	37.5822	Giaros	Glaronisi Giaros	Siganus rivulatus	1	16
2016-10-13	24.7517	37.5822	Giaros	Glaronisi Giaros	Diplodus vulgaris	1	12
2016-10-13	24.7517	37.5822	Giaros	Glaronisi Giaros	Serranus cabrilla	1	12
2016-10-13	24.7517	37.5822	Giaros	Glaronisi Giaros	Sarpa salpa	14	15
2016-10-13	24.7517	37.5822	Giaros	Glaronisi Giaros	Sarpa salpa	7	10
2016-10-13	24.7517	37.5822	Giaros	Glaronisi Giaros	Sparisoma cretense	8	12
2016-10-13	24.7517	37.5822	Giaros	Glaronisi Giaros	Sparisoma cretense	7	16
2016-10-13	24.7517	37.5822	Giaros	Glaronisi Giaros	Siganus luridus	6	15
2016-10-13	24.7517	37.5822	Giaros	Glaronisi Giaros	Siganus luridus	7	13
2016-10-13	24.7517	37.5822	Giaros	Glaronisi Giaros	Siganus rivulatus	1	14
2016-10-13	24.7517	37.5822	Giaros	Glaronisi Giaros	Epinephelus costae	1	8
2016-10-13	24.7517	37.5822	Giaros	Glaronisi Giaros	Diplodus vulgaris	5	13
2016-10-13	24.7517	37.5822	Giaros	Glaronisi Giaros	Diplodus vulgaris	1	18
2016-10-13	24.7517	37.5822	Giaros	Glaronisi Giaros	Diplodus puntazzo	1	17
2016-10-13	24.7517	37.5822	Giaros	Glaronisi Giaros	Oblada melanura	5	14
2016-10-13	24.7517	37.5822	Giaros	Glaronisi Giaros	Serranus cabrilla	1	13
2016-10-13	24.7517	37.5822	Giaros	Glaronisi Giaros	Sarpa salpa	5	16
2016-10-13	24.7517	37.5822	Giaros	Glaronisi Giaros	Sarpa salpa	3	14
2016-10-13	24.7517	37.5822	Giaros	Glaronisi Giaros	Sparisoma cretense	1	18
2016-10-13	24.7517	37.5822	Giaros	Glaronisi Giaros	Sparisoma cretense	3	14
2016-10-13	24.7517	37.5822	Giaros	Glaronisi Giaros	Siganus luridus	4	16
2016-10-13	24.7517	37.5822	Giaros	Glaronisi Giaros	Siganus luridus	5	10
2016-10-13	24.7517	37.5822	Giaros	Glaronisi Giaros	Epinephelus costae	1	15
2016-10-13	24.7517	37.5822	Giaros	Glaronisi Giaros	Diplodus sargus	1	19
2016-10-13	24.7517	37.5822	Giaros	Glaronisi Giaros	Diplodus sargus	2	13
2016-10-13	24.7517	37.5822	Giaros	Glaronisi Giaros	Diplodus vulgaris	4	12
2016-10-13	24.7517	37.5822	Giaros	Glaronisi Giaros	Diplodus vulgaris	3	11
2016-10-13	24.7517	37.5822	Giaros	Glaronisi Giaros	Oblada melanura	14	10
2016-10-13	24.7517	37.5822	Giaros	Glaronisi Giaros	Oblada melanura	3	12
2016-10-13	24.7517	37.5822	Giaros	Glaronisi Giaros	Serranus scriba	1	12
2016-10-13	24.7517	37.5822	Giaros	Glaronisi Giaros	Serranus scriba	3	11
2016-10-13	24.7517	37.5822	Giaros	Glaronisi Giaros	Sparisoma cretense	1	20
2016-10-13	24.7517	37.5822	Giaros	Glaronisi Giaros	Sparisoma cretense	8	15
2016-10-13	24.7517	37.5822	Giaros	Glaronisi Giaros	Sparisoma cretense	1	22
2016-10-13	24.7517	37.5822	Giaros	Glaronisi Giaros	Sparisoma cretense	1	25
2016-10-13	24.7517	37.5822	Giaros	Glaronisi Giaros	Sparisoma cretense	4	18
2016-10-13	24.7517	37.5822	Giaros	Glaronisi Giaros	Siganus luridus	1	15
2016-10-13	24.7517	37.5822	Giaros	Glaronisi Giaros	Siganus luridus	5	9
2016-10-13	24.7517	37.5822	Giaros	Glaronisi Giaros	Siganus luridus	3	14
2016-10-13	24.7517	37.5822	Giaros	Glaronisi Giaros	Epinephelus costae	1	6
2016-10-13	24.7517	37.5822	Giaros	Glaronisi Giaros	Epinephelus costae	1	13
2016-10-13	24.7517	37.5822	Giaros	Glaronisi Giaros	Diplodus sargus	2	14
2016-10-13	24.7517	37.5822	Giaros	Glaronisi Giaros	Diplodus vulgaris	5	13
2016-10-13	24.7517	37.5822	Giaros	Glaronisi Giaros	Serranus scriba	1	15
2016-10-13	24.7517	37.5822	Giaros	Glaronisi Giaros	Sparisoma cretense	2	20
2016-10-13	24.7517	37.5822	Giaros	Glaronisi Giaros	Sparisoma cretense	4	17
2016-10-13	24.7517	37.5822	Giaros	Glaronisi Giaros	Sparisoma cretense	1	21
2016-10-13	24.7517	37.5822	Giaros	Glaronisi Giaros	Diplodus vulgaris	3	18
2016-10-13	24.7517	37.5822	Giaros	Glaronisi Giaros	Diplodus vulgaris	5	14
2016-10-13	24.7517	37.5822	Giaros	Glaronisi Giaros	Diplodus vulgaris	5	16
2016-10-13	24.7517	37.5822	Giaros	Glaronisi Giaros	Diplodus vulgaris	10	13
2016-10-13	24.7517	37.5822	Giaros	Glaronisi Giaros	Serranus cabrilla	1	10
2016-10-13	24.7517	37.5822	Giaros	Glaronisi Giaros	Serranus scriba	1	13
2016-10-13	24.7517	37.5822	Giaros	Glaronisi Giaros	Sparisoma cretense	1	25
2016-10-13	24.7517	37.5822	Giaros	Glaronisi Giaros	Sparisoma cretense	3	17
2016-10-13	24.7517	37.5822	Giaros	Glaronisi Giaros	Sparisoma cretense	1	27
2016-10-13	24.7517	37.5822	Giaros	Glaronisi Giaros	Sparisoma cretense	5	10
2016-10-13	24.7517	37.5822	Giaros	Glaronisi Giaros	Siganus luridus	2	15
2016-10-13	24.7517	37.5822	Giaros	Glaronisi Giaros	Siganus luridus	7	10
2016-10-13	24.7517	37.5822	Giaros	Glaronisi Giaros	Siganus luridus	4	9
2016-10-13	24.7517	37.5822	Giaros	Glaronisi Giaros	Epinephelus costae	4	30
2016-10-13	24.7517	37.5822	Giaros	Glaronisi Giaros	Epinephelus costae	1	35
2016-10-13	24.7517	37.5822	Giaros	Glaronisi Giaros	Epinephelus marginatus	1	50
2016-10-13	24.7076	37.5934	Giaros	Giaros 2	Diplodus sargus	3	15
2016-10-13	24.7076	37.5934	Giaros	Giaros 2	Diplodus vulgaris	6	13
2016-10-13	24.7076	37.5934	Giaros	Giaros 2	Diplodus vulgaris	8	15
2016-10-13	24.7076	37.5934	Giaros	Giaros 2	Diplodus vulgaris	3	17
2016-10-13	24.7076	37.5934	Giaros	Giaros 2	Serranus cabrilla	1	12
2016-10-13	24.7076	37.5934	Giaros	Giaros 2	Serranus cabrilla	1	14
2016-10-13	24.7076	37.5934	Giaros	Giaros 2	Sparisoma cretense	4	12
2016-10-13	24.7076	37.5934	Giaros	Giaros 2	Sparisoma cretense	2	18
2016-10-13	24.7076	37.5934	Giaros	Giaros 2	Sparisoma cretense	1	22
2016-10-13	24.7076	37.5934	Giaros	Giaros 2	Siganus luridus	5	16
2016-10-13	24.7076	37.5934	Giaros	Giaros 2	Siganus luridus	3	17
2016-10-13	24.7076	37.5934	Giaros	Giaros 2	Diplodus vulgaris	3	7
2016-10-13	24.7076	37.5934	Giaros	Giaros 2	Diplodus vulgaris	5	14
2016-10-13	24.7076	37.5934	Giaros	Giaros 2	Oblada melanura	10	16
2016-10-13	24.7076	37.5934	Giaros	Giaros 2	Mullus surmuletus	1	14
2016-10-13	24.7076	37.5934	Giaros	Giaros 2	Serranus cabrilla	1	11
2016-10-13	24.7076	37.5934	Giaros	Giaros 2	Sparisoma cretense	1	25
2016-10-13	24.7076	37.5934	Giaros	Giaros 2	Sparisoma cretense	3	20
2016-10-13	24.7076	37.5934	Giaros	Giaros 2	Sparisoma cretense	6	15
2016-10-13	24.7076	37.5934	Giaros	Giaros 2	Siganus luridus	4	15
2016-10-13	24.7076	37.5934	Giaros	Giaros 2	Siganus luridus	2	10
2016-10-13	24.7076	37.5934	Giaros	Giaros 2	Epinephelus costae	1	25
2016-10-13	24.7076	37.5934	Giaros	Giaros 2	Epinephelus costae	2	20
2016-10-13	24.7076	37.5934	Giaros	Giaros 2	Epinephelus costae	1	19
2016-10-13	24.7076	37.5934	Giaros	Giaros 2	Spondyliosoma cantharus	2	13
2016-10-13	24.7076	37.5934	Giaros	Giaros 2	Diplodus vulgaris	1	17
2016-10-13	24.7076	37.5934	Giaros	Giaros 2	Diplodus vulgaris	4	16
2016-10-13	24.7076	37.5934	Giaros	Giaros 2	Diplodus puntazzo	1	18
2016-10-13	24.7076	37.5934	Giaros	Giaros 2	Oblada melanura	17	15
2016-10-13	24.7076	37.5934	Giaros	Giaros 2	Serranus cabrilla	1	11
2016-10-13	24.7076	37.5934	Giaros	Giaros 2	Serranus cabrilla	1	13
2016-10-13	24.7076	37.5934	Giaros	Giaros 2	Sparisoma cretense	4	10
2016-10-13	24.7076	37.5934	Giaros	Giaros 2	Sparisoma cretense	1	30
2016-10-13	24.7076	37.5934	Giaros	Giaros 2	Sparisoma cretense	1	22
2016-10-13	24.7076	37.5934	Giaros	Giaros 2	Siganus luridus	20	16
2016-10-13	24.7076	37.5934	Giaros	Giaros 2	Epinephelus costae	4	16
2016-10-13	24.7076	37.5934	Giaros	Giaros 2	Epinephelus costae	2	18
2016-10-13	24.7076	37.5934	Giaros	Giaros 2	Epinephelus costae	1	20
2016-10-13	24.7076	37.5934	Giaros	Giaros 2	Diplodus sargus	2	13
2016-10-13	24.7076	37.5934	Giaros	Giaros 2	Diplodus vulgaris	1	14
2016-10-13	24.7076	37.5934	Giaros	Giaros 2	Oblada melanura	15	18
2016-10-13	24.7076	37.5934	Giaros	Giaros 2	Sarpa salpa	4	17
2016-10-13	24.7076	37.5934	Giaros	Giaros 2	Sparisoma cretense	2	25
2016-10-13	24.7076	37.5934	Giaros	Giaros 2	Sparisoma cretense	4	17
2016-10-13	24.7076	37.5934	Giaros	Giaros 2	Sparisoma cretense	8	14
2016-10-13	24.7076	37.5934	Giaros	Giaros 2	Siganus luridus	1	17
2016-10-13	24.7076	37.5934	Giaros	Giaros 2	Siganus luridus	8	15
2016-10-13	24.7076	37.5934	Giaros	Giaros 2	Diplodus sargus	5	13
2016-10-13	24.7076	37.5934	Giaros	Giaros 2	Diplodus vulgaris	4	15
2016-10-13	24.7076	37.5934	Giaros	Giaros 2	Diplodus vulgaris	3	14
2016-10-13	24.7076	37.5934	Giaros	Giaros 2	Mullus surmuletus	1	12
2016-10-13	24.7076	37.5934	Giaros	Giaros 2	Epinephelus marginatus	1	15
2016-10-13	24.7076	37.5934	Giaros	Giaros 2	Serranus cabrilla	1	13
2016-10-13	24.7076	37.5934	Giaros	Giaros 2	Sparisoma cretense	1	24
2016-10-13	24.7076	37.5934	Giaros	Giaros 2	Sparisoma cretense	2	18
2016-10-13	24.7076	37.5934	Giaros	Giaros 2	Siganus luridus	3	9
2016-10-13	24.7076	37.5934	Giaros	Giaros 2	Siganus luridus	10	15
2016-10-13	24.7076	37.5934	Giaros	Giaros 2	Diplodus vulgaris	6	13
2016-10-13	24.7076	37.5934	Giaros	Giaros 2	Diplodus vulgaris	2	15
2016-10-13	24.7076	37.5934	Giaros	Giaros 2	Diplodus puntazzo	1	15
2016-10-13	24.7076	37.5934	Giaros	Giaros 2	Oblada melanura	4	14
2016-10-13	24.7076	37.5934	Giaros	Giaros 2	Siganus luridus	1	14
2016-10-13	24.7076	37.5934	Giaros	Giaros 2	Epinephelus costae	1	15
2016-10-15	26.9859	36.9253	Kalymnos	kalymnos pothi	Serranus cabrilla	1	13
2016-10-15	26.9859	36.9253	Kalymnos	kalymnos pothi	Serranus scriba	1	14
2016-10-15	26.9859	36.9253	Kalymnos	kalymnos pothi	Sparisoma cretense	3	18
2016-10-15	26.9859	36.9253	Kalymnos	kalymnos pothi	Sparisoma cretense	3	16
2016-10-15	26.9859	36.9253	Kalymnos	kalymnos pothi	Siganus luridus	5	16
2016-10-15	26.9859	36.9253	Kalymnos	kalymnos pothi	Siganus rivulatus	12	15
2016-10-15	26.9859	36.9253	Kalymnos	kalymnos pothi	Diplodus vulgaris	4	10
2016-10-15	26.9859	36.9253	Kalymnos	kalymnos pothi	Diplodus vulgaris	1	9
2016-10-15	26.9859	36.9253	Kalymnos	kalymnos pothi	Oblada melanura	12	14
2016-10-15	26.9859	36.9253	Kalymnos	kalymnos pothi	Serranus scriba	1	14
2016-10-15	26.9859	36.9253	Kalymnos	kalymnos pothi	Sarpa salpa	10	14
2016-10-15	26.9859	36.9253	Kalymnos	kalymnos pothi	Sparisoma cretense	4	10
2016-10-15	26.9859	36.9253	Kalymnos	kalymnos pothi	Siganus luridus	5	14
2016-10-15	26.9859	36.9253	Kalymnos	kalymnos pothi	Siganus rivulatus	1	13
2016-10-15	26.9859	36.9253	Kalymnos	kalymnos pothi	Diplodus vulgaris	1	10
2016-10-15	26.9859	36.9253	Kalymnos	kalymnos pothi	Serranus cabrilla	1	12
2016-10-15	26.9859	36.9253	Kalymnos	kalymnos pothi	Sarpa salpa	5	14
2016-10-15	26.9859	36.9253	Kalymnos	kalymnos pothi	Sparisoma cretense	3	13
2016-10-15	26.9859	36.9253	Kalymnos	kalymnos pothi	Sparisoma cretense	1	10
2016-10-15	26.9859	36.9253	Kalymnos	kalymnos pothi	Sparisoma cretense	1	15
2016-10-15	26.9859	36.9253	Kalymnos	kalymnos pothi	Siganus luridus	6	15
2016-10-15	26.9859	36.9253	Kalymnos	kalymnos pothi	Siganus rivulatus	1	16
2016-10-15	26.9859	36.9253	Kalymnos	kalymnos pothi	Siganus rivulatus	4	14
2016-10-15	26.9859	36.9253	Kalymnos	kalymnos pothi	Sparisoma cretense	1	10
2016-10-15	26.9859	36.9253	Kalymnos	kalymnos pothi	Siganus rivulatus	3	15
2016-10-15	26.9859	36.9253	Kalymnos	kalymnos pothi	Diplodus vulgaris	1	11
2016-10-15	26.9859	36.9253	Kalymnos	kalymnos pothi	Oblada melanura	10	7
2016-10-15	26.9859	36.9253	Kalymnos	kalymnos pothi	Sarpa salpa	9	10
2016-10-15	26.9859	36.9253	Kalymnos	kalymnos pothi	Sparisoma cretense	2	11
2016-10-15	26.9859	36.9253	Kalymnos	kalymnos pothi	Sparisoma cretense	1	15
2016-10-15	26.9859	36.9253	Kalymnos	kalymnos pothi	Sparisoma cretense	1	8
2016-10-15	26.9859	36.9253	Kalymnos	kalymnos pothi	Sparisoma cretense	2	6
2016-10-15	26.9859	36.9253	Kalymnos	kalymnos pothi	Siganus luridus	2	14
2016-10-15	26.9859	36.9253	Kalymnos	kalymnos pothi	Siganus luridus	3	11
2016-10-15	26.9859	36.9253	Kalymnos	kalymnos pothi	Siganus rivulatus	8	13
2016-10-15	27.0362	36.9727	Kalymnos	kalymnos vathi	Diplodus sargus	1	9
2016-10-15	27.0362	36.9727	Kalymnos	kalymnos vathi	Diplodus vulgaris	1	11
2016-10-15	27.0362	36.9727	Kalymnos	kalymnos vathi	Diplodus vulgaris	1	13
2016-10-15	27.0362	36.9727	Kalymnos	kalymnos vathi	Serranus cabrilla	1	15
2016-10-15	27.0362	36.9727	Kalymnos	kalymnos vathi	Serranus scriba	1	12
2016-10-15	27.0362	36.9727	Kalymnos	kalymnos vathi	Serranus scriba	1	14
2016-10-15	27.0362	36.9727	Kalymnos	kalymnos vathi	Epinephelus costae	1	20
2016-10-15	27.0362	36.9727	Kalymnos	kalymnos vathi	Epinephelus costae	1	13
2016-10-15	27.0362	36.9727	Kalymnos	kalymnos vathi	Diplodus annularis	1	8
2016-10-15	27.0362	36.9727	Kalymnos	kalymnos vathi	Diplodus annularis	1	13
2016-10-15	27.0362	36.9727	Kalymnos	kalymnos vathi	Diplodus vulgaris	1	12
2016-10-15	27.0362	36.9727	Kalymnos	kalymnos vathi	Diplodus puntazzo	1	14
2016-10-15	27.0362	36.9727	Kalymnos	kalymnos vathi	Diplodus puntazzo	1	12
2016-10-15	27.0362	36.9727	Kalymnos	kalymnos vathi	Mullus surmuletus	1	12
2016-10-15	27.0362	36.9727	Kalymnos	kalymnos vathi	Mullus surmuletus	1	13
2016-10-15	27.0362	36.9727	Kalymnos	kalymnos vathi	Serranus scriba	1	11
2016-10-15	27.0362	36.9727	Kalymnos	kalymnos vathi	Serranus scriba	2	13
2016-10-15	27.0362	36.9727	Kalymnos	kalymnos vathi	Serranus scriba	1	14
2016-10-15	27.0362	36.9727	Kalymnos	kalymnos vathi	Diplodus vulgaris	1	11
2016-10-15	27.0362	36.9727	Kalymnos	kalymnos vathi	Diplodus vulgaris	5	12
2016-10-15	27.0362	36.9727	Kalymnos	kalymnos vathi	Siganus luridus	1	18
2016-10-15	27.0362	36.9727	Kalymnos	kalymnos vathi	Siganus luridus	2	15
2016-10-15	27.0362	36.9727	Kalymnos	kalymnos vathi	Siganus rivulatus	7	16
2016-10-15	27.0362	36.9727	Kalymnos	kalymnos vathi	Diplodus annularis	5	9
2016-10-15	27.0362	36.9727	Kalymnos	kalymnos vathi	Diplodus vulgaris	1	9
2016-10-15	27.0362	36.9727	Kalymnos	kalymnos vathi	Diplodus vulgaris	1	13
2016-10-15	27.0362	36.9727	Kalymnos	kalymnos vathi	Diplodus sargus	1	8
2016-10-15	27.0362	36.9727	Kalymnos	kalymnos vathi	Diplodus sargus	1	7
2016-10-15	27.0362	36.9727	Kalymnos	kalymnos vathi	Mullus surmuletus	1	13
2016-10-15	27.0362	36.9727	Kalymnos	kalymnos vathi	Serranus scriba	2	15
2016-10-15	27.0362	36.9727	Kalymnos	kalymnos vathi	Serranus scriba	1	13
2016-10-15	27.0362	36.9727	Kalymnos	kalymnos vathi	Serranus scriba	1	10
2016-10-15	27.0362	36.9727	Kalymnos	kalymnos vathi	Sarpa salpa	15	11
2016-10-15	27.0362	36.9727	Kalymnos	kalymnos vathi	Sarpa salpa	1	15
2016-10-15	27.0362	36.9727	Kalymnos	kalymnos vathi	Siganus luridus	2	14
2016-10-15	27.0362	36.9727	Kalymnos	kalymnos vathi	Siganus rivulatus	1	11
2016-10-15	27.0362	36.9727	Kalymnos	kalymnos vathi	Siganus rivulatus	4	15
2016-10-15	27.0362	36.9727	Kalymnos	kalymnos vathi	Diplodus annularis	5	8
2016-10-15	27.0362	36.9727	Kalymnos	kalymnos vathi	Diplodus sargus	1	10
2016-10-15	27.0362	36.9727	Kalymnos	kalymnos vathi	Diplodus vulgaris	1	8
2016-10-15	27.0362	36.9727	Kalymnos	kalymnos vathi	Diplodus vulgaris	3	11
2016-10-15	27.0362	36.9727	Kalymnos	kalymnos vathi	Oblada melanura	4	7
2016-10-15	27.0362	36.9727	Kalymnos	kalymnos vathi	Serranus scriba	2	14
2016-10-15	27.0362	36.9727	Kalymnos	kalymnos vathi	Serranus scriba	1	8
2016-10-15	27.0362	36.9727	Kalymnos	kalymnos vathi	Sarpa salpa	7	12
2016-10-15	27.0362	36.9727	Kalymnos	kalymnos vathi	Siganus luridus	1	14
2016-10-15	27.0362	36.9727	Kalymnos	kalymnos vathi	Diplodus annularis	2	8
2016-10-15	27.0362	36.9727	Kalymnos	kalymnos vathi	Diplodus annularis	1	6
2016-10-15	27.0362	36.9727	Kalymnos	kalymnos vathi	Diplodus vulgaris	3	10
2016-10-15	27.0362	36.9727	Kalymnos	kalymnos vathi	Diplodus vulgaris	1	11
2016-10-15	27.0362	36.9727	Kalymnos	kalymnos vathi	Serranus scriba	1	15
2016-10-15	27.0362	36.9727	Kalymnos	kalymnos vathi	Siganus rivulatus	6	14
2016-10-19	25.841	36.835	Amorgos	amporgos katapola	Diplodus sargus	5	14
2016-10-19	25.841	36.835	Amorgos	amporgos katapola	Diplodus vulgaris	9	15
2016-10-19	25.841	36.835	Amorgos	amporgos katapola	Diplodus vulgaris	8	13
2016-10-19	25.841	36.835	Amorgos	amporgos katapola	Diplodus vulgaris	5	16
2016-10-19	25.841	36.835	Amorgos	amporgos katapola	Diplodus puntazzo	1	20
2016-10-19	25.841	36.835	Amorgos	amporgos katapola	Oblada melanura	20	15
2016-10-19	25.841	36.835	Amorgos	amporgos katapola	Oblada melanura	8	10
2016-10-19	25.841	36.835	Amorgos	amporgos katapola	Serranus cabrilla	1	12
2016-10-19	25.841	36.835	Amorgos	amporgos katapola	Serranus scriba	1	11
2016-10-19	25.841	36.835	Amorgos	amporgos katapola	Sparisoma cretense	1	28
2016-10-19	25.841	36.835	Amorgos	amporgos katapola	Sparisoma cretense	4	20
2016-10-19	25.841	36.835	Amorgos	amporgos katapola	Siganus luridus	7	15
2016-10-19	25.841	36.835	Amorgos	amporgos katapola	Siganus rivulatus	20	15
2016-10-19	25.841	36.835	Amorgos	amporgos katapola	Diplodus sargus	1	17
2016-10-19	25.841	36.835	Amorgos	amporgos katapola	Diplodus sargus	1	14
2016-10-19	25.841	36.835	Amorgos	amporgos katapola	Diplodus sargus	1	12
2016-10-19	25.841	36.835	Amorgos	amporgos katapola	Diplodus vulgaris	16	15
2016-10-19	25.841	36.835	Amorgos	amporgos katapola	Diplodus vulgaris	15	9
2016-10-19	25.841	36.835	Amorgos	amporgos katapola	Diplodus vulgaris	5	16
2016-10-19	25.841	36.835	Amorgos	amporgos katapola	Oblada melanura	30	16
2016-10-19	25.841	36.835	Amorgos	amporgos katapola	Serranus cabrilla	1	12
2016-10-19	25.841	36.835	Amorgos	amporgos katapola	Serranus cabrilla	1	14
2016-10-19	25.841	36.835	Amorgos	amporgos katapola	Serranus cabrilla	1	11
2016-10-19	25.841	36.835	Amorgos	amporgos katapola	Sparisoma cretense	1	13
2016-10-19	25.841	36.835	Amorgos	amporgos katapola	Siganus luridus	1	14
2016-10-19	25.841	36.835	Amorgos	amporgos katapola	Siganus luridus	5	13
2016-10-19	25.841	36.835	Amorgos	amporgos katapola	Siganus rivulatus	5	14
2016-10-19	25.841	36.835	Amorgos	amporgos katapola	Diplodus sargus	2	13
2016-10-19	25.841	36.835	Amorgos	amporgos katapola	Diplodus vulgaris	12	14
2016-10-19	25.841	36.835	Amorgos	amporgos katapola	Oblada melanura	5	14
2016-10-19	25.841	36.835	Amorgos	amporgos katapola	Serranus cabrilla	1	12
2016-10-19	25.841	36.835	Amorgos	amporgos katapola	Serranus cabrilla	1	13
2016-10-19	25.841	36.835	Amorgos	amporgos katapola	Serranus scriba	2	11
2016-10-19	25.841	36.835	Amorgos	amporgos katapola	Siganus luridus	9	11
2016-10-19	25.841	36.835	Amorgos	amporgos katapola	Siganus rivulatus	8	15
2016-10-19	25.841	36.835	Amorgos	amporgos katapola	Serranus cabrilla	1	13
2016-10-19	25.841	36.835	Amorgos	amporgos katapola	Siganus luridus	2	15
2016-10-19	25.841	36.835	Amorgos	amporgos katapola	Serranus cabrilla	1	12
2016-10-19	25.841	36.835	Amorgos	amporgos katapola	Siganus luridus	3	16
2016-10-19	25.841	36.835	Amorgos	amporgos katapola	Siganus luridus	5	12
2016-10-19	25.841	36.835	Amorgos	amporgos katapola	Diplodus sargus	1	14
2016-10-19	25.841	36.835	Amorgos	amporgos katapola	Diplodus sargus	1	18
2016-10-19	25.841	36.835	Amorgos	amporgos katapola	Diplodus vulgaris	3	15
2016-10-19	25.841	36.835	Amorgos	amporgos katapola	Serranus cabrilla	1	10
2016-10-19	25.841	36.835	Amorgos	amporgos katapola	Serranus cabrilla	1	14
2016-10-19	25.841	36.835	Amorgos	amporgos katapola	Sarpa salpa	5	13
2016-10-19	25.841	36.835	Amorgos	amporgos katapola	Siganus luridus	2	15
2016-10-19	25.841	36.835	Amorgos	amporgos katapola	Siganus rivulatus	1	15
2016-10-19	25.6856	36.8414	Mikres kyklades	Antikeros	Diplodus sargus	1	13
2016-10-19	25.6856	36.8414	Mikres kyklades	Antikeros	Diplodus vulgaris	2	15
2016-10-19	25.6856	36.8414	Mikres kyklades	Antikeros	Diplodus vulgaris	4	13
2016-10-19	25.6856	36.8414	Mikres kyklades	Antikeros	Serranus cabrilla	3	12
2016-10-19	25.6856	36.8414	Mikres kyklades	Antikeros	Serranus cabrilla	1	14
2016-10-19	25.6856	36.8414	Mikres kyklades	Antikeros	Sparisoma cretense	1	20
2016-10-19	25.6856	36.8414	Mikres kyklades	Antikeros	Sparisoma cretense	4	18
2016-10-19	25.6856	36.8414	Mikres kyklades	Antikeros	Siganus luridus	10	14
2016-10-19	25.6856	36.8414	Mikres kyklades	Antikeros	Serranus cabrilla	2	12
2016-10-19	25.6856	36.8414	Mikres kyklades	Antikeros	Serranus cabrilla	2	13
2016-10-19	25.6856	36.8414	Mikres kyklades	Antikeros	Sparisoma cretense	2	17
2016-10-19	25.6856	36.8414	Mikres kyklades	Antikeros	Sparisoma cretense	1	19
2016-10-19	25.6856	36.8414	Mikres kyklades	Antikeros	Sparisoma cretense	1	22
2016-10-19	25.6856	36.8414	Mikres kyklades	Antikeros	Sparisoma cretense	4	11
2016-10-19	25.6856	36.8414	Mikres kyklades	Antikeros	Sparisoma cretense	1	25
2016-10-19	25.6856	36.8414	Mikres kyklades	Antikeros	Siganus luridus	17	14
2016-10-19	25.6856	36.8414	Mikres kyklades	Antikeros	Siganus luridus	4	15
2016-10-19	25.6856	36.8414	Mikres kyklades	Antikeros	Diplodus sargus	1	15
2016-10-19	25.6856	36.8414	Mikres kyklades	Antikeros	Diplodus sargus	1	13
2016-10-19	25.6856	36.8414	Mikres kyklades	Antikeros	Diplodus vulgaris	7	13
2016-10-19	25.6856	36.8414	Mikres kyklades	Antikeros	Diplodus vulgaris	7	14
2016-10-19	25.6856	36.8414	Mikres kyklades	Antikeros	Serranus cabrilla	3	12
2016-10-19	25.6856	36.8414	Mikres kyklades	Antikeros	Serranus cabrilla	4	11
2016-10-19	25.6856	36.8414	Mikres kyklades	Antikeros	Serranus cabrilla	1	13
2016-10-19	25.6856	36.8414	Mikres kyklades	Antikeros	Sparisoma cretense	1	19
2016-10-19	25.6856	36.8414	Mikres kyklades	Antikeros	Sparisoma cretense	3	14
2016-10-19	25.6856	36.8414	Mikres kyklades	Antikeros	Siganus luridus	6	15
2016-10-19	25.6856	36.8414	Mikres kyklades	Antikeros	Siganus luridus	13	14
2016-10-19	25.6856	36.8414	Mikres kyklades	Antikeros	Serranus cabrilla	1	12
2016-10-19	25.6856	36.8414	Mikres kyklades	Antikeros	Sparisoma cretense	1	19
2016-10-19	25.6856	36.8414	Mikres kyklades	Antikeros	Sparisoma cretense	2	14
2016-10-19	25.6856	36.8414	Mikres kyklades	Antikeros	Sparisoma cretense	1	12
2016-10-19	25.6856	36.8414	Mikres kyklades	Antikeros	Siganus luridus	1	14
2016-10-19	25.6856	36.8414	Mikres kyklades	Antikeros	Serranus cabrilla	1	13
2016-10-19	25.6856	36.8414	Mikres kyklades	Antikeros	Serranus cabrilla	1	14
2016-10-19	25.6856	36.8414	Mikres kyklades	Antikeros	Sparisoma cretense	1	20
2016-10-19	25.6856	36.8414	Mikres kyklades	Antikeros	Sparisoma cretense	2	17
2016-10-19	25.6856	36.8414	Mikres kyklades	Antikeros	Sparisoma cretense	3	15
2016-10-19	25.6856	36.8414	Mikres kyklades	Antikeros	Siganus luridus	2	12
2016-10-19	25.6856	36.8414	Mikres kyklades	Antikeros	Siganus luridus	1	15
2016-10-19	25.6856	36.8414	Mikres kyklades	Antikeros	Diplodus sargus	3	14
2016-10-19	25.6856	36.8414	Mikres kyklades	Antikeros	Diplodus sargus	1	13
2016-10-19	25.6856	36.8414	Mikres kyklades	Antikeros	Diplodus sargus	8	15
2016-10-19	25.6856	36.8414	Mikres kyklades	Antikeros	Diplodus vulgaris	1	13
2016-10-19	25.6856	36.8414	Mikres kyklades	Antikeros	Diplodus vulgaris	1	14
2016-10-19	25.6856	36.8414	Mikres kyklades	Antikeros	Serranus cabrilla	1	14
2016-10-19	25.6856	36.8414	Mikres kyklades	Antikeros	Serranus cabrilla	1	11
2016-10-19	25.6856	36.8414	Mikres kyklades	Antikeros	Serranus cabrilla	1	12
2016-10-19	25.6856	36.8414	Mikres kyklades	Antikeros	Sarpa salpa	25	14
2016-10-19	25.6856	36.8414	Mikres kyklades	Antikeros	Sparisoma cretense	1	20
2016-10-19	25.6856	36.8414	Mikres kyklades	Antikeros	Sparisoma cretense	1	19
2016-10-19	25.6856	36.8414	Mikres kyklades	Antikeros	Sparisoma cretense	2	17
2016-10-19	25.6856	36.8414	Mikres kyklades	Antikeros	Sparisoma cretense	1	11
2016-10-19	25.6856	36.8414	Mikres kyklades	Antikeros	Sparisoma cretense	1	7
2016-10-19	25.6856	36.8414	Mikres kyklades	Antikeros	Siganus luridus	2	15
2016-10-20	25.4801	36.838	Mikres kyklades	Hraklia	Diplodus annularis	1	9
2016-10-20	25.4801	36.838	Mikres kyklades	Hraklia	Oblada melanura	1	15
2016-10-20	25.4801	36.838	Mikres kyklades	Hraklia	Serranus cabrilla	1	9
2016-10-20	25.4801	36.838	Mikres kyklades	Hraklia	Serranus cabrilla	1	13
2016-10-20	25.4801	36.838	Mikres kyklades	Hraklia	Sparisoma cretense	1	24
2016-10-20	25.4801	36.838	Mikres kyklades	Hraklia	Sparisoma cretense	8	19
2016-10-20	25.4801	36.838	Mikres kyklades	Hraklia	Sparisoma cretense	4	15
2016-10-20	25.4801	36.838	Mikres kyklades	Hraklia	Siganus luridus	8	14
2016-10-20	25.4801	36.838	Mikres kyklades	Hraklia	Siganus luridus	3	15
2016-10-20	25.4801	36.838	Mikres kyklades	Hraklia	Siganus luridus	7	12
2016-10-20	25.4801	36.838	Mikres kyklades	Hraklia	Mullus surmuletus	1	12
2016-10-20	25.4801	36.838	Mikres kyklades	Hraklia	Mullus surmuletus	1	11
2016-10-20	25.4801	36.838	Mikres kyklades	Hraklia	Serranus cabrilla	1	12
2016-10-20	25.4801	36.838	Mikres kyklades	Hraklia	Serranus scriba	1	13
2016-10-20	25.4801	36.838	Mikres kyklades	Hraklia	Sparisoma cretense	2	20
2016-10-20	25.4801	36.838	Mikres kyklades	Hraklia	Sparisoma cretense	1	19
2016-10-20	25.4801	36.838	Mikres kyklades	Hraklia	Sparisoma cretense	1	17
2016-10-20	25.4801	36.838	Mikres kyklades	Hraklia	Sparisoma cretense	3	10
2016-10-20	25.4801	36.838	Mikres kyklades	Hraklia	Siganus luridus	30	15
2016-10-20	25.4801	36.838	Mikres kyklades	Hraklia	Siganus luridus	10	14
2016-10-20	25.4801	36.838	Mikres kyklades	Hraklia	Diplodus sargus	1	13
2016-10-20	25.4801	36.838	Mikres kyklades	Hraklia	Diplodus vulgaris	1	12
2016-10-20	25.4801	36.838	Mikres kyklades	Hraklia	Mullus surmuletus	1	13
2016-10-20	25.4801	36.838	Mikres kyklades	Hraklia	Serranus cabrilla	2	12
2016-10-20	25.4801	36.838	Mikres kyklades	Hraklia	Serranus cabrilla	1	7
2016-10-20	25.4801	36.838	Mikres kyklades	Hraklia	Serranus cabrilla	2	11
2016-10-20	25.4801	36.838	Mikres kyklades	Hraklia	Sparisoma cretense	1	18
2016-10-20	25.4801	36.838	Mikres kyklades	Hraklia	Sparisoma cretense	5	19
2016-10-20	25.4801	36.838	Mikres kyklades	Hraklia	Sparisoma cretense	3	7
2016-10-20	25.4801	36.838	Mikres kyklades	Hraklia	Sparisoma cretense	4	6
2016-10-20	25.4801	36.838	Mikres kyklades	Hraklia	Siganus luridus	25	14
2016-10-20	25.4801	36.838	Mikres kyklades	Hraklia	Serranus cabrilla	1	13
2016-10-20	25.4801	36.838	Mikres kyklades	Hraklia	Serranus cabrilla	1	12
2016-10-20	25.4801	36.838	Mikres kyklades	Hraklia	Sarpa salpa	7	15
2016-10-20	25.4801	36.838	Mikres kyklades	Hraklia	Sparisoma cretense	4	19
2016-10-20	25.4801	36.838	Mikres kyklades	Hraklia	Sparisoma cretense	1	17
2016-10-20	25.4801	36.838	Mikres kyklades	Hraklia	Sparisoma cretense	1	15
2016-10-20	25.4801	36.838	Mikres kyklades	Hraklia	Siganus luridus	4	14
2016-10-20	25.4801	36.838	Mikres kyklades	Hraklia	Diplodus sargus	1	14
2016-10-20	25.4801	36.838	Mikres kyklades	Hraklia	Sarpa salpa	5	17
2016-10-20	25.4801	36.838	Mikres kyklades	Hraklia	Sparisoma cretense	1	14
2016-10-20	25.4801	36.838	Mikres kyklades	Hraklia	Siganus luridus	1	15
2016-10-20	25.4801	36.838	Mikres kyklades	Hraklia	Siganus luridus	3	14
2016-10-20	25.4801	36.838	Mikres kyklades	Hraklia	Siganus rivulatus	1	13
2016-10-20	25.4801	36.838	Mikres kyklades	Hraklia	Diplodus sargus	1	13
2016-10-20	25.4801	36.838	Mikres kyklades	Hraklia	Serranus cabrilla	1	12
2016-10-20	25.4801	36.838	Mikres kyklades	Hraklia	Sparisoma cretense	1	17
2016-10-20	25.4801	36.838	Mikres kyklades	Hraklia	Sparisoma cretense	1	18
2016-10-20	25.4801	36.838	Mikres kyklades	Hraklia	Siganus luridus	3	15
2016-10-20	25.4801	36.838	Mikres kyklades	Hraklia	Siganus luridus	6	14
2016-10-20	25.4801	36.838	Mikres kyklades	Hraklia	Siganus luridus	5	11
2016-10-20	25.5228	36.8321	Mikres kyklades	Ofiousa	Diplodus sargus	1	16
2016-10-20	25.5228	36.8321	Mikres kyklades	Ofiousa	Diplodus vulgaris	8	15
2016-10-20	25.5228	36.8321	Mikres kyklades	Ofiousa	Diplodus vulgaris	5	13
2016-10-20	25.5228	36.8321	Mikres kyklades	Ofiousa	Diplodus vulgaris	4	11
2016-10-20	25.5228	36.8321	Mikres kyklades	Ofiousa	Sparisoma cretense	6	17
2016-10-20	25.5228	36.8321	Mikres kyklades	Ofiousa	Sparisoma cretense	1	20
2016-10-20	25.5228	36.8321	Mikres kyklades	Ofiousa	Sparisoma cretense	3	18
2016-10-20	25.5228	36.8321	Mikres kyklades	Ofiousa	Sparisoma cretense	5	11
2016-10-20	25.5228	36.8321	Mikres kyklades	Ofiousa	Siganus luridus	3	14
2016-10-20	25.5228	36.8321	Mikres kyklades	Ofiousa	Diplodus vulgaris	9	14
2016-10-20	25.5228	36.8321	Mikres kyklades	Ofiousa	Diplodus vulgaris	3	15
2016-10-20	25.5228	36.8321	Mikres kyklades	Ofiousa	Diplodus vulgaris	1	16
2016-10-20	25.5228	36.8321	Mikres kyklades	Ofiousa	Serranus cabrilla	2	13
2016-10-20	25.5228	36.8321	Mikres kyklades	Ofiousa	Sparisoma cretense	4	17
2016-10-20	25.5228	36.8321	Mikres kyklades	Ofiousa	Sparisoma cretense	1	20
2016-10-20	25.5228	36.8321	Mikres kyklades	Ofiousa	Sparisoma cretense	1	11
2016-10-20	25.5228	36.8321	Mikres kyklades	Ofiousa	Siganus luridus	14	11
2016-10-20	25.5228	36.8321	Mikres kyklades	Ofiousa	Siganus luridus	2	15
2016-10-20	25.5228	36.8321	Mikres kyklades	Ofiousa	Diplodus sargus	1	14
2016-10-20	25.5228	36.8321	Mikres kyklades	Ofiousa	Diplodus vulgaris	8	12
2016-10-20	25.5228	36.8321	Mikres kyklades	Ofiousa	Diplodus vulgaris	9	15
2016-10-20	25.5228	36.8321	Mikres kyklades	Ofiousa	Serranus cabrilla	3	12
2016-10-20	25.5228	36.8321	Mikres kyklades	Ofiousa	Serranus scriba	1	13
2016-10-20	25.5228	36.8321	Mikres kyklades	Ofiousa	Serranus scriba	1	12
2016-10-20	25.5228	36.8321	Mikres kyklades	Ofiousa	Sparisoma cretense	9	17
2016-10-20	25.5228	36.8321	Mikres kyklades	Ofiousa	Sparisoma cretense	1	19
2016-10-20	25.5228	36.8321	Mikres kyklades	Ofiousa	Sparisoma cretense	3	14
2016-10-20	25.5228	36.8321	Mikres kyklades	Ofiousa	Siganus luridus	11	13
2016-10-20	25.5228	36.8321	Mikres kyklades	Ofiousa	Siganus luridus	1	15
2016-10-20	25.5228	36.8321	Mikres kyklades	Ofiousa	Diplodus vulgaris	2	14
2016-10-20	25.5228	36.8321	Mikres kyklades	Ofiousa	Sparisoma cretense	1	24
2016-10-20	25.5228	36.8321	Mikres kyklades	Ofiousa	Sparisoma cretense	1	17
2016-10-20	25.5228	36.8321	Mikres kyklades	Ofiousa	Sparisoma cretense	1	15
2016-10-20	25.5228	36.8321	Mikres kyklades	Ofiousa	Siganus luridus	6	12
2016-10-20	25.5228	36.8321	Mikres kyklades	Ofiousa	Epinephelus marginatus	1	27
2016-10-20	25.5228	36.8321	Mikres kyklades	Ofiousa	Serranus cabrilla	1	12
2016-10-20	25.5228	36.8321	Mikres kyklades	Ofiousa	Serranus scriba	1	14
2016-10-20	25.5228	36.8321	Mikres kyklades	Ofiousa	Sparisoma cretense	5	18
2016-10-20	25.5228	36.8321	Mikres kyklades	Ofiousa	Sparisoma cretense	2	16
2016-10-20	25.5228	36.8321	Mikres kyklades	Ofiousa	Sparisoma cretense	1	22
2016-10-20	25.5228	36.8321	Mikres kyklades	Ofiousa	Sparisoma cretense	2	20
2016-10-20	25.5228	36.8321	Mikres kyklades	Ofiousa	Siganus luridus	4	13
2016-10-20	25.5228	36.8321	Mikres kyklades	Ofiousa	Siganus luridus	5	14
2016-10-20	25.5228	36.8321	Mikres kyklades	Ofiousa	Diplodus sargus	1	13
2016-10-20	25.5228	36.8321	Mikres kyklades	Ofiousa	Diplodus vulgaris	1	13
2016-10-20	25.5228	36.8321	Mikres kyklades	Ofiousa	Serranus cabrilla	1	11
2016-10-20	25.5228	36.8321	Mikres kyklades	Ofiousa	Sparisoma cretense	2	18
2016-10-20	25.5228	36.8321	Mikres kyklades	Ofiousa	Sparisoma cretense	1	15
2016-10-20	25.5228	36.8321	Mikres kyklades	Ofiousa	Siganus luridus	2	10
2016-10-20	25.5228	36.8321	Mikres kyklades	Ofiousa	Siganus luridus	3	12
2016-10-21	25.2946	37.1418	Paros	Santa maria	Diplodus sargus	1	13
2016-10-21	25.2946	37.1418	Paros	Santa maria	Diplodus sargus	1	15
2016-10-21	25.2946	37.1418	Paros	Santa maria	Diplodus puntazzo	1	12
2016-10-21	25.2946	37.1418	Paros	Santa maria	Sparisoma cretense	5	10
2016-10-21	25.2946	37.1418	Paros	Santa maria	Sparisoma cretense	1	14
2016-10-21	25.2946	37.1418	Paros	Santa maria	Siganus luridus	14	13
2016-10-21	25.2946	37.1418	Paros	Santa maria	Siganus luridus	1	15
2016-10-21	25.2946	37.1418	Paros	Santa maria	Siganus luridus	4	9
2016-10-21	25.2946	37.1418	Paros	Santa maria	Diplodus sargus	1	13
2016-10-21	25.2946	37.1418	Paros	Santa maria	Diplodus sargus	1	16
2016-10-21	25.2946	37.1418	Paros	Santa maria	Diplodus vulgaris	1	12
2016-10-21	25.2946	37.1418	Paros	Santa maria	Diplodus vulgaris	1	13
2016-10-21	25.2946	37.1418	Paros	Santa maria	Mullus surmuletus	1	13
2016-10-21	25.2946	37.1418	Paros	Santa maria	Serranus cabrilla	1	12
2016-10-21	25.2946	37.1418	Paros	Santa maria	Serranus scriba	1	13
2016-10-21	25.2946	37.1418	Paros	Santa maria	Sparisoma cretense	1	17
2016-10-21	25.2946	37.1418	Paros	Santa maria	Siganus luridus	5	9
2016-10-21	25.2946	37.1418	Paros	Santa maria	Siganus luridus	4	14
2016-10-21	25.2946	37.1418	Paros	Santa maria	Epinephelus costae	1	17
2016-10-21	25.2946	37.1418	Paros	Santa maria	Diplodus vulgaris	1	12
2016-10-21	25.2946	37.1418	Paros	Santa maria	Mullus surmuletus	2	11
2016-10-21	25.2946	37.1418	Paros	Santa maria	Mullus surmuletus	1	13
2016-10-21	25.2946	37.1418	Paros	Santa maria	Serranus scriba	1	14
2016-10-21	25.2946	37.1418	Paros	Santa maria	Sparisoma cretense	1	9
2016-10-21	25.2946	37.1418	Paros	Santa maria	Siganus luridus	7	14
2016-10-21	25.2946	37.1418	Paros	Santa maria	Diplodus vulgaris	1	13
2016-10-21	25.2946	37.1418	Paros	Santa maria	Serranus cabrilla	1	13
2016-10-21	25.2946	37.1418	Paros	Santa maria	Siganus luridus	6	15
2016-10-21	25.2946	37.1418	Paros	Santa maria	Sarpa salpa	20	15
2016-10-21	25.2946	37.1418	Paros	Santa maria	Siganus luridus	3	14
2016-10-21	25.2946	37.1418	Paros	Santa maria	Diplodus sargus	1	13
2016-10-21	25.2946	37.1418	Paros	Santa maria	Diplodus sargus	1	14
2016-10-21	25.2946	37.1418	Paros	Santa maria	Sarpa salpa	7	15
2016-10-21	25.2946	37.1418	Paros	Santa maria	Sparisoma cretense	3	12
2016-10-21	25.2946	37.1418	Paros	Santa maria	Sparisoma cretense	3	10
2016-10-21	25.2946	37.1418	Paros	Santa maria	Siganus luridus	4	15
2016-10-21	25.2962	37.1495	Paros	Ovriokastro	Diplodus vulgaris	2	12
2016-10-21	25.2962	37.1495	Paros	Ovriokastro	Diplodus vulgaris	1	14
2016-10-21	25.2962	37.1495	Paros	Ovriokastro	Serranus cabrilla	1	11
2016-10-21	25.2962	37.1495	Paros	Ovriokastro	Sparisoma cretense	1	20
2016-10-21	25.2962	37.1495	Paros	Ovriokastro	Sparisoma cretense	1	17
2016-10-21	25.2962	37.1495	Paros	Ovriokastro	Siganus luridus	3	14
2016-10-21	25.2962	37.1495	Paros	Ovriokastro	Siganus luridus	7	15
2016-10-21	25.2962	37.1495	Paros	Ovriokastro	Diplodus sargus	1	14
2016-10-21	25.2962	37.1495	Paros	Ovriokastro	Diplodus vulgaris	1	13
2016-10-21	25.2962	37.1495	Paros	Ovriokastro	Serranus cabrilla	2	12
2016-10-21	25.2962	37.1495	Paros	Ovriokastro	Siganus luridus	2	14
2016-10-21	25.2962	37.1495	Paros	Ovriokastro	Diplodus sargus	1	13
2016-10-21	25.2962	37.1495	Paros	Ovriokastro	Diplodus vulgaris	8	14
2016-10-21	25.2962	37.1495	Paros	Ovriokastro	Diplodus vulgaris	1	15
2016-10-21	25.2962	37.1495	Paros	Ovriokastro	Diplodus vulgaris	3	12
2016-10-21	25.2962	37.1495	Paros	Ovriokastro	Serranus cabrilla	1	11
2016-10-21	25.2962	37.1495	Paros	Ovriokastro	Serranus scriba	1	10
2016-10-21	25.2962	37.1495	Paros	Ovriokastro	Serranus scriba	1	12
2016-10-21	25.2962	37.1495	Paros	Ovriokastro	Sparisoma cretense	1	22
2016-10-21	25.2962	37.1495	Paros	Ovriokastro	Sparisoma cretense	9	11
2016-10-21	25.2962	37.1495	Paros	Ovriokastro	Siganus luridus	3	14
2016-10-21	25.2962	37.1495	Paros	Ovriokastro	Diplodus sargus	1	11
2016-10-21	25.2962	37.1495	Paros	Ovriokastro	Diplodus vulgaris	1	10
2016-10-21	25.2962	37.1495	Paros	Ovriokastro	Sparisoma cretense	3	12
2016-10-21	25.2962	37.1495	Paros	Ovriokastro	Sparisoma cretense	3	18
2016-10-21	25.2962	37.1495	Paros	Ovriokastro	Siganus luridus	2	14
2016-10-21	25.2962	37.1495	Paros	Ovriokastro	Siganus luridus	3	15
2016-10-21	25.2962	37.1495	Paros	Ovriokastro	Siganus rivulatus	1	15
2016-10-21	25.2962	37.1495	Paros	Ovriokastro	Diplodus vulgaris	3	12
2016-10-21	25.2962	37.1495	Paros	Ovriokastro	Sparisoma cretense	5	13
2016-10-21	25.2962	37.1495	Paros	Ovriokastro	Sparisoma cretense	1	15
2016-10-21	25.2962	37.1495	Paros	Ovriokastro	Siganus luridus	4	12
2016-10-21	25.2962	37.1495	Paros	Ovriokastro	Siganus luridus	1	15
2016-10-21	25.2962	37.1495	Paros	Ovriokastro	Siganus rivulatus	1	16
2016-10-21	25.2962	37.1495	Paros	Ovriokastro	Diplodus sargus	1	13
2016-10-21	25.2962	37.1495	Paros	Ovriokastro	Serranus scriba	1	12
2016-10-21	25.2962	37.1495	Paros	Ovriokastro	Sparisoma cretense	3	14
2016-10-21	25.2962	37.1495	Paros	Ovriokastro	Sparisoma cretense	1	15
2016-10-21	25.2962	37.1495	Paros	Ovriokastro	Siganus luridus	7	14
2016-10-21	25.2962	37.1495	Paros	Ovriokastro	Siganus rivulatus	1	15
2016-10-21	25.2962	37.1495	Paros	Ovriokastro	Siganus rivulatus	1	14
2016-10-21	25.2962	37.1495	Paros	Ovriokastro	Epinephelus costae	1	20
2016-10-22	24.8936	37.5084	Syros	North Syros	Diplodus vulgaris	2	12
2016-10-22	24.8936	37.5084	Syros	North Syros	Serranus cabrilla	1	11
2016-10-22	24.8936	37.5084	Syros	North Syros	Serranus cabrilla	1	9
2016-10-22	24.8936	37.5084	Syros	North Syros	Serranus scriba	1	12
2016-10-22	24.8936	37.5084	Syros	North Syros	Sparisoma cretense	2	10
2016-10-22	24.8936	37.5084	Syros	North Syros	Siganus luridus	1	14
2016-10-22	24.8936	37.5084	Syros	North Syros	Siganus luridus	2	10
2016-10-22	24.8936	37.5084	Syros	North Syros	Epinephelus costae	1	15
2016-10-22	24.8936	37.5084	Syros	North Syros	Diplodus sargus	1	12
2016-10-22	24.8936	37.5084	Syros	North Syros	Diplodus vulgaris	1	10
2016-10-22	24.8936	37.5084	Syros	North Syros	Diplodus vulgaris	2	11
2016-10-22	24.8936	37.5084	Syros	North Syros	Serranus cabrilla	1	12
2016-10-22	24.8936	37.5084	Syros	North Syros	Serranus scriba	1	13
2016-10-22	24.8936	37.5084	Syros	North Syros	Sparisoma cretense	5	11
2016-10-22	24.8936	37.5084	Syros	North Syros	Sparisoma cretense	1	15
2016-10-22	24.8936	37.5084	Syros	North Syros	Siganus luridus	3	13
2016-10-22	24.8936	37.5084	Syros	North Syros	Siganus luridus	1	15
2016-10-22	24.8936	37.5084	Syros	North Syros	Diplodus sargus	1	11
2016-10-22	24.8936	37.5084	Syros	North Syros	Diplodus vulgaris	1	9
2016-10-22	24.8936	37.5084	Syros	North Syros	Diplodus vulgaris	6	10
2016-10-22	24.8936	37.5084	Syros	North Syros	Oblada melanura	4	11
2016-10-22	24.8936	37.5084	Syros	North Syros	Sparisoma cretense	2	14
2016-10-22	24.8936	37.5084	Syros	North Syros	Sparisoma cretense	1	16
2016-10-22	24.8936	37.5084	Syros	North Syros	Siganus luridus	4	13
2016-10-22	24.8936	37.5084	Syros	North Syros	Siganus rivulatus	1	15
2016-10-22	24.8936	37.5084	Syros	North Syros	Siganus rivulatus	3	9
2016-10-22	24.8936	37.5084	Syros	North Syros	Epinephelus costae	1	16
2016-10-22	24.8936	37.5084	Syros	North Syros	Diplodus vulgaris	3	11
2016-10-22	24.8936	37.5084	Syros	North Syros	Serranus cabrilla	1	9
2016-10-22	24.8936	37.5084	Syros	North Syros	Sparisoma cretense	4	12
2016-10-22	24.8936	37.5084	Syros	North Syros	Sparisoma cretense	1	15
2016-10-22	24.8936	37.5084	Syros	North Syros	Sparisoma cretense	5	10
2016-10-22	24.8936	37.5084	Syros	North Syros	Siganus luridus	4	13
2016-10-22	24.8936	37.5084	Syros	North Syros	Siganus luridus	8	10
2016-10-22	24.8936	37.5084	Syros	North Syros	epinephelus marginatus	1	13
2016-10-22	24.8936	37.5084	Syros	North Syros	Sarpa salpa	25	13
2016-10-22	24.8936	37.5084	Syros	North Syros	Sparisoma cretense	5	14
2016-10-22	24.8936	37.5084	Syros	North Syros	Sparisoma cretense	1	16
2016-10-22	24.8936	37.5084	Syros	North Syros	Siganus luridus	3	11
2016-10-22	24.8936	37.5084	Syros	North Syros	Siganus luridus	1	18
2016-10-22	24.8936	37.5084	Syros	North Syros	Siganus luridus	10	12
2016-10-22	24.8936	37.5084	Syros	North Syros	Sarpa salpa	3	11
2016-10-22	24.8936	37.5084	Syros	North Syros	Siganus luridus	4	15
2016-10-22	24.8936	37.5084	Syros	North Syros	Siganus luridus	8	9
2016-10-27	23.83	39.1519	Allonisos	Kavo Papa	Diplodus annularis	3	10
2016-10-27	23.83	39.1519	Allonisos	Kavo Papa	Diplodus sargus	2	16
2016-10-27	23.83	39.1519	Allonisos	Kavo Papa	Diplodus vulgaris	7	14
2016-10-27	23.83	39.1519	Allonisos	Kavo Papa	Diplodus vulgaris	16	12
2016-10-27	23.83	39.1519	Allonisos	Kavo Papa	Diplodus vulgaris	3	15
2016-10-27	23.83	39.1519	Allonisos	Kavo Papa	Oblada melanura	4	13
2016-10-27	23.83	39.1519	Allonisos	Kavo Papa	Oblada melanura	7	11
2016-10-27	23.83	39.1519	Allonisos	Kavo Papa	Oblada melanura	5	14
2016-10-27	23.83	39.1519	Allonisos	Kavo Papa	Serranus cabrilla	1	11
2016-10-27	23.83	39.1519	Allonisos	Kavo Papa	Serranus scriba	1	12
2016-10-27	23.83	39.1519	Allonisos	Kavo Papa	Serranus scriba	1	13
2016-10-27	23.83	39.1519	Allonisos	Kavo Papa	Serranus scriba	1	9
2016-10-27	23.83	39.1519	Allonisos	Kavo Papa	Sparisoma cretense	1	14
2016-10-27	23.83	39.1519	Allonisos	Kavo Papa	Sparisoma cretense	5	17
2016-10-27	23.83	39.1519	Allonisos	Kavo Papa	Diplodus sargus	2	15
2016-10-27	23.83	39.1519	Allonisos	Kavo Papa	Diplodus vulgaris	8	15
2016-10-27	23.83	39.1519	Allonisos	Kavo Papa	Diplodus vulgaris	1	14
2016-10-27	23.83	39.1519	Allonisos	Kavo Papa	Oblada melanura	13	12
2016-10-27	23.83	39.1519	Allonisos	Kavo Papa	Serranus scriba	1	12
2016-10-27	23.83	39.1519	Allonisos	Kavo Papa	Sparisoma cretense	1	14
2016-10-27	23.83	39.1519	Allonisos	Kavo Papa	epinephelus marginatus	1	30
2016-10-27	23.83	39.1519	Allonisos	Kavo Papa	Diplodus annularis	1	10
2016-10-27	23.83	39.1519	Allonisos	Kavo Papa	Diplodus vulgaris	7	10
2016-10-27	23.83	39.1519	Allonisos	Kavo Papa	Diplodus vulgaris	1	17
2016-10-27	23.83	39.1519	Allonisos	Kavo Papa	Diplodus vulgaris	1	14
2016-10-27	23.83	39.1519	Allonisos	Kavo Papa	Diplodus puntazzo	1	9
2016-10-27	23.83	39.1519	Allonisos	Kavo Papa	Oblada melanura	27	13
2016-10-27	23.83	39.1519	Allonisos	Kavo Papa	Serranus cabrilla	1	12
2016-10-27	23.83	39.1519	Allonisos	Kavo Papa	Serranus cabrilla	1	11
2016-10-27	23.83	39.1519	Allonisos	Kavo Papa	Serranus scriba	1	10
2016-10-27	23.83	39.1519	Allonisos	Kavo Papa	Serranus scriba	1	15
2016-10-27	23.83	39.1519	Allonisos	Kavo Papa	Sarpa salpa	3	14
2016-10-27	23.83	39.1519	Allonisos	Kavo Papa	Sparisoma cretense	1	15
2016-10-27	23.83	39.1519	Allonisos	Kavo Papa	Sparisoma cretense	1	23
2016-10-27	23.83	39.1519	Allonisos	Kavo Papa	Sparisoma cretense	4	16
2016-10-27	23.83	39.1519	Allonisos	Kavo Papa	Diplodus vulgaris	3	11
2016-10-27	23.83	39.1519	Allonisos	Kavo Papa	Diplodus vulgaris	21	9
2016-10-27	23.83	39.1519	Allonisos	Kavo Papa	Diplodus vulgaris	1	4
2016-10-27	23.83	39.1519	Allonisos	Kavo Papa	Diplodus vulgaris	5	12
2016-10-27	23.83	39.1519	Allonisos	Kavo Papa	Serranus cabrilla	2	11
2016-10-27	23.83	39.1519	Allonisos	Kavo Papa	Serranus cabrilla	4	12
2016-10-27	23.83	39.1519	Allonisos	Kavo Papa	Serranus scriba	1	13
2016-10-27	23.83	39.1519	Allonisos	Kavo Papa	Diplodus sargus	1	10
2016-10-27	23.83	39.1519	Allonisos	Kavo Papa	Diplodus vulgaris	3	12
2016-10-27	23.83	39.1519	Allonisos	Kavo Papa	Diplodus vulgaris	5	14
2016-10-27	23.83	39.1519	Allonisos	Kavo Papa	Diplodus vulgaris	1	10
2016-10-27	23.83	39.1519	Allonisos	Kavo Papa	Diplodus vulgaris	1	9
2016-10-27	23.83	39.1519	Allonisos	Kavo Papa	Serranus cabrilla	1	12
2016-10-27	23.83	39.1519	Allonisos	Kavo Papa	Serranus scriba	1	14
2016-10-27	23.83	39.1519	Allonisos	Kavo Papa	Serranus scriba	1	13
2016-10-27	23.83	39.1519	Allonisos	Kavo Papa	Sparisoma cretense	1	17
2016-10-27	23.83	39.1519	Allonisos	Kavo Papa	Sparisoma cretense	1	15
2016-10-27	23.83	39.1519	Allonisos	Kavo Papa	Diplodus sargus	1	12
2016-10-27	23.83	39.1519	Allonisos	Kavo Papa	Diplodus vulgaris	5	14
2016-10-27	23.83	39.1519	Allonisos	Kavo Papa	Diplodus vulgaris	1	13
2016-10-27	23.83	39.1519	Allonisos	Kavo Papa	Diplodus vulgaris	2	10
2016-10-27	23.83	39.1519	Allonisos	Kavo Papa	Diplodus puntazzo	1	11
2016-10-27	23.83	39.1519	Allonisos	Kavo Papa	Serranus scriba	1	13
2016-10-27	23.8365	39.1389	Allonisos	Mikros mourtias	Diplodus annularis	1	9
2016-10-27	23.8365	39.1389	Allonisos	Mikros mourtias	Diplodus annularis	1	11
2016-10-27	23.8365	39.1389	Allonisos	Mikros mourtias	Diplodus vulgaris	18	10
2016-10-27	23.8365	39.1389	Allonisos	Mikros mourtias	Diplodus vulgaris	1	12
2016-10-27	23.8365	39.1389	Allonisos	Mikros mourtias	Diplodus vulgaris	4	9
2016-10-27	23.8365	39.1389	Allonisos	Mikros mourtias	Diplodus puntazzo	1	12
2016-10-27	23.8365	39.1389	Allonisos	Mikros mourtias	Serranus cabrilla	1	14
2016-10-27	23.8365	39.1389	Allonisos	Mikros mourtias	Sparisoma cretense	1	22
2016-10-27	23.8365	39.1389	Allonisos	Mikros mourtias	Sparisoma cretense	3	17
2016-10-27	23.8365	39.1389	Allonisos	Mikros mourtias	Epinephelus costae	1	14
2016-10-27	23.8365	39.1389	Allonisos	Mikros mourtias	Epinephelus costae	1	20
2016-10-27	23.8365	39.1389	Allonisos	Mikros mourtias	Spondyliosoma cantharus	8	10
2016-10-27	23.8365	39.1389	Allonisos	Mikros mourtias	Diplodus annularis	4	9
2016-10-27	23.8365	39.1389	Allonisos	Mikros mourtias	Diplodus annularis	5	10
2016-10-27	23.8365	39.1389	Allonisos	Mikros mourtias	Diplodus vulgaris	1	11
2016-10-27	23.8365	39.1389	Allonisos	Mikros mourtias	Diplodus vulgaris	10	12
2016-10-27	23.8365	39.1389	Allonisos	Mikros mourtias	Mullus surmuletus	1	11
2016-10-27	23.8365	39.1389	Allonisos	Mikros mourtias	Serranus cabrilla	2	13
2016-10-27	23.8365	39.1389	Allonisos	Mikros mourtias	Serranus scriba	1	15
2016-10-27	23.8365	39.1389	Allonisos	Mikros mourtias	Serranus scriba	2	11
2016-10-27	23.8365	39.1389	Allonisos	Mikros mourtias	Serranus scriba	8	12
2016-10-27	23.8365	39.1389	Allonisos	Mikros mourtias	epinephelus marginatus	1	60
2016-10-27	23.8365	39.1389	Allonisos	Mikros mourtias	Spondyliosoma cantharus	25	11
2016-10-27	23.8365	39.1389	Allonisos	Mikros mourtias	Muraena helena	1	mikri
2016-10-27	23.8365	39.1389	Allonisos	Mikros mourtias	Diplodus annularis	9	10
2016-10-27	23.8365	39.1389	Allonisos	Mikros mourtias	Diplodus sargus	1	14
2016-10-27	23.8365	39.1389	Allonisos	Mikros mourtias	Diplodus vulgaris	5	13
2016-10-27	23.8365	39.1389	Allonisos	Mikros mourtias	Diplodus vulgaris	4	10
2016-10-27	23.8365	39.1389	Allonisos	Mikros mourtias	Diplodus vulgaris	3	15
2016-10-27	23.8365	39.1389	Allonisos	Mikros mourtias	Serranus cabrilla	3	12
2016-10-27	23.8365	39.1389	Allonisos	Mikros mourtias	Serranus scriba	4	13
2016-10-27	23.8365	39.1389	Allonisos	Mikros mourtias	Serranus scriba	1	12
2016-10-27	23.8365	39.1389	Allonisos	Mikros mourtias	Serranus scriba	1	14
2016-10-27	23.8365	39.1389	Allonisos	Mikros mourtias	Epinephelus costae	1	30
2016-10-27	23.8365	39.1389	Allonisos	Mikros mourtias	Epinephelus costae	2	35
2016-10-27	23.8365	39.1389	Allonisos	Mikros mourtias	Epinephelus costae	1	50
2016-10-27	23.8365	39.1389	Allonisos	Mikros mourtias	epinephelus marginatus	1	50
2016-10-27	23.8365	39.1389	Allonisos	Mikros mourtias	epinephelus marginatus	1	25
2016-10-27	23.8365	39.1389	Allonisos	Mikros mourtias	epinephelus marginatus	3	40
2016-10-27	23.8365	39.1389	Allonisos	Mikros mourtias	Spondyliosoma cantharus	10	11
2016-10-27	23.8365	39.1389	Allonisos	Mikros mourtias	Diplodus annularis	1	9
2016-10-27	23.8365	39.1389	Allonisos	Mikros mourtias	Diplodus sargus	1	10
2016-10-27	23.8365	39.1389	Allonisos	Mikros mourtias	Diplodus sargus	1	14
2016-10-27	23.8365	39.1389	Allonisos	Mikros mourtias	Diplodus vulgaris	15	7
2016-10-27	23.8365	39.1389	Allonisos	Mikros mourtias	Serranus scriba	1	13
2016-10-27	23.8365	39.1389	Allonisos	Mikros mourtias	Sparisoma cretense	3	7
2016-10-27	23.8365	39.1389	Allonisos	Mikros mourtias	Diplodus annularis	1	5
2016-10-27	23.8365	39.1389	Allonisos	Mikros mourtias	Serranus scriba	1	14
2016-10-27	23.8365	39.1389	Allonisos	Mikros mourtias	Serranus scriba	1	11
2016-10-27	23.8365	39.1389	Allonisos	Mikros mourtias	Serranus scriba	2	9
2016-10-27	23.8365	39.1389	Allonisos	Mikros mourtias	Diplodus annularis	5	7
2016-10-27	23.8365	39.1389	Allonisos	Mikros mourtias	Diplodus annularis	1	10
2016-10-27	23.8365	39.1389	Allonisos	Mikros mourtias	Diplodus annularis	1	4
2016-10-27	23.8365	39.1389	Allonisos	Mikros mourtias	Diplodus vulgaris	3	8
2016-10-27	23.8365	39.1389	Allonisos	Mikros mourtias	Diplodus vulgaris	2	9
2016-10-27	23.8365	39.1389	Allonisos	Mikros mourtias	Mullus surmuletus	1	10
2016-10-27	23.8365	39.1389	Allonisos	Mikros mourtias	Serranus cabrilla	1	9
2016-10-27	23.8365	39.1389	Allonisos	Mikros mourtias	Serranus scriba	1	15
2016-10-27	23.8365	39.1389	Allonisos	Mikros mourtias	Serranus scriba	2	13
2016-10-27	23.8365	39.1389	Allonisos	Mikros mourtias	Serranus scriba	1	11
2016-10-27	23.8365	39.1389	Allonisos	Mikros mourtias	Sarpa salpa	18	9
2016-10-27	23.8365	39.1389	Allonisos	Mikros mourtias	Sparisoma cretense	1	8
2016-10-29	23.9793	39.1044	Allonisos	Dyo aderfia	Diplodus vulgaris	3	10
2016-10-29	23.9793	39.1044	Allonisos	Dyo aderfia	Diplodus puntazzo	1	17
2016-10-29	23.9793	39.1044	Allonisos	Dyo aderfia	Serranus cabrilla	2	13
2016-10-29	23.9793	39.1044	Allonisos	Dyo aderfia	Serranus cabrilla	1	12
2016-10-29	23.9793	39.1044	Allonisos	Dyo aderfia	Serranus cabrilla	4	11
2016-10-29	23.9793	39.1044	Allonisos	Dyo aderfia	Sarpa salpa	2	15
2016-10-29	23.9793	39.1044	Allonisos	Dyo aderfia	Sarpa salpa	10	16
2016-10-29	23.9793	39.1044	Allonisos	Dyo aderfia	Diplodus sargus	2	16
2016-10-29	23.9793	39.1044	Allonisos	Dyo aderfia	Diplodus vulgaris	1	11
2016-10-29	23.9793	39.1044	Allonisos	Dyo aderfia	Serranus cabrilla	5	11
2016-10-29	23.9793	39.1044	Allonisos	Dyo aderfia	Serranus cabrilla	2	12
2016-10-29	23.9793	39.1044	Allonisos	Dyo aderfia	Sarpa salpa	3	16
2016-10-29	23.9793	39.1044	Allonisos	Dyo aderfia	Sarpa salpa	9	15
2016-10-29	23.9793	39.1044	Allonisos	Dyo aderfia	Diplodus puntazzo	1	16
2016-10-29	23.9793	39.1044	Allonisos	Dyo aderfia	Serranus cabrilla	1	13
2016-10-29	23.9793	39.1044	Allonisos	Dyo aderfia	Serranus cabrilla	5	12
2016-10-29	23.9793	39.1044	Allonisos	Dyo aderfia	Serranus cabrilla	2	11
2016-10-29	23.9793	39.1044	Allonisos	Dyo aderfia	Sarpa salpa	8	15
2016-10-29	23.9793	39.1044	Allonisos	Dyo aderfia	Sarpa salpa	5	16
2016-10-29	23.9793	39.1044	Allonisos	Dyo aderfia	Sarpa salpa	12	14
2016-10-29	23.9793	39.1044	Allonisos	Dyo aderfia	Sparisoma cretense	1	25
2016-10-29	23.9793	39.1044	Allonisos	Dyo aderfia	Sparisoma cretense	1	21
2016-10-29	23.9793	39.1044	Allonisos	Dyo aderfia	Sparisoma cretense	2	17
2016-10-29	23.9793	39.1044	Allonisos	Dyo aderfia	Serranus cabrilla	1	16
2016-10-29	23.9793	39.1044	Allonisos	Dyo aderfia	Serranus scriba	1	10
2016-10-29	23.9793	39.1044	Allonisos	Dyo aderfia	Diplodus annularis	1	5
2016-10-29	23.9793	39.1044	Allonisos	Dyo aderfia	Diplodus puntazzo	3	14
2016-10-29	23.9793	39.1044	Allonisos	Dyo aderfia	Serranus scriba	1	11
2016-10-29	23.9793	39.1044	Allonisos	Dyo aderfia	Sarpa salpa	4	16
2016-10-29	23.9793	39.1044	Allonisos	Dyo aderfia	Sarpa salpa	3	15
2016-10-29	23.9793	39.1044	Allonisos	Dyo aderfia	Diplodus sargus	1	15
2016-10-29	23.9793	39.1044	Allonisos	Dyo aderfia	Oblada melanura	4	6
2016-10-29	23.9793	39.1044	Allonisos	Dyo aderfia	Mullus surmuletus	2	9
2016-10-29	23.9793	39.1044	Allonisos	Dyo aderfia	Serranus scriba	2	15
2016-10-29	23.9793	39.1044	Allonisos	Dyo aderfia	Serranus scriba	3	13
2016-10-29	23.9793	39.1044	Allonisos	Dyo aderfia	Sarpa salpa	4	14
2016-10-29	23.9793	39.1044	Allonisos	Dyo aderfia	Spondyliosoma cantharus	1	20
